# Supplementary material for: Comparative transcriptomics of sympatric species of coral reef fishes (genus: Haemulon)
Source: PeerJ. 2019 Mar 1;7:e6541. doi: 10.7717/peerj.6541 (PMC6398375; doi:10.7717/peerj.6541)
Supplement: Supplemental Information 3 [file peerj-07-6541-s003.xlsx]

## Sheet: car-flav
isogroup	Protein	e.value	baseMean	log2FoldChange	lfcSE	stat	pvalue	padj
isogroup1005	UDP-glucuronosyltransferase 1-1	7e-160	9.69498	-2.63493	0.453986	-5.80398	6.48e-09	4.73e-07
isogroup10077	CXC chemokine	1e-34	5.73157	2.06961	0.464297	4.45751	8.29e-06	0.000263223
isogroup1010	Calpastatin	4e-28	92.7569	-1.04669	0.156363	-6.694	2.17e-11	2.48e-09
isogroup1012	Ras GTPase-activating protein IQGAP2	2e-150	76.7217	-0.72185	0.175766	-4.10687	4.01e-05	0.000977912
isogroup1014	Fetuin-B	2e-158	416.484	0.754947	0.147662	5.11266	3.18e-07	1.57e-05
isogroup10215	Reverse transcriptase (Fragment)	2e-41	3.51204	2.13555	0.584854	3.65143	0.000260786	0.0045371
isogroup1023	Enoyl-CoA delta isomerase 1 mitochondrial	1e-172	21.8247	-1.3701	0.313898	-4.3648	1.27e-05	0.000372883
isogroup10259	Transmembrane protein 120A	3e-54	11.1565	2.00071	0.499357	4.00658	6.16e-05	0.00138858
isogroup10275	Sulfotransferase	4e-06	2.23547	2.36308	0.677985	3.48544	0.000491332	0.00750298
isogroup10307	RNA-directed DNA polymerase from mobile element jockey	5e-12	5.9432	2.22097	0.49379	4.49779	6.87e-06	0.000223933
isogroup10317	PPUP369 (Fragment)	1e-18	5.67977	-2.48545	0.518002	-4.79814	1.6e-06	6.49e-05
isogroup1032	Alcohol dehydrogenase [NADP(+)]	2e-151	48.4809	-1.4245	0.248065	-5.74244	9.33e-09	6.57e-07
isogroup1034	Proline-serine-threonine phosphatase-interacting protein 2	2e-124	10.2884	-1.53249	0.407376	-3.76186	0.000168652	0.00317354
isogroup10347	Alpha-N-acetylgalactosaminidase	1e-81	7.36443	-2.26386	0.424728	-5.33013	9.81e-08	5.64e-06
isogroup1035	Aldose reductase	8e-88	130.453	0.580484	0.169561	3.42345	0.00061831	0.00895891
isogroup104	Cytochrome P450 2F3	1e-155	53.2984	-0.984747	0.182161	-5.40591	6.45e-08	3.88e-06
isogroup10466	p3 protein	2e-11	38.6317	2.05046	0.276887	7.40538	1.31e-13	2.04e-11
isogroup1051	Alpha-2-HS-glycoprotein	6e-144	6875.32	1.13184	0.251761	4.49567	6.94e-06	0.000225406
isogroup10519	IQGA1 (Fragment)	1e-117	8.13835	-1.89026	0.395231	-4.78268	1.73e-06	6.93e-05
isogroup10610	CO3 (Fragment)	6e-46	13.2944	-4.40197	0.556659	-7.90784	2.62e-15	4.96e-13
isogroup1081	Solute carrier family 22 member 13	4e-180	8.66214	2.07465	0.41793	4.96411	6.9e-07	3.11e-05
isogroup10866	CTD small phosphatase protein 2-B	1e-31	9.52711	1.49476	0.382694	3.90588	9.39e-05	0.00195433
isogroup10875	Granzyme	2e-46	5.90584	-4.59106	0.741057	-6.19528	5.82e-10	5.14e-08
isogroup10965	Tyrosylprotein sulfotransferase 1 like	1e-71	30.6223	-1.17426	0.275645	-4.26003	2.04e-05	0.00055785
isogroup11	Chromosome 3 open reading frame 17	2e-138	62.0718	-1.99508	0.303054	-6.58326	4.6e-11	5.02e-09
isogroup11033	U6 snRNA-associated Sm protein LSm5	2e-49	9.88439	-1.65833	0.37256	-4.45118	8.54e-06	0.000268421
isogroup11069	GEPH	3e-75	22.5547	-0.97995	0.289415	-3.38597	0.000709277	0.00995938
isogroup11133	Cleavage and polyadenylation specificity factor subunit 3	3e-126	2.93381	-1.92013	0.531093	-3.61543	0.000299854	0.00508986
isogroup1114	Dual specificity protein phosphatase 23	4e-91	17.0973	-1.34594	0.38946	-3.45591	0.000548434	0.00815029
isogroup11314	Regulator of microtubule dynamics protein 1	2e-13	54.4576	1.554	0.231521	6.71212	1.92e-11	2.2e-09
isogroup1134	Phospholipase A2 group VII (Platelet-activating factor acetylhydrolase plasma)	1e-177	12.5092	1.38899	0.3998	3.47423	0.000512325	0.00775318
isogroup114	Cytochrome P450 3A40	1e-149	42.3951	1.18636	0.2259	5.2517	1.51e-07	8.26e-06
isogroup1150	Very long-chain acyl-CoA synthetase	1e-135	7.4404	-2.75981	0.492723	-5.60113	2.13e-08	1.4e-06
isogroup11578	Cytochrome c oxidase subunit	2e-52	153.193	-1.59253	0.259676	-6.13276	8.64e-10	7.37e-08
isogroup1171	Membrane-spanning 4-domains subfamily A member 8A	1e-95	36.749	-0.878895	0.228628	-3.84422	0.000120939	0.00241878
isogroup11710	Centromeric protein A	5e-56	1.27225	3.36684	0.827008	4.07111	4.68e-05	0.00110692
isogroup1180	5-formyltetrahydrofolate cyclo-ligase	2e-103	32.2647	-1.03181	0.27775	-3.71488	0.000203296	0.00370576
isogroup1192	Flavin reductase (NADPH)	9e-137	8.63017	-1.93871	0.448599	-4.32169	1.55e-05	0.000439356
isogroup11920	PPUP4125 (Fragment)	1e-79	27.4755	-2.14731	0.45527	-4.71657	2.4e-06	9.13e-05
isogroup1193	Nipsnap1 (Fragment)	4e-179	40.1209	1.06184	0.284631	3.73059	0.000191034	0.00350254
isogroup11995	Par-6 partitioning defective 6 homolog gamma B (Fragment)	4e-11	9.09076	-1.73976	0.3349	-5.19485	2.05e-07	1.07e-05
isogroup120	Peroxisomal acyl-coenzyme A oxidase 3	2e-137	35.1637	5.14903	0.386363	13.3269	1.61e-40	2.89e-37
isogroup12056	ATS6 (Fragment)	3e-39	2.99	3.43028	0.655285	5.23478	1.65e-07	8.85e-06
isogroup12083	2-deoxynucleoside 5-phosphate N-hydrolase 1	2e-78	14.827	-1.34797	0.352848	-3.82025	0.000133317	0.00261532
isogroup1215	Serine/threonine-protein kinase Nek6	8e-173	50.0766	1.49658	0.247963	6.03548	1.58e-09	1.28e-07
isogroup12176	RNA binding motif protein 28 (Fragment)	2e-50	4.11983	3.09666	0.614457	5.03966	4.66e-07	2.18e-05
isogroup12192	Small nuclear ribonucleoprotein G (Fragment)	2e-48	69.3741	-0.862974	0.220934	-3.90602	9.38e-05	0.00195433
isogroup122	Keratinocytes-associated transmembrane protein 2	2e-41	135.61	-1.25413	0.174198	-7.19942	6.05e-13	8.78e-11
isogroup12248	Multidrug resistance-associated protein 4	2e-26	4.90098	1.9851	0.483538	4.10537	4.04e-05	0.000980939
isogroup1227	Antithrombin-III	2e-168	447.01	0.783418	0.169599	4.61924	3.85e-06	0.000138044
isogroup12311	Chromosome 1 SCAF14573 whole genome shotgun sequence (Fragment)	2e-30	3.56669	-1.97553	0.537107	-3.6781	0.000234978	0.00417184
isogroup1233	Aldo-keto reductase family 1 member B10	3e-177	128.401	-3.02166	0.29981	-10.0786	6.87e-24	3.28e-21
isogroup12333	NAD-dependent protein deacetylase sirtuin-2	9e-84	4.73451	1.82451	0.525408	3.47257	0.000515503	0.00779304
isogroup12421	Sulfotransferase	2e-20	4.4445	3.55423	0.678856	5.23561	1.64e-07	8.82e-06
isogroup12460	Microfibrillar associated protein (Fragment)	4e-57	2.67219	2.26394	0.641207	3.53075	0.00041439	0.0065767
isogroup12469	RNA binding motif protein X-linked 2	1e-94	3.24725	2.15137	0.540985	3.97676	6.99e-05	0.0015382
isogroup12517	Phenylalanine hydroxylase (Fragment)	3e-19	13.1797	-2.80277	0.517388	-5.41715	6.06e-08	3.66e-06
isogroup12536	Upf0249 protein ydjc homolog	1e-30	3.65121	3.33312	0.770254	4.32731	1.51e-05	0.000430866
isogroup12556	Thioredoxin-related transmembrane protein 2-B	2e-15	8.71935	1.71332	0.387695	4.41924	9.91e-06	0.000303325
isogroup1261	Calmin	3e-148	4.0632	2.46889	0.589464	4.18837	2.81e-05	0.000729104
isogroup1265	Membrane-spanning 4-domains subfamily A member 8A	1e-96	21.2096	-1.24349	0.299432	-4.15283	3.28e-05	0.000831953
isogroup1266	Protein odr-4 homolog	9e-92	8.38624	-1.25949	0.345055	-3.65011	0.000262128	0.00455702
isogroup12668	Lysophosphatidylcholine acyltransferase 2 (Fragment)	3e-41	22.0112	-1.27329	0.301929	-4.21719	2.47e-05	0.000651587
isogroup12674	Glutathione S-transferase theta 1b	9e-99	56.2982	1.33657	0.325493	4.1063	4.02e-05	0.000978662
isogroup1269	Mannose-6-phosphate isomerase	3e-37	10.3219	-1.83804	0.421403	-4.3617	1.29e-05	0.000377234
isogroup12695	Tripartite motif-containing protein 39	4e-40	77.2373	-1.25039	0.276312	-4.52529	6.03e-06	0.000200592
isogroup127	Tropomyosin alpha-3 chain	3e-88	58.9595	-0.815574	0.228939	-3.5624	0.000367477	0.00596175
isogroup12702	Sulfhydryl oxidase	3e-72	4.88257	2.55238	0.452411	5.64172	1.68e-08	1.14e-06
isogroup1272	Solute carrier family 25 member 39	3e-69	47.1856	-1.10628	0.293324	-3.77153	0.00016225	0.00307007
isogroup1274	Butyrophilin subfamily 2 member A23	5e-40	3.39891	2.55042	0.664237	3.83962	0.000123226	0.00245269
isogroup1275	General vesicular transport factor p115	1e-31	13.3209	-1.20888	0.32537	-3.7154	0.000202883	0.0037008
isogroup128	Probable acyl-CoA dehydrogenase 6	3e-143	41.9391	-1.14072	0.214774	-5.31126	1.09e-07	6.23e-06
isogroup1290	Organic solute transporter subunit beta	2e-64	372.951	-0.717914	0.153397	-4.68009	2.87e-06	0.000106654
isogroup13032	Troponin C	1e-72	3.95169	4.02073	0.66154	6.07784	1.22e-09	1e-07
isogroup1308	Ependymin	6e-109	8.95102	-1.96707	0.386408	-5.09066	3.57e-07	1.73e-05
isogroup1310	Glutaminase kidney isoform mitochondrial	6e-158	23.8786	-0.856632	0.233947	-3.66164	0.000250603	0.00440008
isogroup13184	Sodium-coupled neutral amino acid transporter 3	5e-37	6.03628	1.82589	0.467093	3.90904	9.27e-05	0.00193455
isogroup1319	MA7D1	1e-52	41.1765	1.56183	0.283079	5.51728	3.44e-08	2.17e-06
isogroup1330	Gamma-aminobutyric acid receptor-associated protein	9e-77	224.908	-0.577757	0.156297	-3.69653	0.000218563	0.00393166
isogroup13388	Huntingtin interacting protein K (Fragment)	4e-61	149.732	-0.674941	0.164331	-4.10719	4e-05	0.000977586
isogroup1340	Alpha-L-fucosidase	7e-179	18.8499	1.77021	0.435245	4.06716	4.76e-05	0.00112213
isogroup13519	Protein FAM35A	7e-24	4.37881	2.00888	0.469356	4.28007	1.87e-05	0.000517333
isogroup13551	NADH-ubiquinone oxidoreductase chain 2	1e-70	21.834	2.53483	0.334725	7.57288	3.65e-14	6.21e-12
isogroup13552	NADH-ubiquinone oxidoreductase chain 2	5e-31	65.1472	1.59266	0.251854	6.32376	2.55e-10	2.41e-08
isogroup1356	Protein-glutamine gamma-glutamyltransferase 2	4e-77	6.17116	2.06767	0.520713	3.97084	7.16e-05	0.00156973
isogroup1365	Mitochondrial import inner membrane translocase subunit TIM17	6e-82	36.0994	-0.951096	0.278835	-3.41096	0.000647349	0.00927629
isogroup1374	Phospholipid phosphatase 3	1e-140	17.0448	-1.34593	0.295899	-4.54861	5.4e-06	0.00018366
isogroup13773	Virus induced TRIM protein (Fragment)	2e-07	7.93314	2.12569	0.478799	4.43962	9.01e-06	0.00028223
isogroup13833	Lipoprotein lipase	1e-08	49.8673	1.95485	0.509628	3.83583	0.000125139	0.00247869
isogroup13937	Epidermal growth factor receptor a (Fragment)	7e-78	1.87473	-2.51753	0.704319	-3.57442	0.000351005	0.0057533
isogroup1402	ADP-ribosylation factor 6	1e-44	23.1205	1.0255	0.214925	4.77145	1.83e-06	7.26e-05
isogroup14091	C-C motif chemokine 4	5e-29	27.0898	1.86614	0.427177	4.36854	1.25e-05	0.000367323
isogroup14166	HNRL1	7e-24	5.89196	-2.84656	0.628435	-4.5296	5.91e-06	0.000197227
isogroup1429	Solute carrier family 22 member 18	2e-107	3.60916	-1.91999	0.55766	-3.44294	0.000575433	0.00848816
isogroup1433	Malate dehydrogenase mitochondrial	1e-171	115.81	1.69032	0.184706	9.15139	5.62e-20	1.73e-17
isogroup14339	Zinc finger protein 40	8e-37	3.40796	2.14073	0.613272	3.49066	0.000481824	0.00740871
isogroup1454	Cholesteryl ester transfer protein (Fragment)	2e-57	11.1975	1.52939	0.402818	3.79674	0.000146609	0.00282759
isogroup14590	Bis(5-nucleosyl)-tetraphosphatase [asymmetrical]	6e-10	8.76543	-1.65784	0.400454	-4.13991	3.47e-05	0.000868681
isogroup14621	ZFP36 ring finger protein 1 (Fragment)	1e-43	5.20742	-3.31296	0.641781	-5.16214	2.44e-07	1.25e-05
isogroup1463	Repressor of RNA polymerase III transcription MAF1	4e-60	82.7259	-0.840395	0.231127	-3.63607	0.000276827	0.00476402
isogroup1467	Butyrophilin subfamily 2 member A2	3e-112	27.9731	1.03669	0.301503	3.4384	0.000585169	0.00858308
isogroup1480	Mannan-binding lectin serine protease 1	6e-96	83.2427	-0.856074	0.166617	-5.13797	2.78e-07	1.4e-05
isogroup1484	Chromosome 11 SCAF14979 whole genome shotgun sequence	1e-117	74.9433	0.906053	0.155617	5.82234	5.8e-09	4.29e-07
isogroup14866	Complement factor B protein (Fragment)	4e-80	2.34836	-3.15485	0.872077	-3.61763	0.000297318	0.00505582
isogroup14931	Tributyltin binding protein type 1	5e-30	42.6366	-2.32852	0.34979	-6.65691	2.8e-11	3.14e-09
isogroup15087	LDL receptor (Fragment)	5e-19	1.53221	2.62538	0.710174	3.69681	0.000218323	0.00392981
isogroup1517	3-oxo-5-beta-steroid 4-dehydrogenase	1e-79	222.037	-1.92776	0.23347	-8.25701	1.49e-16	3.24e-14
isogroup1530	D-dopachrome tautomerase	7e-68	73.9888	0.918775	0.225985	4.06564	4.79e-05	0.00112702
isogroup1538	NACHT LRR and PYD domains-containing protein 12	8e-16	4.03575	-1.85504	0.504392	-3.67778	0.000235272	0.00417447
isogroup15647	Cutaneous T-cell lymphoma-associated antigen 5	6e-08	37.6573	1.94255	0.283624	6.84902	7.44e-12	9.09e-10
isogroup15650	Claudin	1e-65	7.59609	-1.65392	0.463049	-3.5718	0.000354542	0.00579794
isogroup157	Acyl-coenzyme A thioesterase 4	2e-51	260.946	-1.47749	0.250887	-5.88904	3.88e-09	2.93e-07
isogroup15716	Actin-related protein 2/3 complex subunit 5	2e-89	3.12725	2.0681	0.443345	4.66476	3.09e-06	0.000113882
isogroup1575	Agrin (Fragment)	9e-34	199.67	1.04343	0.16031	6.50881	7.57e-11	7.85e-09
isogroup158	Vitronectin	2e-149	591.491	-0.750784	0.156303	-4.80339	1.56e-06	6.34e-05
isogroup1581	Cytochrome c oxidase subunit 4 isoform 2 mitochondrial	9e-76	630.365	-0.442679	0.127702	-3.46651	0.000527254	0.00790997
isogroup159	Sorting nexin-12 (Fragment)	7e-98	32.0839	-0.845077	0.247568	-3.41351	0.000641324	0.00921303
isogroup15908	Pentaxin	1e-51	97.9169	-3.37514	0.637775	-5.29205	1.21e-07	6.86e-06
isogroup1594	Ribonuclease UK114	1e-88	229.991	-0.72612	0.187061	-3.88172	0.000103718	0.00213115
isogroup15993	Uridine 5-monophosphate synthase	3e-89	0.98335	2.71332	0.790545	3.43221	0.000598674	0.00874529
isogroup16	GLGB (Fragment)	1e-25	80.6438	1.24061	0.199961	6.20426	5.5e-10	4.87e-08
isogroup16085	Tumor necrosis factor receptor superfamily member 14	7e-08	1.11765	2.96027	0.770939	3.83983	0.000123119	0.00245226
isogroup16137	GTPase IMAP family member 7	7e-28	4.14724	2.63595	0.553548	4.76192	1.92e-06	7.57e-05
isogroup1618	Malate synthase A MSA domain-containing protein	2e-119	120.069	-0.658554	0.185772	-3.54496	0.000392672	0.00628847
isogroup16183	Complement component C3	6e-88	5.24346	-2.74418	0.449875	-6.09988	1.06e-09	8.93e-08
isogroup1642	Retinoic acid receptor responder 3	4e-82	81.2129	1.31863	0.244861	5.38522	7.24e-08	4.29e-06
isogroup16493	Zinc finger protein 782	4e-17	1.99514	-2.37662	0.664788	-3.575	0.000350227	0.0057504
isogroup16529	Cytochrome c oxidase subunit 5B mitochondrial	8e-44	3.05828	3.22817	0.676	4.77539	1.79e-06	7.13e-05
isogroup16540	Serine/arginine-rich-splicing factor 11	7e-52	6.36327	4.09146	0.524128	7.80621	5.89e-15	1.07e-12
isogroup16578	Lymphocyte antigen 6D (Fragment)	1e-12	879.796	-3.51537	0.322445	-10.9022	1.12e-27	6.99e-25
isogroup16603	Transmembrane protein 60	6e-81	7.32102	-2.88117	0.727155	-3.96225	7.42e-05	0.00161861
isogroup1669	C-C motif chemokine 25	5e-37	14.4384	3.30032	0.494064	6.67995	2.39e-11	2.71e-09
isogroup16723	Poly [ADP-ribose] polymerase (Fragment)	9e-100	0.8947	2.73246	0.792492	3.44794	0.000564879	0.00835834
isogroup1679	Interleukin-8 protein	3e-32	246.719	1.89281	0.236206	8.0134	1.12e-15	2.25e-13
isogroup16830	Rho-related GTP-binding protein RhoB	7e-58	1.26795	-3.35422	0.761687	-4.40367	1.06e-05	0.00032248
isogroup16855	Monocarboxylate transporter 10	3e-37	3.03557	4.72986	0.69975	6.75935	1.39e-11	1.65e-09
isogroup1688	Chromosome 3 open reading frame 37	1e-180	21.2425	1.00663	0.251188	4.00749	6.14e-05	0.00138534
isogroup16921	FA8A1 (Fragment)	2e-84	4.30995	-1.74956	0.4848	-3.60882	0.00030759	0.00520881
isogroup1709	CATD	4e-165	34.0044	-0.905838	0.21952	-4.12645	3.68e-05	0.000912314
isogroup1716	GRAM domain containing 3	1e-129	83.9077	-2.31456	0.23888	-9.6892	3.35e-22	1.3e-19
isogroup1722	Cutaneous T-cell lymphoma-associated antigen 5	3e-09	51.693	1.51898	0.21741	6.98673	2.81e-12	3.69e-10
isogroup17229	Ring finger protein 14	2e-74	2.34125	2.60208	0.564904	4.60623	4.1e-06	0.000145685
isogroup17276	Tricarboxylate transport protein mitochondrial	7e-43	31.6381	2.12997	0.465717	4.57354	4.8e-06	0.000166259
isogroup173	Probable methylmalonate-semialdehyde dehydrogenase [acylating] mitochondrial	1e-168	32.4229	1.19045	0.244452	4.86987	1.12e-06	4.75e-05
isogroup1737	Carboxymethylenebutenolidase homolog	2e-166	97.791	-0.880009	0.180715	-4.86959	1.12e-06	4.75e-05
isogroup17370	Protein S100	1e-24	61.8548	0.90541	0.233781	3.87289	0.000107551	0.0021957
isogroup1738	RBP4	3e-118	675.941	1.54214	0.290472	5.3091	1.1e-07	6.29e-06
isogroup17469	Metalloendopeptidase (Fragment)	3e-20	10.2552	4.95457	0.656065	7.55195	4.29e-14	7.17e-12
isogroup17519	Transposable element Tcb1 transposase	4e-28	1.66635	4.05039	0.801519	5.0534	4.34e-07	2.06e-05
isogroup1764	Ammonium transporter Rh type B-B	2e-125	46.9846	1.87112	0.427483	4.37707	1.2e-05	0.000354679
isogroup17668	Polyprotein	1e-06	3.34639	2.96751	0.636874	4.65949	3.17e-06	0.000116329
isogroup17793	PPUP2959 (Fragment)	8e-30	1.38289	2.89486	0.835192	3.4661	0.000528074	0.00791612
isogroup1783	Eukaryotic translation initiation factor 5A2 (Fragment)	3e-114	109.627	0.396955	0.10954	3.62384	0.000290264	0.00495452
isogroup17843	Sulfate anion transporter 1 (Fragment)	1e-47	8.29547	1.32251	0.371305	3.5618	0.000368321	0.0059695
isogroup17854	Abhydrolase domain-containing protein 16A	1e-34	3.8279	1.91997	0.463099	4.14591	3.38e-05	0.000851448
isogroup17987	Dipeptidyl peptidase 4	3e-39	9.10832	-2.44283	0.502856	-4.85792	1.19e-06	5e-05
isogroup18004	Ubiquitin-conjugating enzyme E2 H	4e-26	21.0015	-2.05639	0.529629	-3.8827	0.000103301	0.00212742
isogroup18067	Alpha-2-macroglobulin	9e-07	6.58787	2.15628	0.632141	3.41107	0.000647085	0.00927629
isogroup18068	Isochorismatase domain-containing protein 2 mitochondrial	3e-22	44.2654	-1.30776	0.337152	-3.87884	0.000104955	0.00215192
isogroup18085	COP9 signalosome complex subunit 9	9e-21	19.5165	1.12261	0.273401	4.10611	4.02e-05	0.000978662
isogroup1810	Transposase	6e-09	32.1292	-1.4743	0.430081	-3.42796	0.000608124	0.00884719
isogroup1813	Mitochondrial amidoxime-reducing component 1	4e-115	331.876	-0.941241	0.257474	-3.65568	0.000256499	0.00448434
isogroup182	Transposase	2e-12	526.325	-0.99322	0.276662	-3.59001	0.000330669	0.00551474
isogroup18267	Acyl-CoA dehydrogenase family member 11	9e-44	33.802	-1.10934	0.216547	-5.12286	3.01e-07	1.5e-05
isogroup1834	p33MX	9e-30	34.9224	2.1938	0.411565	5.33038	9.8e-08	5.64e-06
isogroup18358	Abnormal spindle microcephaly-associated protein	2e-27	34.7798	3.91727	0.393247	9.96135	2.25e-23	1.02e-20
isogroup18389	Receptor protein serine/threonine kinase	6e-23	13.2727	1.11131	0.318582	3.48829	0.000486116	0.00744319
isogroup1843	Glutathione S-transferase theta-1	3e-146	1685.11	-0.706687	0.192255	-3.67578	0.000237123	0.00419951
isogroup18515	Cytochrome P450 2K1	2e-31	51.9648	4.97974	0.582073	8.55519	1.18e-17	2.83e-15
isogroup1853	E2-induced gene 5 protein homolog	2e-81	57.0134	-0.604352	0.136572	-4.42517	9.64e-06	0.000296377
isogroup1868	Estradiol 17-beta-dehydrogenase 2 (Fragment)	2e-180	61.1469	-1.82148	0.278885	-6.5313	6.52e-11	6.83e-09
isogroup18712	Asparagine synthetase domain-containing protein 1	2e-16	6.36403	-1.54407	0.444353	-3.47487	0.000511097	0.00774279
isogroup18740	Histone H3.3	2e-77	92.6196	-1.66971	0.451504	-3.6981	0.000217219	0.00391487
isogroup1875	Elastin microfibril interfacer 1 (Fragment)	2e-14	50.3739	0.662644	0.185876	3.56498	0.000363884	0.00592699
isogroup1879	C10orf57 homolog	7e-55	88.1993	-1.50356	0.174836	-8.59984	7.98e-18	2e-15
isogroup18860	DNA-directed RNA polymerase II subunit RPB11-a	3e-79	24.2955	-1.81969	0.229046	-7.94467	1.95e-15	3.79e-13
isogroup18862	Essential MCU regulator mitochondrial	4e-24	25.268	-1.99316	0.231873	-8.59593	8.26e-18	2.04e-15
isogroup189	4-aminobutyrate aminotransferase mitochondrial	2e-179	4.49409	1.89494	0.551247	3.43755	0.000587003	0.00860556
isogroup18905	Complement component C3	4e-73	2.89749	-3.20213	0.726985	-4.40466	1.06e-05	0.000321689
isogroup18920	TRDMT (Fragment)	4e-27	2.8337	-2.13995	0.535729	-3.99447	6.48e-05	0.00144999
isogroup1917	DNA-binding protein inhibitor ID-3	9e-71	310.242	-0.806954	0.236325	-3.41459	0.000638779	0.0091857
isogroup1927	Apoptosis-related protein 3	1e-134	6.15203	-1.45175	0.407173	-3.56544	0.000363251	0.00592006
isogroup193	CMP-N-acetylneuraminate-beta-14-galactoside alpha-23-sialyltransferase	1e-180	83.7915	-0.723761	0.195663	-3.69903	0.000216426	0.00390797
isogroup1930	Tetraspanin	4e-91	130.673	-1.01968	0.193955	-5.2573	1.46e-07	8.07e-06
isogroup1935	PAPS1	2e-107	128.711	-3.05043	0.312151	-9.77228	1.48e-22	5.88e-20
isogroup1946	TPM4	4e-86	26.9399	-1.12458	0.266027	-4.22732	2.36e-05	0.000628052
isogroup19533	Transmembrane protein 242	2e-09	6.83649	-1.34571	0.383662	-3.50754	0.000452272	0.00705722
isogroup19596	Meningioma expressed antigen 5 (Hyaluronidase) (Fragment)	6e-84	3.45957	-1.90748	0.530218	-3.59754	0.000321245	0.00539292
isogroup19629	Putative ATP-dependent RNA helicase DDX17	3e-23	9.23201	1.80492	0.376951	4.7882	1.68e-06	6.77e-05
isogroup19653	BMS1	3e-45	3.63081	2.88408	0.696634	4.14003	3.47e-05	0.000868681
isogroup198	Cysteine desulfurase mitochondrial	9e-171	32.8171	-0.814096	0.217407	-3.74456	0.000180708	0.00335407
isogroup19808	CUGBP Elav family member 5 (Fragment)	8e-42	6.24689	2.54263	0.673296	3.77639	0.000159115	0.00302594
isogroup1989	Complement C1q protein 2	2e-73	27.4323	2.23582	0.477563	4.68173	2.84e-06	0.000106216
isogroup200	NADPH--cytochrome P450 reductase (Fragments)	4e-180	87.4848	3.5578	0.276086	12.8865	5.36e-38	6.97e-35
isogroup20007	Reverse transcriptase protein	5e-17	1.41612	3.0612	0.856006	3.57614	0.000348702	0.00573524
isogroup2006	Crystallin J1B	1e-54	214.395	1.17325	0.260412	4.50534	6.63e-06	0.00021781
isogroup20157	Fibronectin	2e-06	2.788	3.17065	0.736152	4.30706	1.65e-05	0.000465734
isogroup2017	Down syndrome critical region protein 3 homolog	3e-174	7.72277	-1.46326	0.346978	-4.21716	2.47e-05	0.000651587
isogroup20249	Cysteinyl-tRNA synthetase 2 mitochondrial (Fragment)	5e-28	14.0456	-1.07678	0.269636	-3.99345	6.51e-05	0.00145395
isogroup20274	Histone H2A	2e-12	4.14125	-1.94144	0.560988	-3.46076	0.000538655	0.00803683
isogroup20398	Complement factor H-related protein 1	1e-31	18.8192	1.82287	0.405372	4.49678	6.9e-06	0.000224486
isogroup2044	Membrane-spanning 4-domains subfamily A member 8A	2e-115	86.5347	-1.43137	0.176797	-8.09612	5.67e-16	1.17e-13
isogroup2064	Solute carrier family 22 member 6	3e-162	121.797	1.01848	0.29784	3.41957	0.000627211	0.00905015
isogroup2073	ATP synthase subunit s mitochondrial	1e-122	7.46689	-2.5737	0.566874	-4.54017	5.62e-06	0.000188915
isogroup2087	UPF0628 protein	2e-22	8.51923	-3.94919	0.690494	-5.71937	1.07e-08	7.46e-07
isogroup2090	Alpha-2-macroglobulin	2e-120	39.6783	1.10382	0.313482	3.52116	0.00042966	0.00676715
isogroup2092	Glutathione S-transferase kappa 1	5e-138	66.7992	-0.780985	0.218493	-3.57442	0.000351007	0.0057533
isogroup20989	Brain protein I3	9e-43	3.12902	-3.11561	0.649724	-4.79528	1.62e-06	6.56e-05
isogroup2116	Putative signal peptidase complex subunit 2	2e-133	15.0792	-1.25229	0.316026	-3.96263	7.41e-05	0.00161861
isogroup21349	IgM heavy chain transmembrane form	1e-44	24.4981	3.11546	0.593871	5.24601	1.55e-07	8.47e-06
isogroup21356	C-type lectin	7e-12	4.82327	-4.0173	0.796321	-5.04482	4.54e-07	2.14e-05
isogroup21428	Solute carrier family 44 member 2	1e-51	9.66972	1.75275	0.507157	3.45603	0.000548202	0.00815029
isogroup2144	Probable thiopurine S-methyltransferase	4e-150	133.396	1.50472	0.326473	4.60901	4.05e-06	0.000144289
isogroup21443	Lymphocyte antigen 6D (Fragment)	4e-21	23.3275	3.90644	0.61662	6.33525	2.37e-10	2.26e-08
isogroup2149	PPUP1683	4e-59	18.973	-0.921941	0.259967	-3.54637	0.000390579	0.00625848
isogroup2157	Protein ETHE1 mitochondrial	9e-173	117.949	-1.51595	0.419852	-3.61068	0.000305394	0.00517468
isogroup216	Homeodomain-interacting protein kinase 2	2e-28	43.431	-2.85216	0.38464	-7.41514	1.21e-13	1.93e-11
isogroup2179	Chromosome 14 SCAF14645 whole genome shotgun sequence (Fragment)	2e-29	50.9076	0.972673	0.266112	3.65513	0.000257051	0.00449125
isogroup2188	Progranulin	3e-143	54.9399	1.32563	0.318662	4.15997	3.18e-05	0.000809925
isogroup2202	Apolipoprotein A-I	5e-114	41153.7	0.596313	0.141243	4.2219	2.42e-05	0.000640984
isogroup222	Complement C1r subcomponent	8e-147	5.15792	2.14029	0.527818	4.05499	5.01e-05	0.00117254
isogroup22201	Coagulation factor X	1e-59	205.879	3.69206	0.405383	9.1076	8.42e-20	2.54e-17
isogroup22259	Chromosome 6 open reading frame 136	5e-70	1.66974	-3.27562	0.895862	-3.65638	0.0002558	0.00447759
isogroup223	Cytochrome P450 2K1	8e-150	44.4104	-2.44159	0.387641	-6.29859	3e-10	2.78e-08
isogroup2247	C4H3.07c	3e-90	23.2977	0.709818	0.1769	4.01254	6.01e-05	0.00136247
isogroup225	Diminuto protein	2e-163	100.082	-1.34474	0.340689	-3.94713	7.91e-05	0.00169966
isogroup2252	SH3-domain GRB2 endophilin B2a (Fragment)	4e-101	4.05813	-2.20359	0.589745	-3.73652	0.000186584	0.00344525
isogroup2254	Eukaryotic translation initiation factor 3 subunit A	5e-15	62.9333	0.715226	0.202578	3.53062	0.000414579	0.0065767
isogroup2266	Farnesoid X receptor (Fragment)	2e-47	31.8297	0.919878	0.226378	4.06345	4.84e-05	0.00113543
isogroup2280	3-hydroxybutyrate dehydrogenase type 2	6e-140	30.3694	-0.97636	0.247399	-3.9465	7.93e-05	0.00170159
isogroup230	UDP-glucuronosyltransferase 2A1	3e-135	43.8852	5.23318	0.421364	12.4196	2.05e-35	2.44e-32
isogroup23072	C2 domain-containing protein	2e-53	66.674	1.84372	0.429565	4.29207	1.77e-05	0.000494428
isogroup23319	Protein strawberry notch	2e-08	9.00317	1.29238	0.378562	3.41393	0.000640331	0.00920339
isogroup23390	Protein SPT2 homolog	2e-30	6.9501	1.64817	0.415951	3.96242	7.42e-05	0.00161861
isogroup23483	Ubiquitin protein	9e-11	6.57374	1.86262	0.51966	3.58431	0.000337972	0.00561364
isogroup23514	UNC93 protein MFSD11	2e-37	7.78144	4.10626	0.624674	6.57344	4.92e-11	5.33e-09
isogroup23619	Adenosine receptor A2a (Fragment)	9e-30	2.43362	3.93815	0.669427	5.88286	4.03e-09	3.03e-07
isogroup2367	Eva1	3e-26	892.707	3.53677	0.453828	7.79319	6.53e-15	1.18e-12
isogroup23682	Chymotrypsinogen 1	6e-86	12.8773	1.45308	0.396496	3.66479	0.000247541	0.00435703
isogroup23865	Retinoic acid receptor RXR-beta-A	1e-50	17.1406	2.74401	0.319426	8.59046	8.66e-18	2.1e-15
isogroup2387	Ester hydrolase C11orf54 homolog	1e-154	112.65	-1.05928	0.247655	-4.27724	1.89e-05	0.000522908
isogroup23916	Tight junction protein ZO-3	7e-09	4.83866	-1.92663	0.487353	-3.95325	7.71e-05	0.00166424
isogroup24	Nuclear receptor subfamily 5 group A member 2	4e-158	37.8709	0.788275	0.230708	3.41677	0.000633692	0.00912874
isogroup2408	GTPase IMAP family member 8	6e-120	29.4724	0.93021	0.194406	4.78489	1.71e-06	6.86e-05
isogroup2414	NLTP	6e-86	101.579	-1.98564	0.234605	-8.46376	2.59e-17	5.88e-15
isogroup2420	FZD8 (Fragment)	8e-146	59.1059	-2.28187	0.3489	-6.54018	6.14e-11	6.51e-09
isogroup24226	DENN domain-containing protein 1C	3e-36	3.8951	1.77684	0.470087	3.77981	0.000156947	0.00298868
isogroup24259	CHCH domain-containing protein C22orf16 mitochondrial	3e-21	80.0846	0.910174	0.260752	3.49057	0.000481983	0.00740871
isogroup2449	C9orf123 homolog	9e-22	16.6503	-1.11734	0.268993	-4.15379	3.27e-05	0.000829176
isogroup24624	RENR	2e-71	1.57179	2.53646	0.746582	3.39743	0.000680232	0.00965558
isogroup24646	TERF1-interacting nuclear factor 2	1e-09	3.67706	-1.91409	0.54834	-3.4907	0.000481753	0.00740871
isogroup2465	AQP1	8e-176	44.2838	-1.53835	0.354261	-4.34242	1.41e-05	0.000405642
isogroup2494	Opioid growth factor receptor	2e-58	8.69209	-1.38143	0.367109	-3.76298	0.000167901	0.00316358
isogroup2503	Caspase-1 protein	2e-34	9.76552	1.61754	0.45145	3.58298	0.000339692	0.00563566
isogroup25178	GTPase IMAP family member 4	7e-41	8.33624	1.64501	0.471183	3.49123	0.000480797	0.00740535
isogroup252	Putative TBT binding protein	4e-64	16268.6	1.16323	0.255537	4.55212	5.31e-06	0.000181048
isogroup2545	ATP-binding cassette sub-family G member 2 isoform X1	4e-141	48.642	0.938268	0.197786	4.74385	2.1e-06	8.17e-05
isogroup2557	Gem-associated protein 4	4e-146	7.20991	-1.69462	0.452605	-3.74416	0.000181	0.0033573
isogroup25615	Retinoic acid receptor responder 3	2e-18	5.71443	1.55248	0.4549	3.4128	0.000642991	0.00923089
isogroup2563	Oligosaccharyltransferase complex subunit ostc	6e-101	63.9791	-1.08858	0.266768	-4.08062	4.49e-05	0.00107234
isogroup2572	Zinc-binding protein A33	1e-43	2814.71	0.982017	0.220194	4.45978	8.2e-06	0.00026073
isogroup2574	Sideroflexin-4	2e-73	5.15169	-1.92062	0.456444	-4.20779	2.58e-05	0.000675435
isogroup2577	Retinol dehydrogenase 16	6e-124	69.2113	4.00276	0.509044	7.8633	3.74e-15	6.9e-13
isogroup25801	Fibroblast growth factor receptor 1	2e-12	6.81103	4.24766	0.608896	6.97601	3.04e-12	3.95e-10
isogroup2595	Proteasome subunit beta type	3e-166	11.4607	-2.96398	0.579364	-5.11592	3.12e-07	1.54e-05
isogroup2599	Lysosomal membrane glycoprotein 2 (Fragment)	2e-19	7.82815	1.29784	0.319833	4.05786	4.95e-05	0.00116013
isogroup25990	Transposable element Tcb1 transposase	1e-29	3.61667	4.33461	0.681333	6.36196	1.99e-10	1.92e-08
isogroup26	UDP-glucuronosyltransferase 1-1	9e-173	43.8531	-1.82861	0.198694	-9.20318	3.47e-20	1.08e-17
isogroup260	Etoposide-induced protein 2.4 homolog	9e-154	57.6639	0.595919	0.142292	4.188	2.81e-05	0.000729104
isogroup26073	Chromosome 4 SCAF14752 whole genome shotgun sequence (Fragment)	3e-18	15.8859	-1.95558	0.521675	-3.74864	0.000177794	0.00330641
isogroup2620	Nuclear receptor subfamily 5 group A member 2 (Fragment)	5e-12	75.1151	0.70088	0.174223	4.02289	5.75e-05	0.00131649
isogroup26330	Pentaxin	1e-48	3.73197	-2.79224	0.690817	-4.04195	5.3e-05	0.00122966
isogroup26580	MXRA7 (Fragment)	2e-26	2.32781	-3.05632	0.677425	-4.51166	6.43e-06	0.000212192
isogroup2691	Maspardin	6e-24	11.8499	-0.991688	0.289625	-3.42405	0.000616957	0.00894837
isogroup27004	NADH-ubiquinone oxidoreductase chain 3	3e-28	174.698	1.59717	0.288042	5.54491	2.94e-08	1.89e-06
isogroup2701	Fc of IgE high affinity I receptor for gamma polypeptide	1e-33	10.2956	1.47621	0.320644	4.6039	4.15e-06	0.000146615
isogroup27083	Crystallin zeta (Quinone reductase) (Fragment)	3e-15	39.5689	-0.934915	0.275087	-3.39862	0.000677278	0.0096232
isogroup27170	Par-3 partitioning defective 3 homolog (Fragment)	5e-18	4.81638	2.75864	0.508082	5.42952	5.65e-08	3.44e-06
isogroup2743	Glutathione S-transferase Mu 3	4e-143	169.801	-1.75654	0.31774	-5.52821	3.24e-08	2.05e-06
isogroup2757	Glucagon receptor	1e-53	3.08102	-2.74109	0.622431	-4.40384	1.06e-05	0.00032248
isogroup27720	Homocysteine-responsive endoplasmic reticulum-resident ubiquitin domain member 2 protein	5e-09	17.2187	2.87587	0.348653	8.24854	1.6e-16	3.45e-14
isogroup2784	Alpha2-macroglobulin (Fragment)	1e-99	38.967	-3.50872	0.611525	-5.73765	9.6e-09	6.75e-07
isogroup2785	Histamine n-methyltransferase (Fragment)	8e-152	834.888	-0.864061	0.149728	-5.77088	7.89e-09	5.65e-07
isogroup27951	CPEB4	3e-76	1.72863	2.88763	0.799159	3.61333	0.000302286	0.0051281
isogroup28205	Ubiquitin specific peptidase like 1	2e-09	2.47681	3.3984	0.664417	5.11486	3.14e-07	1.55e-05
isogroup28244	Dual-specificity tyrosine-(Y)-phosphorylation regulated kinase 3	9e-21	29.9918	-1.3986	0.271364	-5.15397	2.55e-07	1.3e-05
isogroup2830	Natterin protein	1e-125	37.8398	2.42032	0.474901	5.09646	3.46e-07	1.69e-05
isogroup28682	1-acyl-sn-glycerol-3-phosphate acyltransferase delta	8e-30	5.06875	4.16568	0.579021	7.19435	6.28e-13	9.07e-11
isogroup28759	Zinc finger protein 721	3e-44	6.49349	-1.33594	0.379237	-3.52271	0.000427161	0.00673892
isogroup2885	Proprotein convertase subtilisin/kexin type 6	5e-121	1.31586	-2.68184	0.733958	-3.65395	0.00025824	0.00450652
isogroup2887	3-oxo-5-beta-steroid 4-dehydrogenase	2e-163	199.52	-1.10548	0.171282	-6.45415	1.09e-10	1.1e-08
isogroup28909	Sterile alpha motif domain-containing 9 protein (Fragment)	7e-39	1.8827	3.2516	0.774739	4.19703	2.7e-05	0.000705224
isogroup2893	Zona pellucida sperm-binding protein 3	3e-18	104.331	1.21587	0.219639	5.53579	3.1e-08	1.97e-06
isogroup2911	Selenoprotein K	3e-23	121.93	-0.543154	0.148344	-3.66145	0.000250787	0.00440062
isogroup29782	Dihydropyridine-sensitive L-type skeletal muscle calcium channel subunit alpha-1	3e-65	1.01564	-3.19573	0.75091	-4.2558	2.08e-05	0.000566558
isogroup2980	Enoyl-Coenzyme A hydratase/3-hydroxyacyl Coenzyme A dehydrogenase (Fragment)	5e-79	145.969	-2.22411	0.191281	-11.6275	2.99e-31	2.59e-28
isogroup29809	Stonustoxin subunit alpha	3e-57	2.13871	-2.77893	0.771487	-3.60205	0.000315721	0.00532445
isogroup2983	Ribose-phosphate pyrophosphokinase 1	1e-129	2.45585	2.33428	0.594142	3.92883	8.54e-05	0.00181112
isogroup30	Monocarboxylate transporter 2	3e-176	124.13	-0.634869	0.143626	-4.42029	9.86e-06	0.000302492
isogroup3023	Nuclear receptor coactivator 4	2e-20	371.428	-1.81899	0.320536	-5.67483	1.39e-08	9.55e-07
isogroup3049	Interferon-induced protein 44	1e-38	6.71383	2.61532	0.5055	5.17373	2.29e-07	1.18e-05
isogroup305	Anti-Mullerian hormone	1e-156	11.0586	2.17475	0.553584	3.92848	8.55e-05	0.00181112
isogroup307	Chromosome 17 SCAF14563 whole genome shotgun sequence (Fragment)	1e-06	67.8038	-0.887913	0.244354	-3.63372	0.000279363	0.004799
isogroup3085	Solute carrier family 12 member 5	4e-40	36.0041	2.07226	0.392912	5.2741	1.33e-07	7.48e-06
isogroup31185	Ubiquitin	2e-34	8.29874	-4.86535	0.668973	-7.27286	3.52e-13	5.27e-11
isogroup31221	3-oxo-5-beta-steroid 4-dehydrogenase	2e-56	5.79713	-2.45436	0.539691	-4.54772	5.42e-06	0.000184
isogroup31299	Lysozyme g	2e-70	1.78821	2.76085	0.78056	3.53701	0.00040468	0.00644469
isogroup31318	Ependymin	1e-06	77.6059	-6.03116	0.572999	-10.5256	6.58e-26	3.62e-23
isogroup31363	Protein transport protein Sec61 subunit gamma	9e-20	294.859	-0.886769	0.230203	-3.85211	0.000117103	0.00236038
isogroup3137	Protein disulfide-isomerase	5e-176	25.8018	1.25807	0.355042	3.54344	0.000394949	0.00631433
isogroup3138	Chromobox protein homolog 3	3e-73	19.4595	1.13463	0.273288	4.15177	3.3e-05	0.000832835
isogroup31435	Eukaryotic translation initiation factor 2 subunit 1 (Fragment)	8e-29	4.14338	1.86316	0.464027	4.0152	5.94e-05	0.00135254
isogroup31605	Serum lectin isoform 3	1e-23	27.9796	-2.38058	0.592985	-4.01458	5.96e-05	0.00135505
isogroup3175	PPUP2357 (Fragment)	8e-09	24.7898	-1.23373	0.313998	-3.92911	8.53e-05	0.00181093
isogroup31771	Magnesium transporter NIPA2	2e-41	1.94793	2.74652	0.716121	3.83528	0.000125424	0.00248089
isogroup3182	Insulin growth factor-binding 7 protein	3e-100	34.2812	-0.689934	0.187892	-3.67197	0.000240687	0.00425209
isogroup3191	UPF0729 protein	2e-44	69.7854	-0.924601	0.194099	-4.76356	1.9e-06	7.51e-05
isogroup3203	Dihydrofolate reductase	6e-117	50.5073	-2.25479	0.241017	-9.3553	8.34e-21	2.81e-18
isogroup32065	Solute carrier family 22 member 16	5e-32	30.3637	-1.19693	0.273025	-4.38398	1.17e-05	0.000345036
isogroup3215	Nucleoside diphosphate kinase	7e-100	3.0894	2.44456	0.602908	4.05461	5.02e-05	0.00117346
isogroup3222	Antigen peptide transporter 2	6e-51	13.6948	-1.10897	0.322242	-3.44143	0.000578656	0.00851813
isogroup325	Angiopoietin-related protein 3	2e-119	463.924	1.28455	0.27203	4.72208	2.33e-06	8.92e-05
isogroup3253	Protein FRA10AC1	2e-75	131.233	-1.4027	0.180868	-7.75541	8.81e-15	1.57e-12
isogroup3254	Cystatin	3e-70	1697.72	-0.831222	0.176029	-4.72207	2.33e-06	8.92e-05
isogroup3277	CHMP5 (Fragment)	4e-129	7.78857	-2.226	0.451491	-4.93035	8.21e-07	3.62e-05
isogroup3281	DNA-directed RNA polymerase subunit	3e-67	6.09364	2.01249	0.383798	5.24362	1.57e-07	8.53e-06
isogroup330	Sterol 26-hydroxylase mitochondrial	6e-154	45.9414	2.99542	0.258223	11.6001	4.11e-31	3.37e-28
isogroup3301	Cytochrome b5 type A (Microsomal)	4e-76	19.9218	1.8776	0.363215	5.16938	2.35e-07	1.2e-05
isogroup33149	Pentaxin	3e-11	1730.86	-2.82927	0.530511	-5.3331	9.65e-08	5.57e-06
isogroup3320	Cystatin	4e-39	739.164	1.22698	0.12701	9.66048	4.44e-22	1.69e-19
isogroup33206	C1q protein	1e-28	51.3409	-5.21768	0.852218	-6.12248	9.21e-10	7.82e-08
isogroup33207	C1q protein	3e-28	22.7743	-3.97671	0.869714	-4.57243	4.82e-06	0.000166532
isogroup3329	C3orf1 homolog	3e-19	3.10062	2.1144	0.573856	3.68454	0.000229112	0.0040829
isogroup333	Cytochrome P450 2J2	2e-132	144.382	4.55171	0.332493	13.6897	1.17e-42	2.39e-39
isogroup33702	Neoverrucotoxin subunit alpha (Fragment)	7e-41	6.78037	4.34188	0.928901	4.67421	2.95e-06	0.000109609
isogroup338	Hyaluronan-binding protein 2	9e-141	730.082	1.86803	0.431816	4.32599	1.52e-05	0.000432152
isogroup3382	Chromosome 2 SCAF8387 whole genome shotgun sequence	3e-11	16.8513	-1.22596	0.3286	-3.73087	0.00019082	0.00350254
isogroup33866	C1q protein	2e-19	37.8828	2.69925	0.460094	5.86673	4.44e-09	3.33e-07
isogroup339	Selenoprotein P	2e-79	9894.38	-0.767423	0.151813	-5.05505	4.3e-07	2.05e-05
isogroup3395	MANBAL	3e-38	11.2756	0.985012	0.241883	4.07227	4.66e-05	0.00110233
isogroup3397	ADP-ribosylation factor 13B protein	3e-111	10.4801	1.79284	0.397954	4.50514	6.63e-06	0.00021781
isogroup33970	Transporter (Fragment)	8e-70	0.916601	2.77643	0.782015	3.55035	0.00038472	0.00619233
isogroup3400	Chromobox protein (Fragment)	6e-34	7.46387	-1.32551	0.378774	-3.49947	0.000466177	0.00723473
isogroup34148	Chromosome 11 SCAF14979 whole genome shotgun sequence	4e-37	2.4997	2.25498	0.620232	3.6357	0.000277223	0.00476796
isogroup3423	Cutaneous T-cell lymphoma-associated antigen 5	3e-141	5.51803	1.50345	0.408189	3.68323	0.000230301	0.00409719
isogroup3433	Glycine C-acetyltransferase	5e-178	40.6599	0.81423	0.218845	3.72058	0.000198763	0.00363261
isogroup3442	UDP-glucuronosyltransferase	2e-105	8.17639	1.15688	0.336967	3.43321	0.000596488	0.00871781
isogroup3473	Starch-binding domain-containing protein 1	3e-91	12.4679	-1.90911	0.344501	-5.54168	3e-08	1.92e-06
isogroup3485	Shroom family member 2	5e-114	1.99928	1.98259	0.55643	3.56306	0.000366556	0.00595356
isogroup3500	Pentaxin	2e-116	12.226	-1.83956	0.534076	-3.44437	0.000572393	0.00845531
isogroup351	Interferon-induced protein 44	1e-07	7.93838	1.20103	0.349694	3.43451	0.000593618	0.00868918
isogroup3511	LRIG1	7e-11	16.5404	2.90579	0.465352	6.24429	4.26e-10	3.84e-08
isogroup35209	Chromosome 2 SCAF8387 whole genome shotgun sequence	2e-09	30.4325	-6.79347	0.713744	-9.51808	1.76e-21	6.28e-19
isogroup3523	Aquaporin-8	3e-138	7.98744	5.59296	0.645491	8.66465	4.53e-18	1.16e-15
isogroup35493	Actin-related protein 2/3 complex subunit 5	3e-42	5.28183	5.10227	0.626125	8.14895	3.67e-16	7.63e-14
isogroup3554	Proteasome subunit alpha type	4e-171	16.4984	-2.16834	0.346523	-6.25741	3.91e-10	3.55e-08
isogroup35774	RNA-binding protein 42	2e-44	7.0708	-1.29709	0.374263	-3.46571	0.000528842	0.00792348
isogroup35857	Putative methyltransferase	5e-43	27.7665	-3.46164	0.449078	-7.70833	1.27e-14	2.25e-12
isogroup359	N(G)N(G)-dimethylarginine dimethylaminohydrolase 1	1e-102	26.5306	-2.32345	0.365282	-6.36071	2.01e-10	1.93e-08
isogroup3592	Folate receptor alpha	1e-140	25.6762	-3.03942	0.603552	-5.03589	4.76e-07	2.22e-05
isogroup3604	RT nLTR: Non-LTR (Long terminal repeat) retrotransposon and domain-containing protein (Fragment)	5e-42	14.9514	4.40217	0.388436	11.3331	9e-30	6.6e-27
isogroup36119	Complement C1q protein 2	8e-37	28.4926	5.20851	0.552433	9.42831	4.17e-21	1.42e-18
isogroup3654	Reverse transcriptase protein	2e-28	6.39314	-2.59274	0.571918	-4.53341	5.8e-06	0.000194158
isogroup367	Protein SSUH2 homolog	2e-79	74.7531	-0.851182	0.225778	-3.77	0.000163246	0.00308602
isogroup368	Clusterin	7e-123	40.9633	-2.32421	0.506861	-4.58549	4.53e-06	0.00015837
isogroup3692	Rhomboid-related protein 4	2e-33	14.7237	-1.25003	0.318865	-3.92023	8.85e-05	0.00186184
isogroup36940	NEDD4 family-interacting protein 2	2e-45	69.1087	-1.98149	0.385007	-5.14662	2.65e-07	1.34e-05
isogroup3715	G-protein coupled pyrimidinergic receptor P2Y4	2e-41	2.41861	3.78338	0.599377	6.3122	2.75e-10	2.56e-08
isogroup37168	Lectin C-type domain containing protein	2e-23	105.153	5.2178	0.612421	8.51995	1.6e-17	3.77e-15
isogroup3721	Lysozyme C	2e-38	2891.66	1.10716	0.262841	4.21227	2.53e-05	0.000663402
isogroup37317	Programmed cell death protein 4 (Fragment)	2e-35	11.0488	-1.67474	0.357426	-4.68554	2.79e-06	0.000104396
isogroup3735	F-actin-capping protein subunit beta	3e-180	45.3297	2.15292	0.339754	6.33671	2.35e-10	2.25e-08
isogroup3737	TCTP	4e-79	3446.57	-0.750048	0.122101	-6.14286	8.11e-10	6.94e-08
isogroup3754	Probable tRNA N6-adenosine threonylcarbamoyltransferase	6e-156	12.8719	1.03881	0.260923	3.98129	6.85e-05	0.00151268
isogroup3764	Prostaglandin D synthase	3e-76	6065.39	0.683013	0.194723	3.50761	0.00045215	0.00705722
isogroup3793	ITGAL	8e-73	74.6889	1.09496	0.202778	5.39976	6.67e-08	4e-06
isogroup37986	NADH-ubiquinone oxidoreductase chain 1	1e-38	12.6331	3.9159	0.424731	9.21972	2.98e-20	9.57e-18
isogroup3808	Erythromycin 3-O-methyltransferase	3e-10	42.4591	-1.0165	0.238156	-4.26822	1.97e-05	0.000540849
isogroup3840	Glycolipid transfer protein domain containing 2 (Fragment)	4e-39	45.9235	1.59979	0.275996	5.79643	6.77e-09	4.91e-07
isogroup38768	Protein max	4e-66	3.05015	1.73139	0.504496	3.43193	0.000599303	0.00874752
isogroup38877	Hydroxysteroid (11-beta) dehydrogenase 1 (Fragment)	3e-68	4.72997	-1.95868	0.578551	-3.38549	0.000710505	0.00997148
isogroup38883	Cytochrome c oxidase subunit 2	2e-37	9.69526	-5.97702	0.662637	-9.02006	1.88e-19	5.43e-17
isogroup39074	Cytochrome c oxidase subunit 2	3e-38	10.961	-5.85303	0.650469	-8.99817	2.3e-19	6.56e-17
isogroup3949	5-hydroxyisourate hydrolase	9e-60	13.0266	0.991415	0.280637	3.53273	0.000411294	0.00653546
isogroup3953	Glutathione peroxidase	4e-121	135.009	1.05658	0.242953	4.3489	1.37e-05	0.000394893
isogroup39741	Cytochrome c oxidase subunit 2	8e-38	10.4565	-6.10924	0.659778	-9.25954	2.05e-20	6.67e-18
isogroup39874	Interferon regulatory factor 9 (Fragment)	2e-33	4.44446	-2.84719	0.542142	-5.25175	1.51e-07	8.26e-06
isogroup3990	Protein canopy-1	3e-78	31.4142	1.25803	0.355909	3.53468	0.00040827	0.00649102
isogroup40192	CDC23 (Cell division cycle 23 yeast homolog)	1e-57	2.0482	2.025	0.582743	3.47494	0.00051097	0.00774279
isogroup4021	ATP synthase subunit a	1e-70	1540.56	5.42697	0.26229	20.6908	4.2e-95	1.2e-90
isogroup4028	L-rhamnose-binding lectin SML	1e-82	8.5782	-4.66402	0.818795	-5.6962	1.23e-08	8.5e-07
isogroup4035	Solute carrier family 27 member 2	4e-114	48.1311	5.98407	0.509463	11.7459	7.42e-32	6.84e-29
isogroup4043	Ca2+-dependent complex c1r/c1S subunit (Fragment)	9e-103	22.5985	-5.4004	0.875107	-6.17113	6.78e-10	5.93e-08
isogroup405	Serum paraoxonase/arylesterase 2	3e-127	122.107	1.55926	0.154258	10.1082	5.08e-24	2.51e-21
isogroup40508	Sacsin	1e-20	42.1883	3.93489	0.754586	5.21463	1.84e-07	9.76e-06
isogroup40607	Complement factor H	3e-30	7.2044	-4.28165	0.675407	-6.33937	2.31e-10	2.21e-08
isogroup40811	Glycolipid transfer protein domain-containing protein 1	1e-22	1.60058	-3.48008	0.846468	-4.1113	3.93e-05	0.000962641
isogroup4083	Large neutral amino acids transporter small subunit 3	3e-108	12.8927	2.53777	0.369031	6.87684	6.12e-12	7.58e-10
isogroup409	Interleukin-6 receptor A	3e-168	8.68058	1.50816	0.421008	3.58226	0.000340637	0.00564479
isogroup4094	Small ubiquitin-related modifier 2	2e-59	21.0928	-0.909521	0.229063	-3.97061	7.17e-05	0.00157003
isogroup41098	Sodium-coupled neutral amino acid transporter 4	5e-22	3.36303	2.27194	0.670552	3.38816	0.000703631	0.00989929
isogroup413	DMBT1	2e-35	23.1152	-0.8842	0.253436	-3.48884	0.000485118	0.00744281
isogroup4138	Envelope polyprotein	2e-17	5.99053	2.98539	0.652837	4.57295	4.81e-06	0.000166415
isogroup415	3-hydroxyanthranilate 34-dioxygenase	2e-178	278.824	-1.51033	0.185348	-8.1486	3.68e-16	7.63e-14
isogroup41615	Alpha amylase (Fragment)	8e-69	3.18251	-2.82442	0.600382	-4.70437	2.55e-06	9.62e-05
isogroup41668	Rho GTPase-activating protein 12	6e-19	3.98992	3.68705	0.613014	6.01462	1.8e-09	1.45e-07
isogroup417	Asparaginase homolog	2e-165	42.2592	2.12835	0.317016	6.71371	1.9e-11	2.19e-09
isogroup41723	PPUP3880	6e-41	8.56304	1.83529	0.461266	3.97881	6.93e-05	0.0015262
isogroup4222	Ribonuclease P protein subunit p30	1e-154	3.02565	1.70731	0.495921	3.44271	0.000575906	0.00849076
isogroup4223	Zgc:123060	4e-26	5.30528	3.83535	0.648779	5.91164	3.39e-09	2.6e-07
isogroup4243	Metalloendopeptidase	1e-162	274.259	1.45374	0.417283	3.48383	0.000494297	0.00753618
isogroup42430	Dsc2l protein (Fragment)	9e-11	4.21153	1.84956	0.472864	3.9114	9.18e-05	0.00191857
isogroup4260	SMAP2 (Fragment)	6e-93	8.21897	-1.68106	0.468923	-3.58493	0.000337173	0.00560362
isogroup4266	NADH dehydrogenase [ubiquinone] 1 beta subcomplex subunit 3	5e-54	97.7287	-0.693625	0.179905	-3.85551	0.000115491	0.00233796
isogroup4267	Alpha-enolase	6e-126	14.6655	1.54588	0.391196	3.95168	7.76e-05	0.00167396
isogroup43018	Serum lectin isoform 3	4e-18	460.537	-7.48351	0.373984	-20.0102	4.49e-89	6.41e-85
isogroup431	Coagulation factor X	5e-57	159.984	-0.552577	0.152812	-3.61607	0.000299114	0.00508333
isogroup43139	Metalloendopeptidase (Fragment)	2e-56	4.68598	3.02294	0.57572	5.25071	1.52e-07	8.29e-06
isogroup434	Chromosome 2 SCAF8387 whole genome shotgun sequence	7e-18	492.359	-2.79825	0.824726	-3.39295	0.000691444	0.00977718
isogroup43400	Murinoglobulin-2	7e-54	3.92785	3.48309	0.635186	5.48358	4.17e-08	2.59e-06
isogroup43605	RTJK (Fragment)	6e-12	2.41745	-3.20223	0.804429	-3.98075	6.87e-05	0.00151498
isogroup43766	Acid sphingomyelinase phosphodiesterase 3a protein	2e-45	6.42743	2.37564	0.457342	5.19445	2.05e-07	1.07e-05
isogroup43821	ATP synthase subunit a (Fragment)	7e-34	1067.95	-2.93063	0.363936	-8.05261	8.1e-16	1.66e-13
isogroup4415	Putative tRNA (cytidine(32)/guanosine(34)-2-O)-methyltransferase	1e-106	8.00315	-1.43929	0.365678	-3.93596	8.29e-05	0.00176742
isogroup44170	Complement component 1s	1e-41	3.33877	1.81355	0.49205	3.6857	0.000228079	0.00406956
isogroup4428	Pyridine nucleotide-disulfide oxidoreductase domain-containing protein 2	5e-163	13.1258	2.02157	0.561938	3.5975	0.00032129	0.00539292
isogroup443	Beta-microseminoprotein (Fragment)	1e-28	294.589	1.50879	0.34185	4.41362	1.02e-05	0.000310308
isogroup4438	NADPH--cytochrome P450 reductase	2e-148	34.3858	3.72986	0.473574	7.87599	3.38e-15	6.28e-13
isogroup4445	tRNA methyltransferase 1 homolog	2e-111	11.5698	3.6056	0.482293	7.47595	7.66e-14	1.25e-11
isogroup44556	Insulin growth factor 2 mRNA-binding protein 2	2e-26	5.15572	2.2742	0.546146	4.16409	3.13e-05	0.00079828
isogroup448	Sulfotransferase	9e-85	590.721	-1.68284	0.148102	-11.3627	6.41e-30	4.83e-27
isogroup4491	Chymotrypsin elastase family member 2A	3e-120	3300.27	1.41322	0.385121	3.66955	0.000242979	0.00428729
isogroup45068	Ogt protein	1e-49	20.1669	1.61656	0.387387	4.17299	3.01e-05	0.000771179
isogroup45312	Histone H2AX	1e-46	5.40874	-3.02603	0.689837	-4.38659	1.15e-05	0.000341634
isogroup45553	Dehydrogenase/reductase SDR family member 11	1e-42	17.5588	-1.6972	0.353191	-4.80533	1.54e-06	6.29e-05
isogroup457	Membrane-spanning 4-domains subfamily A member 4A	1e-82	69.7505	1.62854	0.353417	4.60797	4.07e-06	0.000144837
isogroup46011	Receptor-type tyrosine-protein phosphatase beta	7e-47	4.58032	2.6642	0.517175	5.15145	2.58e-07	1.32e-05
isogroup4607	Cytochrome b-c1 complex subunit 6 mitochondrial	1e-34	42.1689	-0.589024	0.170948	-3.44563	0.000569734	0.00842146
isogroup4608	Chromosome 9 SCAF14991 whole genome shotgun sequence (Fragment)	2e-160	3.74847	4.19416	0.672862	6.23331	4.57e-10	4.08e-08
isogroup46198	Apolipoprotein C-I	3e-08	5227.25	1.07854	0.243524	4.42888	9.47e-06	0.00029321
isogroup46227	LINE-1 retrotransposable element ORF2 protein	1e-06	1.58187	-3.1699	0.757779	-4.18315	2.88e-05	0.00074149
isogroup463	Cytochrome P450 2G1	2e-162	600.376	-1.46159	0.253085	-5.77509	7.69e-09	5.53e-07
isogroup46395	Zinc-binding protein A33	4e-49	2.75137	-3.99696	0.767283	-5.20924	1.9e-07	1e-05
isogroup464	Family with sequence similarity 3 member C	1e-17	22.2522	3.46043	0.295769	11.6998	1.28e-31	1.14e-28
isogroup46408	Alpha-1-antitrypsin	2e-17	1323.49	1.22482	0.270092	4.53483	5.77e-06	0.000193536
isogroup4685	Apolipoprotein B-100	3e-166	44.0139	2.0901	0.305627	6.83871	7.99e-12	9.64e-10
isogroup471	Vesicle-associated membrane protein 8	4e-39	27.0113	1.01994	0.256721	3.97294	7.1e-05	0.00155831
isogroup47200	TMLH (Fragment)	6e-49	1.35036	-3.19607	0.725275	-4.4067	1.05e-05	0.000319363
isogroup47252	TOX high mobility group box family member 2 (Fragment)	1e-15	2.53774	1.94186	0.522361	3.71747	0.000201229	0.00367298
isogroup473	UDP-glucuronosyltransferase 2B4	3e-127	197.862	-5.50437	0.358601	-15.3496	3.56e-53	1.46e-49
isogroup4737	Krueppel factor 4	6e-41	21.3172	4.88135	0.540403	9.0328	1.67e-19	4.9e-17
isogroup474	Suppressor of SWI4 1 homolog	4e-173	20.7622	2.05764	0.514204	4.0016	6.29e-05	0.00141252
isogroup4749	Teneurin-3	2e-52	23.7182	3.96418	0.40842	9.70614	2.84e-22	1.11e-19
isogroup47529	Zinc transporter ZIP9	5e-06	13.0036	1.85981	0.336579	5.52562	3.28e-08	2.08e-06
isogroup476	Phosphatidate phosphatase LPIN2	6e-107	3.83125	1.66656	0.487374	3.41946	0.000627454	0.00905015
isogroup4807	325-bisphosphate nucleotidase 1 (Fragment)	7e-63	10.6065	-1.2224	0.360324	-3.3925	0.000692574	0.00978706
isogroup48228	Serine/arginine-rich splicing factor 3 (Fragment)	1e-07	4.47033	-2.20371	0.516695	-4.26502	2e-05	0.000547102
isogroup483	7-alpha-hydroxycholest-4-en-3-one 12-alpha-hydroxylase	6e-167	203.188	4.88507	0.31221	15.6468	3.5e-55	2e-51
isogroup4850	Tectonic-3	3e-154	6.4349	2.25537	0.529077	4.26284	2.02e-05	0.000551922
isogroup488	Small heterodimer partner (Fragment)	4e-127	29.9127	-1.57791	0.388116	-4.06557	4.79e-05	0.00112702
isogroup4884	Sperm-associated antigen 7 homolog	1e-136	3.74786	1.7417	0.495662	3.51389	0.000441594	0.00693661
isogroup48919	Cytosolic sulfotransferase 1	2e-09	6.22351	2.66294	0.549703	4.84432	1.27e-06	5.28e-05
isogroup48929	Niemann-Pick C1 protein 1	1e-25	3.31093	-4.16925	0.667933	-6.24202	4.32e-10	3.89e-08
isogroup490	Ribonuclease T2	8e-109	17.2674	2.14119	0.40658	5.26635	1.39e-07	7.71e-06
isogroup4908	C-factor	4e-142	5.57357	1.97062	0.484827	4.06459	4.81e-05	0.00113086
isogroup4947	Pancreatic progenitor cell differentiation and proliferation factor	1e-54	421.641	1.69461	0.477183	3.55128	0.000383357	0.00617385
isogroup49978	Glycerophosphodiester phosphodiesterase domain-containing protein 1	9e-31	1.4861	-3.33689	0.810279	-4.1182	3.82e-05	0.000942144
isogroup4998	Transmembrane protein 258 (Fragment)	3e-35	241.92	-0.607475	0.154914	-3.92138	8.8e-05	0.00185575
isogroup500	Guanine nucleotide-binding protein 3	2e-154	19.3305	1.37554	0.297642	4.62145	3.81e-06	0.000136819
isogroup50080	Protein quaking-A	4e-14	5.18879	-1.7643	0.438329	-4.02506	5.7e-05	0.00130849
isogroup50190	Heterogeneous nuclear ribonucleoprotein K	1e-14	2.49729	2.78954	0.716776	3.89179	9.95e-05	0.00205942
isogroup50281	Insulin growth factor binding protein-2a	8e-63	7.66091	1.59957	0.412026	3.88222	0.000103508	0.00212988
isogroup50357	Family with sequence similarity 65 member A	3e-53	4.22711	-1.75111	0.50115	-3.49419	0.000475497	0.00734747
isogroup506	Protein lifeguard 4	5e-129	25.4002	1.05397	0.202892	5.19472	2.05e-07	1.07e-05
isogroup5069	Cytochrome P450 family 26 subfamily C polypeptide 1	1e-40	718.492	4.57695	0.625604	7.31604	2.55e-13	3.84e-11
isogroup5088	Teneurin-3	5e-55	6.48224	1.49186	0.440306	3.38823	0.000703453	0.00989929
isogroup511	Arylsulfatase G	4e-93	34.262	-1.02148	0.208026	-4.91035	9.09e-07	3.97e-05
isogroup51474	Immune-type receptor 1o allele 4	2e-26	53.9116	1.45396	0.426434	3.40958	0.000650641	0.00930947
isogroup51716	DDT4L	4e-08	3.67977	3.74056	0.800541	4.67254	2.98e-06	0.000110366
isogroup51846	Myeloid-associated differentiation marker	5e-24	2.69145	-2.94412	0.696333	-4.22803	2.36e-05	0.00062666
isogroup51862	RNA-directed DNA polymerase from mobile element jockey	3e-10	2.75619	3.38474	0.832462	4.06594	4.78e-05	0.00112702
isogroup5195	KCC2D	4e-95	54.7768	1.37511	0.25472	5.39853	6.72e-08	4.02e-06
isogroup52	Chromosome 1 open reading frame 51	4e-113	25.1426	2.86847	0.847166	3.38596	0.000709295	0.00995938
isogroup5254	Transmembrane protease serine 2	3e-93	12.2647	2.10522	0.399572	5.26869	1.37e-07	7.66e-06
isogroup529	2-hydroxyacyl-CoA lyase	3e-144	17.3952	-1.40342	0.30718	-4.56872	4.91e-06	0.000169102
isogroup52940	Fanconi anemia complementation group E	3e-30	3.91626	2.5022	0.716144	3.494	0.000475846	0.0073489
isogroup52982	Trinucleotide repeat containing 18 (Fragment)	1e-17	16.5039	1.09493	0.312361	3.50535	0.000456016	0.00710325
isogroup532	Biotinidase	5e-148	115.194	1.86701	0.267217	6.98687	2.81e-12	3.69e-10
isogroup5322	Calcium and integrin-binding protein 1	7e-111	20.802	-1.03421	0.241381	-4.28454	1.83e-05	0.000509001
isogroup5373	Chromosome 7 SCAF13760 whole genome shotgun sequence	1e-40	312.525	-1.34873	0.23348	-5.77662	7.62e-09	5.49e-07
isogroup538	Triple QxxK/R motif-containing protein (Fragment)	4e-45	16.0201	-1.59216	0.44916	-3.54474	0.000392999	0.00629018
isogroup5393	Transposable element Tcb1 transposase	1e-16	69.9747	7.35417	0.503479	14.6067	2.55e-48	8.09e-45
isogroup540	Interferon-related developmental regulator 1	5e-175	54.5168	1.44379	0.281907	5.12149	3.03e-07	1.5e-05
isogroup54081	Chromosome 15 open reading frame 39	1e-27	3.49455	4.13073	0.879856	4.69477	2.67e-06	0.000100183
isogroup5420	Microfibril-associated 4 (Fragment)	6e-121	119.996	2.43461	0.683073	3.56421	0.000364956	0.00593769
isogroup546	Small VCP/p97-interacting protein	1e-08	67.1496	0.74048	0.2088	3.54637	0.00039058	0.00625848
isogroup5474	Transmembrane emp24 domain-containing protein 11	2e-78	13.7125	2.21231	0.487057	4.54221	5.57e-06	0.000187835
isogroup5483	Putative ribosome biogenesis protein RLP24	2e-111	400.291	-0.846413	0.211172	-4.00817	6.12e-05	0.00138352
isogroup550	CLPTM1 membrane protein cnrB	6e-117	7.79855	-1.819	0.491211	-3.70311	0.000212976	0.00385541
isogroup5559	Microfibrillar-associated protein 4 type I	3e-116	1521.19	2.93581	0.403838	7.26977	3.6e-13	5.34e-11
isogroup56171	Ceramide synthase 6	3e-26	6.16032	1.7951	0.455476	3.94114	8.11e-05	0.00173872
isogroup562	RDH2 (Fragment)	1e-89	101.368	-2.42186	0.243742	-9.93613	2.9e-23	1.26e-20
isogroup56316	Inositol monophosphatase 1	6e-24	2.90267	2.88732	0.569075	5.07371	3.9e-07	1.88e-05
isogroup567	Cytochrome P450 2W1	1e-124	90.9284	3.15042	0.357154	8.8209	1.14e-18	3.06e-16
isogroup568	OCIA domain-containing protein 2	1e-42	127.356	-0.599847	0.155583	-3.85549	0.0001155	0.00233796
isogroup56848	Serine proteinase inhibitor (Fragment)	4e-41	90.1962	4.87213	0.473707	10.2851	8.23e-25	4.28e-22
isogroup569	Transmembrane 9 superfamily member	3e-99	61.6993	3.79841	0.29547	12.8555	8.01e-38	9.97e-35
isogroup5700	ORF1a	6e-10	8.02599	-4.77118	0.679361	-7.02304	2.17e-12	2.89e-10
isogroup571	Phosphatidylserine synthase 1	2e-56	43.0003	1.06346	0.220947	4.81317	1.49e-06	6.07e-05
isogroup572	4-trimethylaminobutyraldehyde dehydrogenase	5e-179	142.106	3.07365	0.233999	13.1353	2.07e-39	3.28e-36
isogroup5749	STAG2 (Fragment)	1e-80	35.761	1.27804	0.253899	5.03366	4.81e-07	2.24e-05
isogroup57767	Apolipoprotein B-100	4e-23	3.44972	3.54529	0.555949	6.37701	1.81e-10	1.76e-08
isogroup5807	GTP cyclohydrolase 1	6e-113	12.9946	2.52648	0.615212	4.10667	4.01e-05	0.000977928
isogroup582	ADP-ribosylation factor 14 effector protein	3e-126	5.31616	2.12691	0.496553	4.28334	1.84e-05	0.000511247
isogroup5825	General transcription factor IIH polypeptide 4	1e-146	11.2001	-1.24914	0.322128	-3.87776	0.000105424	0.00215999
isogroup58382	Abnormal spindle microcephaly-associated protein	1e-12	2.07852	2.67718	0.599849	4.46309	8.08e-06	0.000257314
isogroup584	Glucose-6-phosphate 1-dehydrogenase (Fragment)	3e-179	32.1013	-1.36902	0.283777	-4.82428	1.41e-06	5.78e-05
isogroup5872	Merlin	3e-56	55.1319	3.01329	0.72828	4.13754	3.51e-05	0.000875393
isogroup58990	PTPRB	7e-46	3.03568	2.39	0.688701	3.4703	0.000519879	0.00783434
isogroup59904	Malate synthase A MSA domain-containing protein	5e-16	1.24298	2.78893	0.745437	3.74134	0.000183042	0.00339297
isogroup5994	Complement component C3 (Fragment)	5e-98	85.6478	-1.35167	0.32108	-4.20976	2.56e-05	0.000670189
isogroup60	Histidine ammonia-lyase	1e-31	272.502	-0.589704	0.164677	-3.58097	0.000342323	0.00566616
isogroup600	Ammonium transporter Rh type B-B	3e-174	3.16571	2.57308	0.595256	4.32264	1.54e-05	0.000437891
isogroup6011	GTPase IMAP family member 4	2e-15	11.1733	-3.1619	0.421674	-7.49845	6.46e-14	1.06e-11
isogroup60228	Lethal(2) giant larvae protein	3e-25	4.24221	2.04104	0.454584	4.4899	7.13e-06	0.000230293
isogroup6067	Cholesterol 24-hydroxylase	3e-12	35.7948	1.31205	0.328538	3.99361	6.51e-05	0.00145395
isogroup6096	Eukaryotic translation initiation factor 3 subunit M	2e-156	167.264	-0.567559	0.145731	-3.89457	9.84e-05	0.0020389
isogroup6129	Alcohol dehydrogenase Class vi (Fragment)	1e-99	63.9487	-0.875973	0.250566	-3.49598	0.000472318	0.00731416
isogroup614	17 beta hydroxy steroid dehydrogenase 3	6e-173	47.3757	-1.27444	0.272277	-4.68066	2.86e-06	0.000106584
isogroup6161	NVL (Fragment)	4e-115	31.7161	-1.17723	0.324389	-3.62906	0.000284455	0.00486893
isogroup6186	Type II antifreeze protein (Fragment)	2e-61	210.411	-1.91931	0.533222	-3.59946	0.000318878	0.00535894
isogroup61956	Potassium voltage-gated channel subfamily G member 2	2e-35	486.752	1.21529	0.281567	4.31618	1.59e-05	0.000448688
isogroup621	Phytanoyl-CoA dioxygenase peroxisomal	3e-170	506.073	-2.21168	0.248075	-8.91537	4.86e-19	1.36e-16
isogroup6212	General transcription factor IIH subunit 4	5e-151	1.2678	3.57941	0.813117	4.40209	1.07e-05	0.000324156
isogroup6223	Chymotrypsin elastase family member 3A	2e-162	2.96206	3.21912	0.562444	5.72344	1.04e-08	7.32e-07
isogroup6248	Elongation factor 1-beta	1e-118	1686.89	-0.653457	0.174006	-3.75536	0.000173092	0.00324428
isogroup6276	Protein C8orf4 homolog	4e-22	337.81	1.40318	0.390276	3.59536	0.000323946	0.00542476
isogroup6291	Cullin-5 (Fragment)	1e-44	58.9231	1.78248	0.395222	4.51007	6.48e-06	0.000213546
isogroup63	Reverse transcriptase	9e-95	31.2564	2.54665	0.429096	5.93492	2.94e-09	2.28e-07
isogroup632	Copper chaperone Atox1	4e-26	175.439	-0.825811	0.178101	-4.63675	3.54e-06	0.000128632
isogroup6325	Complement factor H	3e-42	79.7706	-1.1946	0.337241	-3.54226	0.000396712	0.00633543
isogroup6348	Pleckstrin domain-containing family M member 3	2e-25	8.52497	4.07675	0.486784	8.37485	5.53e-17	1.24e-14
isogroup638	Pyridoxine-5-phosphate oxidase	3e-174	4.90618	-1.72335	0.484878	-3.55419	0.000379145	0.00611982
isogroup6426	Trans-aconitate 3-methyltransferase	3e-111	84.3649	-3.6683	0.596956	-6.14501	8e-10	6.91e-08
isogroup6457	Chromosome 8 SCAF7842 whole genome shotgun sequence (Fragment)	5e-146	34.9844	2.75424	0.598276	4.60362	4.15e-06	0.000146615
isogroup6466	Reverse transcriptase	2e-25	3.18115	-3.25974	0.626073	-5.20665	1.92e-07	1.01e-05
isogroup654	Voltage-dependent anion channel 3	8e-176	119.794	0.745749	0.194671	3.83083	0.000127714	0.00251923
isogroup6561	Inactive serine protease PAMR1	1e-68	2.87767	2.14017	0.595948	3.5912	0.000329154	0.00549588
isogroup6577	UPF0420 protein	4e-68	8.18241	-1.90001	0.429166	-4.42721	9.55e-06	0.000293901
isogroup65812	ITGAL	6e-21	1.02633	3.01109	0.785457	3.83355	0.000126308	0.00249665
isogroup659	Solute carrier family 22 member 5	7e-148	23.1308	6.56005	0.572077	11.4671	1.93e-30	1.49e-27
isogroup661	Coatomer subunit zeta-1	6e-109	30.8961	-1.30572	0.320105	-4.07904	4.52e-05	0.00107695
isogroup6663	Nudix (Nucleoside diphosphate linked moiety X)-type motif 16	4e-28	19.9868	2.78426	0.494478	5.6307	1.79e-08	1.2e-06
isogroup66903	Patatin phospholipase	6e-24	1.32967	2.82324	0.728632	3.87471	0.000106751	0.00218091
isogroup66963	CD45 protein (Fragment)	4e-44	3.9122	1.65508	0.48335	3.42418	0.000616653	0.00894837
isogroup673	Tripartite motif-containing protein 47	8e-159	24.2972	1.15102	0.28339	4.06161	4.87e-05	0.0011435
isogroup675	Tributyltin-binding protein type	2e-89	464.549	1.42343	0.405336	3.51172	0.00044521	0.00697365
isogroup67517	Exostosin-1b	3e-32	1.9987	-3.40539	0.745723	-4.56656	4.96e-06	0.000170234
isogroup6778	Cytochrome P450 CYP2N	5e-41	7.75	-2.98979	0.544344	-5.49246	3.96e-08	2.48e-06
isogroup6788	Delta(35)-Delta(24)-dienoyl-CoA isomerase mitochondrial	3e-78	69.887	0.932051	0.210522	4.42733	9.54e-06	0.000293901
isogroup68	Inositol oxygenase	4e-177	1077.81	1.34546	0.21023	6.39994	1.55e-10	1.54e-08
isogroup68093	Type II antifreeze protein (Fragment)	3e-06	19.4329	4.5955	0.803243	5.72119	1.06e-08	7.4e-07
isogroup682	Store-operated calcium entry-associated regulatory factor	9e-72	12.0421	-1.20471	0.287655	-4.18803	2.81e-05	0.000729104
isogroup6824	ATP-binding cassette sub-family G member 4	3e-09	2.47713	-2.19281	0.592525	-3.70079	0.000214932	0.00388589
isogroup6879	Selenoprotein M	3e-49	3.59137	2.84501	0.450704	6.31238	2.75e-10	2.56e-08
isogroup69	Complement factor B	4e-159	858.991	0.491274	0.143721	3.41825	0.000630251	0.00908591
isogroup69264	Nuclear receptor coactivator 2	4e-11	3.67789	-1.92292	0.520005	-3.69789	0.000217397	0.0039156
isogroup694	Transcription factor BTF3 (Fragment)	7e-104	740.252	-0.536844	0.142344	-3.77146	0.000162294	0.00307007
isogroup6980	Transcription initiation factor TFIID subunit 3	1e-60	27.5488	-0.959951	0.218851	-4.38632	1.15e-05	0.000341688
isogroup701	Apolipoprotein B-100	9e-157	68.05	-1.88146	0.283006	-6.64813	2.97e-11	3.3e-09
isogroup70302	Complement component pro-C3-2	8e-32	15.772	-1.89721	0.435221	-4.3592	1.31e-05	0.000379443
isogroup7069	Chymotrypsin elastase family member 1 (Fragment)	5e-104	126.627	2.37972	0.510878	4.65809	3.19e-06	0.000116882
isogroup708	Solute carrier family 38 member 5b	3e-180	200.013	1.24912	0.193997	6.43883	1.2e-10	1.21e-08
isogroup7145	Sodium-dependent multivitamin transporter	2e-38	48.7765	1.0666	0.231269	4.61194	3.99e-06	0.000142804
isogroup7173	Ig mu chain C region membrane-bound form	2e-89	55.6695	1.66287	0.461163	3.60582	0.000311168	0.00526318
isogroup7205	Kininogen	2e-90	2968.37	-1.40632	0.278971	-5.04111	4.63e-07	2.17e-05
isogroup72166	Collectrin	1e-11	16.9566	-3.71008	0.662257	-5.60217	2.12e-08	1.4e-06
isogroup7224	NLRC3 protein	1e-19	4.31482	1.70569	0.501486	3.40126	0.00067075	0.00954942
isogroup723	Integumentary mucin C.1 putative	1e-17	96.3509	-2.04323	0.203611	-10.0349	1.07e-23	5.02e-21
isogroup72395	Chromosome 5 SCAF14581 whole genome shotgun sequence	8e-08	14.7091	-2.89529	0.349625	-8.28115	1.22e-16	2.66e-14
isogroup724	Eukaryotic translation initiation factor 3 subunit Jb (Fragment)	2e-56	88.8284	0.742756	0.180468	4.11573	3.86e-05	0.000948879
isogroup72906	GNPAT	2e-30	1.33583	2.99478	0.781921	3.83003	0.000128126	0.00252388
isogroup73573	Si:dkey-174c13.2	1e-09	3.93081	-3.46219	0.654851	-5.287	1.24e-07	7.01e-06
isogroup7390	GTPase IMAP family member 4	3e-57	158.288	-2.08917	0.410158	-5.09358	3.51e-07	1.72e-05
isogroup74190	Cytochrome c oxidase subunit 3	3e-31	3890.94	-1.29352	0.314444	-4.11367	3.89e-05	0.000955245
isogroup743	Complement factor B	3e-117	15.5839	-2.19176	0.497995	-4.40117	1.08e-05	0.000325164
isogroup74830	Apolipoprotein AIV	1e-30	10.3601	2.02183	0.585619	3.45246	0.000555497	0.00823656
isogroup749	Glutaminyl-peptide cyclotransferase	2e-129	28.5467	1.38143	0.31557	4.37757	1.2e-05	0.000354238
isogroup750	Complement C3 (Fragment)	5e-147	768.71	-1.22021	0.213825	-5.70661	1.15e-08	8.02e-07
isogroup7516	PPUP3535	3e-65	67.3145	2.12167	0.476514	4.45249	8.49e-06	0.000268366
isogroup75172	Myosin 1 beta (Fragment)	6e-42	3.28297	-1.96186	0.577099	-3.39953	0.000675026	0.00959597
isogroup75211	NAD-dependent protein deacylase sirtuin-5 mitochondrial	3e-38	1.48659	3.08736	0.843502	3.66017	0.000252052	0.004418
isogroup7683	Furin (Paired basic amino acid cleaving enzyme) a (Fragment)	7e-35	1.64342	2.4237	0.657402	3.68678	0.000227105	0.00405857
isogroup7754	Serologically defined colon cancer antigen 3 homolog	4e-06	9.76786	1.5236	0.374317	4.07034	4.69e-05	0.00110966
isogroup7757	Low-density lipoprotein receptor	2e-17	19.1342	1.66462	0.437942	3.80099	0.000144118	0.00279083
isogroup7766	Fgfr1op N-terminal like	6e-72	2.9999	-2.61745	0.624149	-4.19363	2.75e-05	0.000714466
isogroup7771	Trophoblast glycoprotein (Fragment)	2e-37	2.98412	-2.76297	0.620708	-4.45131	8.53e-06	0.000268421
isogroup7801	NADH-ubiquinone oxidoreductase chain 1	2e-124	804.005	2.06531	0.2901	7.11928	1.08e-12	1.51e-10
isogroup7824	Complement component c3	1e-114	28.0895	1.24356	0.361935	3.43586	0.000590677	0.00865499
isogroup7832	Histone deacetylase	1e-07	6.34574	2.59486	0.398997	6.50345	7.85e-11	8.11e-09
isogroup7835	Ceroid-lipofuscinosis neuronal protein 5	6e-109	2.46503	-2.26894	0.649059	-3.49574	0.000472756	0.00731697
isogroup78621	Tetratricopeptide repeat protein 38	2e-27	2.92964	2.28639	0.569252	4.01649	5.91e-05	0.00134736
isogroup78766	Chromosome 2 SCAF15004 whole genome shotgun sequence	1e-07	2.62761	2.4778	0.593144	4.1774	2.95e-05	0.000759098
isogroup7885	Diamine acetyltransferase 1 (Fragment)	3e-17	67.6902	2.14784	0.467293	4.59635	4.3e-06	0.000151451
isogroup7929	PPUP4374 (Fragment)	1e-09	54.2378	-0.877055	0.250156	-3.50603	0.000454842	0.00709345
isogroup793	Cytochrome P450 2F5	6e-117	12.2079	2.52756	0.705905	3.58059	0.000342823	0.00567029
isogroup7966	ATP-binding cassette sub-family C (CFTR/MRP) member 4 (Fragment)	6e-22	2.37606	2.63907	0.751126	3.51349	0.000442268	0.00693898
isogroup7996	Histone deacetylase complex subunit SAP18	1e-92	13.2833	1.4378	0.327539	4.38971	1.14e-05	0.00033817
isogroup8010	SHLB2	2e-106	2.61038	3.21348	0.638133	5.03575	4.76e-07	2.22e-05
isogroup8021	Chromosome 16 SCAF15113 whole genome shotgun sequence	2e-35	9.52539	2.26173	0.513248	4.40671	1.05e-05	0.000319363
isogroup80337	Sulfotransferase	7e-15	2.01556	2.63311	0.721654	3.64872	0.000263551	0.00456906
isogroup8071	Chromosome 8 SCAF14543 whole genome shotgun sequence	2e-36	4.98477	-1.88689	0.4591	-4.10998	3.96e-05	0.000967325
isogroup80829	Alpha-amylase (Fragment)	3e-38	4.09694	-3.52768	0.584933	-6.03092	1.63e-09	1.32e-07
isogroup8123	Androgen receptor (Fragment)	4e-133	6.65263	2.58377	0.510506	5.0612	4.17e-07	2e-05
isogroup8136	PPUP9740 (Fragment)	3e-31	3.34498	2.01369	0.580567	3.46849	0.00052339	0.0078748
isogroup817	MIA3 (Fragment)	2e-94	20.8634	1.20852	0.323345	3.73754	0.000185827	0.00343349
isogroup819	Transcobalamin-2	2e-47	330.389	-1.13442	0.184625	-6.14445	8.02e-10	6.91e-08
isogroup8193	Transposase	2e-15	66.0428	-1.63173	0.318378	-5.12513	2.97e-07	1.48e-05
isogroup8199	PPUP3526 (Fragment)	1e-22	111.251	1.9282	0.455551	4.23267	2.31e-05	0.000619619
isogroup822	Cytochrome P450 2F2	3e-120	2.64941	3.11464	0.66078	4.71358	2.43e-06	9.25e-05
isogroup8233	Alpha-2-macroglobulin	5e-34	221.047	1.42385	0.371145	3.83638	0.000124861	0.00247661
isogroup8242	Ubiquitously-expressed transcript	2e-81	6.94451	1.64236	0.434247	3.7821	0.000155514	0.00297128
isogroup8363	Sulfurtransferase	3e-40	35.1748	-0.829252	0.215484	-3.84833	0.000118928	0.00238824
isogroup8372	Pterin-4-alpha-carbinolamine dehydratase 2	4e-64	57.9596	-1.3571	0.227264	-5.97147	2.35e-09	1.85e-07
isogroup8387	Proteasome maturation protein	7e-80	58.4821	-0.970621	0.272319	-3.56428	0.00036486	0.00593769
isogroup8390	Family with sequence similarity 98 member A (Fragment)	7e-113	2.69332	2.31588	0.654699	3.53732	0.000404209	0.00644077
isogroup844	Feline leukemia virus subgroup C cellular receptor family member 2b (Fragment)	1e-116	15.4213	-1.19749	0.288595	-4.14939	3.33e-05	0.000840079
isogroup8446	GTPase IMAP family member 2	1e-28	5.12752	2.59555	0.475068	5.46354	4.67e-08	2.88e-06
isogroup847	Jun dimerization protein 2	9e-131	1.40962	3.05866	0.682135	4.48395	7.33e-06	0.000236282
isogroup848	Cytochrome P450 2J2	3e-179	20.5209	4.95988	0.453992	10.925	8.75e-28	5.56e-25
isogroup852	Steryl-sulfatase	2e-137	34.7579	-1.11249	0.30117	-3.6939	0.000220838	0.00396511
isogroup8539	Receptor-interacting serine/threonine-protein kinase 4	1e-97	3.34978	2.25377	0.534236	4.21868	2.46e-05	0.000648987
isogroup8552	Receptor protein-tyrosine kinase	3e-26	3.01867	-2.74596	0.699291	-3.92677	8.61e-05	0.00181999
isogroup856	Reverse transcriptase protein	1e-104	37.7107	5.57343	0.427853	13.0265	8.65e-39	1.24e-35
isogroup859	Cathepsin Z	3e-158	204.019	0.590169	0.143278	4.11905	3.8e-05	0.000939667
isogroup8613	CTD small phosphatase protein 2-A	4e-149	2.15138	2.05461	0.515168	3.98823	6.66e-05	0.00147707
isogroup8655	Molybdenum cofactor biosynthesis protein 1	2e-15	6.41782	1.50734	0.409201	3.6836	0.00022996	0.00409547
isogroup8703	E3 ubiquitin-protein ligase RNF19A	2e-81	6.72626	1.61017	0.446748	3.60421	0.000313101	0.00529274
isogroup8759	Nicotinamide phosphoribosyltransferase	5e-71	5.39592	2.42601	0.499824	4.85374	1.21e-06	5.07e-05
isogroup878	Cytochrome c oxidase subunit 8B	2e-24	600.079	-0.676362	0.146828	-4.60649	4.1e-06	0.000145685
isogroup88	Cyclin-G1	2e-123	1362.13	-0.781834	0.128226	-6.09729	1.08e-09	9.05e-08
isogroup8868	Serine dehydratase protein	4e-27	14.0647	1.01376	0.238185	4.25617	2.08e-05	0.000566486
isogroup890	TEN3 (Fragment)	3e-126	6.32278	2.01357	0.492418	4.08914	4.33e-05	0.00103805
isogroup8903	Sodium-coupled neutral amino acid transporter 3	7e-08	13.5523	1.293	0.36799	3.51367	0.000441963	0.006938
isogroup897	Glycerate kinase (Fragment)	2e-90	83.462	-1.34611	0.212778	-6.32635	2.51e-10	2.38e-08
isogroup9	Very long-chain acyl-CoA synthetase	3e-140	599.754	-1.96963	0.265733	-7.41207	1.24e-13	1.96e-11
isogroup9002	UDP-glucuronosyltransferase	3e-32	16.9312	2.72868	0.427034	6.38985	1.66e-10	1.63e-08
isogroup902	Monocarboxylate transporter 7	9e-174	47.431	0.955823	0.244399	3.91091	9.19e-05	0.00192105
isogroup9029	Pentaxin	5e-101	34.5529	-3.35158	0.700802	-4.78249	1.73e-06	6.93e-05
isogroup909	Constitutive coactivator of PPAR-gamma protein 1	2e-52	14.0832	1.11469	0.238941	4.66512	3.08e-06	0.000113832
isogroup9104	Bile acid-CoA:amino acid N-acyltransferase	1e-12	20.9574	-1.71077	0.355464	-4.81277	1.49e-06	6.07e-05
isogroup9111	Cytochrome P450 2D15	5e-10	5.54868	4.42422	0.627768	7.04754	1.82e-12	2.46e-10
isogroup9125	Isocitrate dehydrogenase [NADP]	2e-58	14.4111	-2.27983	0.454221	-5.0192	5.19e-07	2.39e-05
isogroup9166	UPF0598 protein	3e-37	26.3912	-1.17833	0.275666	-4.27448	1.92e-05	0.000528917
isogroup927	Pyroglutamyl-peptidase 1	2e-132	20.9274	-0.851852	0.240615	-3.54031	0.000399653	0.00637173
isogroup929	Complement factor H	2e-154	2054.09	-2.95795	0.220827	-13.3949	6.48e-41	1.24e-37
isogroup93	UDP-glucuronosyltransferase 2A1	4e-128	162.892	1.83696	0.302074	6.08115	1.19e-09	9.86e-08
isogroup935	Ferritin	2e-116	2.76684	2.26499	0.621486	3.64447	0.000267939	0.00463336
isogroup940	Reticulon	3e-124	204.603	-0.990524	0.197062	-5.02645	5e-07	2.31e-05
isogroup9440	Seizure related 6 homolog like (Fragment)	4e-35	10.0257	-4.35892	0.608184	-7.16711	7.66e-13	1.1e-10
isogroup9461	10 kDa heat shock protein mitochondrial	9e-58	85.2516	-1.76943	0.340803	-5.19194	2.08e-07	1.08e-05
isogroup9499	PLD1 (Fragment)	7e-86	29.6201	6.8252	0.707005	9.65368	4.74e-22	1.78e-19
isogroup951	NADH-ubiquinone oxidoreductase chain 4	1e-170	219.85	1.64831	0.315565	5.22335	1.76e-07	9.38e-06
isogroup953	Growth hormone-inducible transmembrane protein	4e-161	69.3088	-0.559603	0.156719	-3.57075	0.000355958	0.00581113
isogroup9536	LIN1 (Fragment)	2e-33	1.67133	3.88594	0.668834	5.81002	6.25e-09	4.58e-07
isogroup957	Cell death activator CIDE-B	3e-121	239.258	-0.894191	0.143638	-6.22532	4.81e-10	4.28e-08
isogroup962	Isoaspartyl peptidase/L-asparaginase	1e-108	111.516	1.09026	0.322127	3.38456	0.000712917	0.00999551
isogroup9717	SBCFR-1 protein (Fragment)	3e-43	1320	3.02446	0.362537	8.34249	7.27e-17	1.61e-14
isogroup9735	Sorting nexin-2	1e-06	59.9515	0.784944	0.225575	3.47974	0.000501896	0.00763171
isogroup9759	Tripartite motif-containing protein 35	3e-73	14.0808	3.86832	0.544987	7.098	1.27e-12	1.73e-10
isogroup9779	VPS41 (Fragment)	3e-143	5.30984	-1.92484	0.487127	-3.9514	7.77e-05	0.00167463
isogroup9790	RAB31 member RAS oncogene family	2e-119	29.6599	2.4509	0.414584	5.91171	3.39e-09	2.6e-07
isogroup981	Serine hydrolase 2 protein	2e-157	6.1818	-1.7107	0.472379	-3.62145	0.000292953	0.00498752
isogroup982	Redox-regulatory protein FAM213A	9e-113	78.8909	-0.950796	0.246663	-3.85463	0.000115903	0.00234114
isogroup9848	Galectin	9e-57	4.97692	-2.43369	0.567392	-4.28925	1.79e-05	0.000499281
isogroup9892	Eukaryotic translation initiation factor 3 subunit L	4e-119	243.316	-0.51547	0.130247	-3.95765	7.57e-05	0.00164144
isogroup9910	MDR1A	2e-58	24.018	2.36852	0.493417	4.80025	1.58e-06	6.43e-05

## Sheet: flav-mac
isogroup	Protein	e.value	baseMean	log2FoldChange	lfcSE	stat	pvalue	padj
isogroup10031	Si:ch211-262h13.3 protein	2e-16	3.74659	3.68517	0.691999	5.3254	1.01e-07	2.4e-06
isogroup1005	UDP-glucuronosyltransferase 1-1	7e-160	9.07251	1.71451	0.35453	4.83601	1.32e-06	2.42e-05
isogroup10057	Cytochrome c oxidase subunit VIIa-related protein mitochondrial	1e-34	2.67337	-4.99394	0.513216	-9.73068	2.23e-22	4.18e-20
isogroup1009	Bleomycin hydrolase (Fragment)	1e-160	8.72385	-1.34849	0.30846	-4.3717	1.23e-05	0.000173242
isogroup1010	Calpastatin	4e-28	95.0684	1.32967	0.134126	9.91364	3.63e-23	7.61e-21
isogroup1014	Fetuin-B	2e-158	353.665	-1.51497	0.138907	-10.9063	1.07e-27	3.52e-25
isogroup10149	RPAC2	4e-66	5.95468	-1.44066	0.36302	-3.96854	7.23e-05	0.000805925
isogroup10168	Solute carrier family 35 member F5	3e-34	8.32761	3.33837	0.491156	6.79697	1.07e-11	5.44e-10
isogroup10214	1-acylglycerol-3-phosphate O-acyltransferase 3	1e-70	1.69839	-1.61689	0.498562	-3.2431	0.00118235	0.00839463
isogroup10215	Reverse transcriptase (Fragment)	2e-41	2.91775	-2.31334	0.514124	-4.49957	6.81e-06	0.000104078
isogroup10241	Complement factor H-related protein 2	4e-31	1.79988	-2.85766	0.614017	-4.65404	3.25e-06	5.36e-05
isogroup10246	Nuclear nucleic acid-binding protein C1D	9e-85	2.42231	-2.39462	0.540206	-4.43278	9.3e-06	0.000136181
isogroup10259	Transmembrane protein 120A	3e-54	8.88465	-2.47438	0.450861	-5.48812	4.06e-08	1.07e-06
isogroup1026	Glyceronephosphate O-acyltransferase	1e-68	55.9915	1.17159	0.322931	3.628	0.000285629	0.00252973
isogroup10306	RAPH1 (Fragment)	2e-06	13.4198	-1.17554	0.276577	-4.2503	2.13e-05	0.000281304
isogroup1033	Protein MAK16	1e-136	5.92516	-1.65619	0.492537	-3.36256	0.000772227	0.00590318
isogroup10335	Metabotropic glutamate receptor 1	3e-07	2.3661	1.77698	0.48995	3.62686	0.000286885	0.00253861
isogroup10347	Alpha-N-acetylgalactosaminidase	1e-81	7.89823	2.97423	0.380895	7.80853	5.79e-15	4.6e-13
isogroup1035	Aldose reductase	8e-88	110.186	-1.88209	0.135547	-13.8852	7.79e-44	8.1e-41
isogroup10356	Serine/threonine-protein kinase mTOR	9e-33	10.9597	1.72676	0.345267	5.00124	5.7e-07	1.13e-05
isogroup10369	Cytochrome b-c1 complex subunit 10	1e-25	107.133	-1.0131	0.26056	-3.88814	0.000101014	0.00106142
isogroup10372	Neural cell expressed developmentally down-regulated 4 E3 ubiquitin protein ligase (Fragment)	2e-66	8.17982	-1.27289	0.323399	-3.93598	8.29e-05	0.00090141
isogroup10437	Complement C1q protein 3	4e-33	2.5463	-1.67711	0.424076	-3.95473	7.66e-05	0.000842674
isogroup10457	Pleckstrin homology domain family B member 2 (Fragment)	3e-131	5.49067	2.14581	0.402383	5.33276	9.67e-08	2.31e-06
isogroup10466	p3 protein	2e-11	32.3028	-2.44621	0.234931	-10.4125	2.18e-25	5.56e-23
isogroup1051	Alpha-2-HS-glycoprotein	6e-144	5747.69	-1.61692	0.206777	-7.81962	5.3e-15	4.24e-13
isogroup10519	IQGA1 (Fragment)	1e-117	8.78492	1.03888	0.275903	3.7654	0.000166282	0.00160313
isogroup1053	RING finger protein 175	3e-148	8.61493	0.84912	0.244658	3.47064	0.000519227	0.00422399
isogroup10550	Argininosuccinate lyase putative	6e-72	8.60723	-1.7728	0.358711	-4.94213	7.73e-07	1.49e-05
isogroup10570	Sterile alpha motif domain containing 13	2e-16	1.57056	-2.69366	0.688264	-3.9137	9.09e-05	0.000974758
isogroup10610	CO3 (Fragment)	6e-46	11.6094	2.09016	0.428871	4.87363	1.1e-06	2.04e-05
isogroup1063	Glyoxylate reductase/hydroxypyruvate reductase	3e-178	5.34881	-1.20345	0.309135	-3.89297	9.9e-05	0.00104414
isogroup10680	Kynurenine 3-monooxygenase	2e-13	3.19062	1.66243	0.451117	3.68513	0.000228584	0.00209781
isogroup107	Secernin-2	8e-154	28.0402	0.930591	0.209659	4.4386	9.05e-06	0.000133055
isogroup10702	Mitochondrial enolase superfamily member 1	1e-50	11.9773	0.870284	0.2521	3.45213	0.000556171	0.00447692
isogroup10710	Homeodomain-interacting protein kinase 1	6e-21	4.51394	-1.18601	0.369937	-3.20599	0.00134599	0.00933341
isogroup10784	Aminopeptidase N	2e-71	2.08507	-2.95238	0.505697	-5.83824	5.28e-09	1.65e-07
isogroup1081	Solute carrier family 22 member 13	4e-180	7.9644	-1.2041	0.356063	-3.3817	0.000720386	0.00557758
isogroup10824	Solute carrier family 22 member 16	2e-129	6.39529	1.80508	0.439892	4.10347	4.07e-05	0.000489389
isogroup1084	Complement component C3	5e-179	51.1662	-1.71754	0.291934	-5.88331	4.02e-09	1.3e-07
isogroup1086	Cytolysin Src-1 (Fragment)	5e-54	6.48397	-0.936279	0.29266	-3.1992	0.00137808	0.00949917
isogroup10866	CTD small phosphatase protein 2-B	1e-31	7.85153	-2.2938	0.327019	-7.01428	2.31e-12	1.31e-10
isogroup1087	Alpha-kinase 1	2e-179	3.61775	-1.29182	0.379804	-3.40128	0.000670723	0.0052524
isogroup10875	Granzyme	2e-46	6.71886	4.47392	0.613243	7.29551	2.98e-13	1.87e-11
isogroup1088	Tetraspanin	1e-138	62.886	0.86437	0.175876	4.91466	8.89e-07	1.69e-05
isogroup10896	Melanocortin 2 receptor accessory protein (Fragment)	2e-22	23.8176	3.11627	0.391223	7.96545	1.65e-15	1.41e-13
isogroup10937	Hephaestin 1 (Fragment)	8e-20	5.56649	1.63778	0.395511	4.14091	3.46e-05	0.000424419
isogroup11	Chromosome 3 open reading frame 17	2e-138	53.1554	-2.31651	0.194247	-11.9256	8.7e-33	4.04e-30
isogroup1100	CYLD (Fragment)	3e-160	14.0376	1.0748	0.228685	4.69994	2.6e-06	4.4e-05
isogroup11016	ATP synthase subunit d	3e-83	30.7706	-0.497602	0.135713	-3.66656	0.000245834	0.00223504
isogroup11031	Tumor necrosis factor receptor superfamily member 5	1e-07	2.2751	3.29693	0.621775	5.30246	1.14e-07	2.68e-06
isogroup11061	Axin interactor dorsalization-associated protein (Fragment)	2e-58	2.18935	1.54259	0.46106	3.34574	0.000820647	0.00621503
isogroup11070	Pannexin 2	7e-106	6.66457	-1.10577	0.311809	-3.54632	0.000390653	0.00332701
isogroup11114	Methylmalonic aciduria and homocystinuria type D protein mitochondrial	1e-23	5.76202	-1.85412	0.399237	-4.64416	3.41e-06	5.61e-05
isogroup1112	Mx2 protein	9e-177	8.8842	3.66732	0.554989	6.60791	3.9e-11	1.84e-09
isogroup11122	Apoptosis-inducing factor 2	1e-119	1.94154	2.81164	0.625588	4.4944	6.98e-06	0.00010637
isogroup11133	Cleavage and polyadenylation specificity factor subunit 3	3e-126	2.78493	1.49542	0.432309	3.45914	0.000541903	0.0043801
isogroup1114	Dual specificity protein phosphatase 23	4e-91	14.9219	-1.12831	0.292338	-3.85962	0.000113563	0.00117125
isogroup1119	Eukaryotic elongation factor selenocysteine-tRNA-specific (Fragment)	1e-45	8.19381	-1.5486	0.308676	-5.01692	5.25e-07	1.05e-05
isogroup11231	Dolichol phosphate-mannose biosynthesis regulatory protein	1e-47	1.82131	-2.52162	0.520187	-4.84753	1.25e-06	2.3e-05
isogroup11314	Regulator of microtubule dynamics protein 1	2e-13	47.3221	-1.47143	0.195444	-7.52867	5.13e-14	3.64e-12
isogroup1132	Starch-binding domain-containing protein 1	6e-102	9.55293	1.72259	0.342517	5.02921	4.93e-07	9.9e-06
isogroup11321	Acidic mammalian chitinase	5e-16	10.8154	2.31864	0.291256	7.96081	1.71e-15	1.46e-13
isogroup1134	Phospholipase A2 group VII (Platelet-activating factor acetylhydrolase plasma)	1e-177	10.5137	-2.13447	0.332074	-6.4277	1.3e-10	5.64e-09
isogroup1136	Fibroblast growth factor 23 (Fragment)	7e-134	27.2468	-2.10711	0.337086	-6.25096	4.08e-10	1.62e-08
isogroup11376	CALM (Fragment)	4e-117	53.2055	0.679288	0.213306	3.18457	0.00144968	0.00990211
isogroup11387	Heat shock protein 70b	2e-88	15.1026	2.83624	0.715218	3.96556	7.32e-05	0.000813094
isogroup114	Cytochrome P450 3A40	1e-149	37.6578	-1.13483	0.187622	-6.04852	1.46e-09	5.19e-08
isogroup11421	Glycogenin-1 (Fragment)	4e-60	4.57259	1.61334	0.503626	3.20344	0.00135797	0.009397
isogroup1143	Protein tyrosine phosphatase receptor type f b (Fragment)	1e-111	15.8897	1.49255	0.2193	6.80597	1e-11	5.17e-10
isogroup1145	S-acyl fatty acid synthase thioesterase medium chain	7e-79	4.66813	-1.41553	0.368238	-3.84405	0.000121019	0.00123172
isogroup11469	Probable E3 ubiquitin-protein ligase HERC4	4e-26	9.04825	2.46398	0.618951	3.9809	6.87e-05	0.000769957
isogroup1147	Cytochrome P450 2J2	2e-78	48.8994	-3.07629	0.307322	-10.01	1.38e-23	2.97e-21
isogroup1149	Lambda-crystallin homolog	3e-124	5.51083	-2.24469	0.34567	-6.49372	8.37e-11	3.74e-09
isogroup1152	GRAM domain-containing protein 3	2e-179	1.82581	2.49919	0.629914	3.96751	7.26e-05	0.000807887
isogroup11578	Cytochrome c oxidase subunit	2e-52	143.48	0.973597	0.243069	4.00544	6.19e-05	0.000703134
isogroup1158	Arsenite methyltransferase	3e-115	21.1318	1.02036	0.289399	3.52577	0.000422251	0.00355594
isogroup1159	DUS19 (Fragment)	1e-107	5.23181	-3.21847	0.385967	-8.33872	7.51e-17	7.92e-15
isogroup11601	Leucine-rich repeat-containing G protein coupled receptor 8	2e-09	1.54452	-4.10372	0.594762	-6.89976	5.21e-12	2.82e-10
isogroup1161	Peptidylprolyl isomerase (Fragment)	3e-53	101.212	-1.08299	0.19448	-5.56867	2.57e-08	6.98e-07
isogroup1162	Membrane-spanning 4-domains subfamily A member 8A	7e-92	35.1785	2.4662	0.314407	7.84399	4.36e-15	3.54e-13
isogroup11636	Chromosome X open reading frame 57	2e-79	2.76762	1.96627	0.537846	3.65582	0.000256357	0.00231189
isogroup1179	Hibernation-specific plasma protein HP-55	3e-76	1025.33	-1.46005	0.17866	-8.1722	3.03e-16	2.95e-14
isogroup11791	Protein NLRC3	3e-32	1.12153	-2.08171	0.556063	-3.74367	0.000181353	0.00172744
isogroup11798	Interferon-induced very large GTPase 1	6e-53	3.42448	-2.26733	0.597322	-3.79583	0.000147152	0.00144691
isogroup1180	5-formyltetrahydrofolate cyclo-ligase	2e-103	28.6519	-0.850627	0.239947	-3.54506	0.000392518	0.003341
isogroup11846	Angiomotin like 2b (Fragment)	1e-81	14.7955	-1.10613	0.330474	-3.3471	0.000816605	0.00618598
isogroup1186	Reticulocalbin-3	4e-120	10.2466	-2.21768	0.28156	-7.8764	3.37e-15	2.8e-13
isogroup11881	Tryptophan hydroxylase	1e-21	3.86601	-3.9902	0.448832	-8.89019	6.1e-19	8.07e-17
isogroup11907	NRSF/REST	7e-29	9.42784	-0.980639	0.262283	-3.73886	0.000184855	0.0017547
isogroup11920	PPUP4125 (Fragment)	1e-79	26.6455	2.43045	0.390124	6.22993	4.67e-10	1.84e-08
isogroup11931	Protein PAT1 homolog 1	2e-46	1.94376	2.28482	0.582242	3.92418	8.7e-05	0.000937986
isogroup11949	Rhomboid domain containing 3 (Fragment)	2e-22	2.07147	1.75275	0.501995	3.49158	0.000480175	0.00395971
isogroup11966	Nuclear receptor-interacting protein 1	7e-91	6.12678	1.16167	0.329232	3.52842	0.000418052	0.0035255
isogroup11995	Par-6 partitioning defective 6 homolog gamma B (Fragment)	4e-11	9.15119	2.99239	0.342175	8.74519	2.23e-18	2.67e-16
isogroup120	Peroxisomal acyl-coenzyme A oxidase 3	2e-137	27.7851	-4.27998	0.327877	-13.0536	6.06e-39	4.57e-36
isogroup12043	Ras-related protein Rab-20 (Fragment)	1e-62	1.62009	-2.8514	0.59063	-4.82773	1.38e-06	2.51e-05
isogroup1209	Purinergic receptor P2X ligand-gated ion channel7	1e-14	6.19232	-1.26638	0.319741	-3.96066	7.47e-05	0.000826263
isogroup12090	Chromosome 1 open reading frame 21	3e-68	12.0656	1.45622	0.289307	5.03347	4.82e-07	9.69e-06
isogroup1215	Serine/threonine-protein kinase Nek6	8e-173	42.3234	-0.682472	0.209387	-3.25939	0.00111654	0.00799889
isogroup12177	IMB1 (Fragment)	5e-13	3.14104	1.83085	0.49374	3.70813	0.000208796	0.00194402
isogroup12179	tRNA aspartic acid methyltransferase 1	8e-92	1.14869	2.84493	0.652439	4.36045	1.3e-05	0.00018096
isogroup12192	Small nuclear ribonucleoprotein G (Fragment)	2e-48	60.7221	-0.708278	0.180885	-3.91562	9.02e-05	0.000967715
isogroup12248	Multidrug resistance-associated protein 4	2e-26	3.95899	-2.18005	0.421574	-5.17122	2.33e-07	5.08e-06
isogroup12256	Cytochrome P450 2N14	7e-120	24.4146	-6.61818	0.594463	-11.133	8.66e-29	3.11e-26
isogroup12269	Transmembrane protein 229B	3e-09	1.51173	-2.52095	0.648482	-3.88747	0.000101294	0.00106362
isogroup1227	Antithrombin-III	2e-168	386.276	-0.520583	0.157067	-3.31441	0.000918369	0.00681748
isogroup12290	Glycoprotein endo-alpha-12-mannosidase	1e-31	15.6195	1.27694	0.23087	5.53098	3.18e-08	8.48e-07
isogroup12308	THOP1 (Fragment)	4e-102	54.1767	-0.626715	0.162076	-3.86679	0.000110276	0.00114164
isogroup12311	Chromosome 1 SCAF14573 whole genome shotgun sequence (Fragment)	2e-30	3.52121	1.76102	0.432263	4.07396	4.62e-05	0.000546614
isogroup1233	Aldo-keto reductase family 1 member B10	3e-177	135.824	2.44981	0.230741	10.6171	2.48e-26	7.12e-24
isogroup12368	Xanthine dehydrogenase/oxidase	6e-45	75.6462	-0.687201	0.178358	-3.85293	0.000116712	0.0011988
isogroup12398	RET2	3e-88	174.949	1.34906	0.248472	5.42942	5.65e-08	1.43e-06
isogroup12400	Phosphate transporter (Fragment)	1e-20	6.61262	-1.78166	0.475206	-3.74923	0.000177375	0.00169455
isogroup12409	C-C motif chemokine	1e-16	9.26467	0.963497	0.274616	3.50852	0.000450612	0.00374732
isogroup1242	NED4L	4e-93	42.2404	-1.78164	0.188787	-9.43729	3.83e-21	6.17e-19
isogroup12443	RL14 (Fragment)	1e-91	1319.74	-0.713584	0.149263	-4.78072	1.75e-06	3.09e-05
isogroup12478	Protein tyrosine phosphatase mitochondrial 1	1e-30	2.79941	-1.52725	0.427355	-3.57372	0.000351947	0.00303421
isogroup12480	Chromosome 13 SCAF14627 whole genome shotgun sequence	2e-11	26.2854	-2.44792	0.457988	-5.34496	9.04e-08	2.17e-06
isogroup1250	Nicotinamide riboside kinase 1	1e-73	20.7557	-0.819099	0.22089	-3.70818	0.000208758	0.00194402
isogroup12503	Hepcidin	9e-19	239.272	-2.02086	0.601153	-3.36163	0.000774835	0.00592162
isogroup12528	Glycogenin 2	1e-24	8.08005	-1.0795	0.268801	-4.016	5.92e-05	0.000676705
isogroup12536	Upf0249 protein ydjc homolog	1e-30	2.95219	-3.40862	0.656901	-5.18895	2.11e-07	4.65e-06
isogroup12554	Spindle assembly abnormal protein 6	2e-15	1.81086	-3.34774	0.75486	-4.43491	9.21e-06	0.000134974
isogroup12556	Thioredoxin-related transmembrane protein 2-B	2e-15	7.37578	-1.64308	0.322199	-5.09959	3.4e-07	7.08e-06
isogroup126	Eukaryotic translation initiation factor 4E-binding protein 2	1e-70	81.7303	0.924199	0.149752	6.17154	6.76e-10	2.57e-08
isogroup1261	Calmin	3e-148	3.28143	-2.31762	0.517538	-4.47816	7.53e-06	0.000113808
isogroup12645	Deoxynucleoside triphosphate triphosphohydrolase SAMHD1	6e-14	0.889344	-2.50879	0.740604	-3.38749	0.000705359	0.00548068
isogroup12668	Lysophosphatidylcholine acyltransferase 2 (Fragment)	3e-41	20.8577	2.29215	0.288164	7.95433	1.8e-15	1.53e-13
isogroup12683	Surfactant protein B	3e-13	7.98218	1.63792	0.417292	3.92511	8.67e-05	0.000935009
isogroup12695	Tripartite motif-containing protein 39	4e-40	80.7869	1.82601	0.226011	8.07929	6.51e-16	6.04e-14
isogroup127	Tropomyosin alpha-3 chain	3e-88	57.0496	0.861227	0.184895	4.65791	3.19e-06	5.28e-05
isogroup12708	Hepatitis B virus X-interacting protein homolog	5e-54	4.00955	1.29147	0.400877	3.22161	0.00127471	0.00891295
isogroup12720	CD48 antigen	1e-29	2.36818	-1.6326	0.507602	-3.21631	0.00129851	0.00905411
isogroup12773	Eukaryotic translation initiation factor 3 subunit M	2e-97	1.23288	-1.99761	0.597448	-3.34358	0.000827046	0.00625052
isogroup12785	General transcription factor IIIAa	9e-10	1.86529	-3.25933	0.671393	-4.85458	1.21e-06	2.23e-05
isogroup12833	Anoctamin (Fragment)	4e-08	17.5666	1.15832	0.223444	5.18393	2.17e-07	4.76e-06
isogroup12847	eIF3a	1e-08	2.2091	2.68097	0.564815	4.74663	2.07e-06	3.61e-05
isogroup1286	Tripartite motif-containing protein 39	4e-116	5.15995	-3.61168	0.477574	-7.56255	3.95e-14	2.85e-12
isogroup1288	Methionine aminopeptidase 1	3e-33	2.97213	-1.20494	0.37625	-3.20251	0.00136236	0.00942094
isogroup129	Fatty acyl-CoA hydrolase precursor medium chain	2e-136	6.02579	2.47097	0.465588	5.30719	1.11e-07	2.62e-06
isogroup1290	Organic solute transporter subunit beta	2e-64	350.273	0.748348	0.147658	5.0681	4.02e-07	8.27e-06
isogroup12969	PPUP3387 (Fragment)	4e-24	24.5619	-2.65448	0.417808	-6.35335	2.11e-10	8.8e-09
isogroup13	Insulin growth factor binding protein 4	4e-82	252.346	-1.47066	0.303258	-4.84955	1.24e-06	2.28e-05
isogroup13001	Mitogen-activated protein kinase kinase kinase kinase 3	3e-50	3.48035	-1.76846	0.39774	-4.44626	8.74e-06	0.000129167
isogroup13068	PO21 (Fragment)	2e-16	16.1641	-1.15104	0.291088	-3.95425	7.68e-05	0.000843758
isogroup1308	Ependymin	6e-109	8.78334	1.35328	0.290708	4.65512	3.24e-06	5.33e-05
isogroup13090	Hepcidin	2e-45	202.671	3.49147	0.30323	11.5143	1.12e-30	4.32e-28
isogroup1312	Chloride intracellular channel protein (Fragment)	2e-173	6.41886	-1.31316	0.346764	-3.78689	0.000152545	0.00149022
isogroup1315	Phosphatidate phosphatase LPIN1	7e-175	45.617	-1.20409	0.308917	-3.89778	9.71e-05	0.00102796
isogroup1319	MA7D1	1e-52	35.7913	-1.71386	0.254816	-6.72586	1.75e-11	8.55e-10
isogroup1326	RBM5	5e-180	54.1669	1.07303	0.150801	7.11555	1.11e-12	6.6e-11
isogroup13266	Leukocyte immune-type receptor TS32.17 L1.2b (Fragment)	7e-24	306.629	-0.735807	0.211621	-3.47701	0.000507044	0.00414389
isogroup1332	LYPA2 (Fragment)	6e-135	0.962768	-2.94061	0.585705	-5.02064	5.15e-07	1.03e-05
isogroup1333	Lymphocyte antigen 6D (Fragment)	3e-17	251.662	3.1516	0.333906	9.43859	3.78e-21	6.13e-19
isogroup13384	SUMO-1 (Fragment)	2e-27	69.0872	-2.47026	0.306174	-8.06818	7.14e-16	6.54e-14
isogroup134	Receptor protein-tyrosine kinase	4e-08	256.602	-0.8053	0.167568	-4.80581	1.54e-06	2.77e-05
isogroup13413	Transmembrane protein 87A (Fragment)	1e-53	4.42734	2.06823	0.437921	4.72284	2.33e-06	4e-05
isogroup1342	Lysoplasmalogenase	6e-110	22.1871	-1.4941	0.195712	-7.6342	2.27e-14	1.67e-12
isogroup1343	Cell division control protein 42 homolog	9e-07	3.76506	-1.29432	0.388671	-3.33012	0.000868072	0.00649912
isogroup13507	Vitellogenin C	6e-71	227.58	6.11339	0.840101	7.27697	3.41e-13	2.13e-11
isogroup13510	Zgc:110265	2e-83	6.33621	-1.39095	0.328401	-4.23552	2.28e-05	0.000297421
isogroup1353	NAD(P)H-hydrate epimerase	7e-177	16.3219	-1.86393	0.188631	-9.88134	5.02e-23	1.03e-20
isogroup13538	Chromosome 2 SCAF8387 whole genome shotgun sequence	4e-12	6.15731	-2.75054	0.538396	-5.10876	3.24e-07	6.79e-06
isogroup1355	Symplekin	7e-170	9.97492	-0.841883	0.239125	-3.52068	0.000430449	0.00360986
isogroup13551	NADH-ubiquinone oxidoreductase chain 2	1e-70	17.9038	-1.36416	0.299831	-4.54978	5.37e-06	8.43e-05
isogroup13552	NADH-ubiquinone oxidoreductase chain 2	5e-31	53.3782	-1.60254	0.228116	-7.02512	2.14e-12	1.23e-10
isogroup13569	NADH dehydrogenase 1 subunit c2 (Fragment)	2e-67	33.6669	-1.02622	0.172481	-5.94975	2.69e-09	8.99e-08
isogroup13602	Double-stranded RNA-dependent protein kinase	2e-40	3.23322	2.14887	0.562534	3.81999	0.000133458	0.00133312
isogroup1362	AGTR2	5e-51	38.8138	-0.602705	0.156173	-3.85922	0.000113751	0.00117278
isogroup13646	Round spermatid basic protein 1 (Fragment)	4e-09	15.9875	0.78603	0.24168	3.25236	0.00114452	0.00817126
isogroup1365	Mitochondrial import inner membrane translocase subunit TIM17	6e-82	31.247	-1.16009	0.229511	-5.05461	4.31e-07	8.82e-06
isogroup13666	G-protein coupled receptor 4	1e-51	0.982289	2.61044	0.696607	3.74736	0.000178704	0.00170382
isogroup1367	Transmembrane protein 11 mitochondrial	3e-19	55.2044	0.758443	0.230281	3.29355	0.000989302	0.00723372
isogroup13726	LIM domain-containing protein ajuba	2e-128	0.557731	-2.54951	0.705953	-3.61145	0.00030449	0.00267244
isogroup1373	Vacuolar protein sorting-associated protein 33A	3e-100	10.0443	0.886889	0.273949	3.23742	0.00120614	0.00853639
isogroup1375	Soluble FGFR2 variant 3 (Fragment)	3e-39	5.95941	1.17144	0.306544	3.82144	0.000132673	0.0013266
isogroup13773	Virus induced TRIM protein (Fragment)	2e-07	6.43079	-3.10427	0.418058	-7.42545	1.12e-13	7.5e-12
isogroup1381	Annexin (Fragment)	3e-25	18.2095	-0.568359	0.169433	-3.35447	0.000795171	0.00604334
isogroup13813	Reverse transcriptase	5e-08	1.33733	-3.41916	0.594558	-5.75076	8.88e-09	2.68e-07
isogroup13817	ATP-binding cassette sub-family F member 3	6e-28	2.28445	-2.50297	0.683207	-3.66356	0.000248733	0.00225731
isogroup13858	Chromosome 4 SCAF14575 whole genome shotgun sequence	6e-17	253.308	-1.13474	0.340328	-3.33425	0.000855307	0.00642974
isogroup1389	Serine--pyruvate aminotransferase mitochondrial	5e-176	184.595	0.532461	0.162013	3.28654	0.00101426	0.00738463
isogroup13906	Nocturnin	4e-67	0.534146	-2.53371	0.788233	-3.21441	0.00130712	0.00909916
isogroup1391	C-1-tetrahydrofolate synthase cytoplasmic	2e-165	90.4839	-2.07898	0.276415	-7.52123	5.43e-14	3.83e-12
isogroup13913	Cation-transporting ATPase	1e-43	2.54883	-1.37856	0.373418	-3.69174	0.000222722	0.00205151
isogroup13937	Epidermal growth factor receptor a (Fragment)	7e-78	2.77939	1.57939	0.473046	3.33877	0.000841499	0.00633952
isogroup14	Choriogenin H (Fragment)	2e-177	8320.49	6.96301	0.726936	9.57858	9.84e-22	1.7e-19
isogroup1405	Leukocyte cell-derived chemotaxin-2	5e-31	9.6759	-2.16295	0.318878	-6.783	1.18e-11	5.97e-10
isogroup14057	GRB2-associated-binding protein 1	2e-38	2.99082	1.70554	0.443349	3.84694	0.000119601	0.00121893
isogroup14060	Ras association domain-containing protein 1 (Fragment)	4e-25	0.969466	-2.30277	0.676506	-3.40392	0.000664271	0.00520728
isogroup14079	Chitinase3	7e-12	628.987	-1.32039	0.192779	-6.84928	7.42e-12	3.9e-10
isogroup14084	Choline-phosphate cytidylyltransferase B	6e-20	13.9982	-2.12851	0.343527	-6.19603	5.79e-10	2.23e-08
isogroup1409	Phenazine biosynthesis domain-containing protein 1	7e-178	127.118	-0.480554	0.138993	-3.4574	0.000545405	0.00440251
isogroup14091	C-C motif chemokine 4	5e-29	22.0593	-1.24025	0.376737	-3.29208	0.00099451	0.00726278
isogroup141	Solute carrier family 25 member 40	5e-180	56.7202	-0.499262	0.147318	-3.38902	0.000701426	0.00545319
isogroup1412	S43A3	7e-24	7.38949	3.79855	0.810065	4.68919	2.74e-06	4.62e-05
isogroup142	CD82 antigen b	1e-63	7.51256	1.26557	0.300142	4.21656	2.48e-05	0.000319954
isogroup14233	ADP-ribosyl cyclase 1	8e-27	0.78473	-2.78221	0.65002	-4.28019	1.87e-05	0.000249394
isogroup1425	Membrane-spanning 4-domains subfamily A member 8A	4e-75	10.3693	1.09118	0.3098	3.5222	0.000427975	0.00359511
isogroup1432	Prohibitin-2	7e-165	21.0431	-1.11808	0.242049	-4.61924	3.85e-06	6.25e-05
isogroup1433	Malate dehydrogenase mitochondrial	1e-171	99.2658	-1.72359	0.161361	-10.6816	1.24e-26	3.71e-24
isogroup14339	Zinc finger protein 40	8e-37	2.96393	-1.8452	0.506689	-3.64169	0.000270852	0.00242233
isogroup14363	Coronin	3e-27	9.54407	-1.78887	0.288725	-6.19575	5.8e-10	2.23e-08
isogroup1437	DsRNA-dependent protein kinase	2e-131	0.676707	2.28525	0.714	3.20063	0.00137125	0.00946507
isogroup14392	Claudin (Fragment)	2e-50	41.2676	-3.09728	0.395859	-7.8242	5.11e-15	4.11e-13
isogroup14458	Protein SERAC1	2e-41	22.252	-0.782113	0.176018	-4.44337	8.86e-06	0.000130664
isogroup14470	Reactive oxygen species modulator 1	3e-25	235.838	-0.487729	0.145907	-3.34273	0.00082958	0.00626695
isogroup1449	12-dihydroxy-3-keto-5-methylthiopentene dioxygenase	6e-115	17.5088	-0.885561	0.230025	-3.84985	0.000118189	0.00120901
isogroup14521	Phosphoinositide-3-kinase regulatory subunit 1 (Alpha)	2e-74	0.90983	-2.84254	0.76747	-3.70378	0.000212407	0.00197127
isogroup1453	Alpha-1-antitrypsin	4e-136	199.047	-0.852826	0.207735	-4.10535	4.04e-05	0.000486203
isogroup1454	Cholesteryl ester transfer protein (Fragment)	2e-57	9.1445	-2.87224	0.329615	-8.71392	2.94e-18	3.5e-16
isogroup14558	IHABP	9e-48	24.1931	-3.21636	0.412076	-7.80527	5.94e-15	4.71e-13
isogroup1456	A disintegrin and metalloproteinase with thrombospondin motifs 13	2e-76	140.047	-0.557297	0.158366	-3.51905	0.000433093	0.003628
isogroup1457	MRS2 magnesium homeostasis factor homolog	5e-179	8.91284	-1.44028	0.377959	-3.81067	0.00013859	0.00137845
isogroup14621	ZFP36 ring finger protein 1 (Fragment)	1e-43	4.98649	4.4131	0.616395	7.15954	8.09e-13	4.9e-11
isogroup14624	MICOS complex subunit MIC10	4e-39	10.4076	2.24424	0.46339	4.84308	1.28e-06	2.35e-05
isogroup14631	Catenin delta-1	2e-25	5.33337	-1.31554	0.368191	-3.57298	0.000352939	0.00304102
isogroup14655	Heat shock protein 4 (Fragment)	3e-24	6.52858	-1.76225	0.380942	-4.62604	3.73e-06	6.07e-05
isogroup14660	5-aminolevulinate synthase	2e-65	34.1516	-0.771455	0.228919	-3.36999	0.000751705	0.00577264
isogroup1467	Butyrophilin subfamily 2 member A2	3e-112	23.9063	-1.292	0.250972	-5.14799	2.63e-07	5.66e-06
isogroup14711	Fc of IgE high affinity I receptor for gamma polypeptide (Fragment)	8e-10	9.70533	1.02833	0.297191	3.46016	0.000539848	0.00436583
isogroup1473	Hepatocellular carcinoma-associated protein TD26	8e-64	13.6716	-3.22421	0.635071	-5.07692	3.84e-07	7.9e-06
isogroup14731	NFIX (Fragment)	5e-62	48.667	1.20639	0.235463	5.12347	3e-07	6.34e-06
isogroup1476	PPM1H (Fragment)	3e-103	41.5363	-1.05747	0.305116	-3.46581	0.00052864	0.00429015
isogroup14768	PPUP6722 (Fragment)	5e-11	6.49827	1.37115	0.405855	3.37843	0.000729006	0.00562842
isogroup1477	Hemopexin	3e-144	11496.4	-0.642192	0.19508	-3.29194	0.000995001	0.00726278
isogroup148	Membrane-associated progesterone receptor component 1	3e-90	174.167	0.493434	0.091062	5.41866	6e-08	1.51e-06
isogroup1484	Chromosome 11 SCAF14979 whole genome shotgun sequence	1e-117	63.371	-1.25673	0.128973	-9.74413	1.95e-22	3.68e-20
isogroup14877	Zinc finger protein 670	2e-44	0.898672	-2.95594	0.703299	-4.20297	2.63e-05	0.000336487
isogroup1488	Signal recognition particle 14 kDa protein	3e-55	8.505	-0.835862	0.2485	-3.36364	0.000769227	0.00588323
isogroup1489	Iron-sulfur cluster assembly enzyme ISCU mitochondrial	7e-109	38.9604	-0.769701	0.189789	-4.05557	5e-05	0.000585716
isogroup14893	Nuclear receptor subfamily 5 group A member 2 (Fragment)	4e-51	7.73672	-1.66476	0.38157	-4.36291	1.28e-05	0.000179318
isogroup1491	Phospholipase A1 member A	4e-98	83.3953	-2.10889	0.183082	-11.5188	1.06e-30	4.15e-28
isogroup14920	Arrestin red cell isoform 2	6e-54	2.15887	-2.36816	0.51249	-4.62088	3.82e-06	6.21e-05
isogroup1494	Cyclic AMP phosphoprotein	1e-63	7.21595	-1.84228	0.307218	-5.99665	2.01e-09	6.97e-08
isogroup1495	Syndecan	2e-76	2.17589	-2.28974	0.560803	-4.08296	4.45e-05	0.000528339
isogroup1507	Coagulation factor X	2e-134	911.827	-1.45431	0.130833	-11.1158	1.05e-28	3.68e-26
isogroup15113	Chromosome 2 SCAF15010 whole genome shotgun sequence (Fragment)	1e-49	5.15947	-1.78212	0.44006	-4.04971	5.13e-05	0.000598473
isogroup15159	C209E (Fragment)	1e-38	3.71019	2.84517	0.537823	5.29015	1.22e-07	2.85e-06
isogroup1517	3-oxo-5-beta-steroid 4-dehydrogenase	1e-79	203.929	1.15354	0.217133	5.31257	1.08e-07	2.55e-06
isogroup1521	Purine nucleoside phosphorylase	6e-138	1051.54	-2.11713	0.556637	-3.80344	0.000142701	0.00141471
isogroup15258	Cystinosin	6e-19	0.949346	-3.45558	0.684346	-5.04946	4.43e-07	8.98e-06
isogroup15268	Protein NLRC3	3e-84	2.07671	-1.57546	0.434735	-3.62396	0.000290126	0.00256203
isogroup1530	D-dopachrome tautomerase	7e-68	59.8827	-2.49575	0.218289	-11.4333	2.85e-30	1.09e-27
isogroup1533	SWI/SNF-related matrix-associated actin-dependent regulator of chromatin subfamily E member 1-related	5e-142	18.0412	0.994769	0.235419	4.22553	2.38e-05	0.000309735
isogroup15354	Solute carrier family 27 member 2	1e-76	1.03859	-2.45076	0.74553	-3.28727	0.00101163	0.00736721
isogroup1539	Lactose-binding lectin l-2	9e-14	33.7578	-6.03539	0.542763	-11.1197	1.01e-28	3.57e-26
isogroup15457	Neutral amino acid transporter 2	5e-81	2.18729	-3.18148	0.535447	-5.94171	2.82e-09	9.4e-08
isogroup1546	Yghl1	9e-47	24.3376	-2.668	0.353612	-7.54501	4.52e-14	3.24e-12
isogroup15521	COP9 signalosome complex subunit 5	4e-47	15.7215	0.845933	0.196424	4.30667	1.66e-05	0.000225233
isogroup1558	PTGES	6e-85	10.138	-1.27169	0.307692	-4.13298	3.58e-05	0.000437021
isogroup15586	Pleiotropic regulator 1	3e-59	1.18349	-3.75061	0.666939	-5.62361	1.87e-08	5.3e-07
isogroup1559	Mitochondrial fission factor protein B	2e-133	7.51009	2.1762	0.365373	5.9561	2.58e-09	8.69e-08
isogroup1564	Chromodomain-helicase-DNA-binding protein 1	4e-36	9.5051	-1.37434	0.39207	-3.50535	0.000456009	0.00378631
isogroup15647	Cutaneous T-cell lymphoma-associated antigen 5	6e-08	33.478	-1.15728	0.241738	-4.78734	1.69e-06	3.01e-05
isogroup1565	Glutathione peroxidase	8e-106	42.2617	-1.69621	0.177945	-9.53222	1.54e-21	2.58e-19
isogroup15650	Claudin	1e-65	7.95612	2.4706	0.382627	6.45693	1.07e-10	4.7e-09
isogroup157	Acyl-coenzyme A thioesterase 4	2e-51	243.988	4.57481	0.262294	17.4415	3.99e-68	1.09e-64
isogroup15709	PolyA-binding protein cytoplasmic 1b (Fragment)	1e-37	10.1215	-2.21368	0.269331	-8.2192	2.05e-16	2.03e-14
isogroup15710	Protein BTG1 (Fragment)	2e-29	15.9247	2.58219	0.518564	4.9795	6.37e-07	1.25e-05
isogroup15729	CGG triplet repeat-binding protein 1 (Fragment)	2e-11	3.41529	-2.55064	0.592476	-4.30505	1.67e-05	0.000226477
isogroup15738	DnaJ subfamily B member 9	9e-24	2.9565	2.01362	0.539299	3.73377	0.000188636	0.00178553
isogroup1575	Agrin (Fragment)	9e-34	184.352	-0.457067	0.14159	-3.2281	0.00124617	0.00875397
isogroup15757	Apolipoprotein L3	7e-60	25.3131	2.27418	0.352009	6.46055	1.04e-10	4.61e-09
isogroup1576	Inhibitor of growth protein	3e-180	9.03875	1.12511	0.288166	3.90439	9.45e-05	0.0010077
isogroup1580	Arginase	1e-180	87.4303	-1.57625	0.27512	-5.7293	1.01e-08	3.01e-07
isogroup1581	Cytochrome c oxidase subunit 4 isoform 2 mitochondrial	9e-76	607.662	0.473888	0.112636	4.20725	2.58e-05	0.0003313
isogroup15872	Complement component c3	6e-59	6.85139	-1.38322	0.399103	-3.46582	0.000528621	0.00429015
isogroup15908	Pentaxin	1e-51	94.6545	2.48539	0.502793	4.94317	7.69e-07	1.48e-05
isogroup15943	Importin subunit alpha	5e-63	5.19189	-1.80874	0.53034	-3.41053	0.000648375	0.00510523
isogroup15962	CCR4-NOT transcription complex subunit 7	4e-68	5.60108	1.35387	0.386269	3.505	0.000456612	0.00379008
isogroup15968	Chromosome 16 SCAF14974 whole genome shotgun sequence (Fragment)	2e-60	30.7134	-0.63998	0.192021	-3.33287	0.000859553	0.0064525
isogroup15992	Vitellogenin Ab	4e-97	115.036	4.74492	0.916579	5.17678	2.26e-07	4.94e-06
isogroup16	GLGB (Fragment)	1e-25	70.1603	-1.2021	0.162398	-7.40217	1.34e-13	8.84e-12
isogroup160	Chromosome 9 SCAF14710 whole genome shotgun sequence (Fragment)	9e-121	13.4731	-1.76268	0.28942	-6.09037	1.13e-09	4.12e-08
isogroup1603	Syntaxin-4 (Fragment)	9e-176	9.0346	-1.99021	0.336008	-5.9231	3.16e-09	1.05e-07
isogroup1608	Tribbles homolog 1	1e-30	14.286	-1.94179	0.438098	-4.43231	9.32e-06	0.000136346
isogroup16092	ADP/ATP translocase 3	2e-78	1.42752	-3.192	0.551447	-5.7884	7.11e-09	2.18e-07
isogroup16126	Msx2-interacting protein	3e-77	18.9728	-0.756358	0.233054	-3.24542	0.00117278	0.00834924
isogroup1618	Malate synthase A MSA domain-containing protein	2e-119	116.296	0.734369	0.151987	4.8318	1.35e-06	2.47e-05
isogroup16183	Complement component C3	6e-88	7.35574	3.44255	0.448062	7.6832	1.55e-14	1.16e-12
isogroup16191	Inactive serine protease PAMR1	4e-15	2.83796	-2.08353	0.473624	-4.39911	1.09e-05	0.000155649
isogroup16222	FAM32A	2e-45	49.5856	0.613479	0.138996	4.41366	1.02e-05	0.000146656
isogroup1627	GLRX3 (Fragment)	3e-178	9.23866	-0.930737	0.275386	-3.37976	0.000725491	0.00560559
isogroup16291	Stonustoxin subunit alpha	7e-14	2.47614	-1.87369	0.425997	-4.39836	1.09e-05	0.000156039
isogroup163	Leucine-rich repeat-containing protein 17	6e-106	123.222	-1.1236	0.211729	-5.30677	1.12e-07	2.63e-06
isogroup16372	Cand1 protein (Fragment)	2e-64	1.56958	-3.01087	0.617105	-4.87901	1.07e-06	1.99e-05
isogroup1639	NADH-cytochrome b5 reductase	2e-177	32.0706	-0.870639	0.212794	-4.09146	4.29e-05	0.000512176
isogroup1642	Retinoic acid receptor responder 3	4e-82	74.9611	-0.953403	0.238077	-4.0046	6.21e-05	0.000705193
isogroup16517	Zinc finger protein 638	1e-22	4.74058	1.4254	0.404679	3.5223	0.000427814	0.00359511
isogroup16540	Serine/arginine-rich-splicing factor 11	7e-52	5.3393	-3.23572	0.390788	-8.27997	1.23e-16	1.27e-14
isogroup1656	General transcription factor 3C polypeptide 6	7e-68	5.14775	1.27763	0.351999	3.62964	0.000283816	0.00251588
isogroup16570	ZADH2	4e-39	6.03562	-1.46382	0.376345	-3.88956	0.000100424	0.00105596
isogroup166	Nucleoside diphosphate kinase	1e-106	350.885	1.15351	0.272936	4.22631	2.38e-05	0.00030892
isogroup16603	Transmembrane protein 60	6e-81	6.70362	-2.00359	0.412591	-4.85611	1.2e-06	2.21e-05
isogroup16683	Vitellogenin	1e-105	38.3115	3.70267	0.93368	3.96568	7.32e-05	0.000813094
isogroup1669	C-C motif chemokine 25	5e-37	11.3876	-5.11392	0.417888	-12.2375	1.96e-34	1.02e-31
isogroup167	Tetraspanin	5e-108	1557.89	-0.568146	0.154406	-3.67955	0.000233646	0.00213906
isogroup16729	Histone-lysine N-methyltransferase	4e-10	4.12763	-2.28183	0.368622	-6.19016	6.01e-10	2.31e-08
isogroup16731	Bifunctional protein (Fragment)	3e-46	6.41404	-2.19224	0.379614	-5.77492	7.7e-09	2.35e-07
isogroup1674	Pyruvate carboxylase (Fragment)	1e-15	16.4616	1.05423	0.272164	3.87351	0.000107279	0.00111559
isogroup16746	Nitric oxide synthase 1 (Neuronal) adaptor protein a (Fragment)	9e-66	10.4233	-1.57116	0.287801	-5.45919	4.78e-08	1.24e-06
isogroup1679	Interleukin-8 protein	3e-32	197.71	-2.29674	0.270773	-8.48216	2.21e-17	2.48e-15
isogroup168	Dihydropyrimidinase-related protein 2	2e-153	57.2295	-1.3453	0.192881	-6.97477	3.06e-12	1.72e-10
isogroup16830	Rho-related GTP-binding protein RhoB	7e-58	1.62146	3.18527	0.65929	4.83136	1.36e-06	2.47e-05
isogroup169	Chitinase domain-containing protein 1	3e-154	13.0833	0.922445	0.278017	3.31794	0.000906826	0.00674905
isogroup16914	Chemokine (C-C motif) ligand 20 (Fragment)	2e-09	1.51026	2.76254	0.761894	3.62589	0.00028797	0.00254448
isogroup16977	Solute carrier family 25 member 42	2e-23	5.089	2.06255	0.458538	4.49809	6.86e-06	0.000104591
isogroup16989	Tripartite motif-containing protein 39	5e-45	1.42514	2.3966	0.662087	3.61977	0.000294868	0.00259554
isogroup1718	Butyrophilin subfamily 1 member A1	2e-13	1.47413	-2.68326	0.717705	-3.73867	0.000184999	0.00175552
isogroup172	Uridine phosphorylase 2	9e-159	561.052	-1.11159	0.205314	-5.41409	6.16e-08	1.54e-06
isogroup17268	Putative monomastix minuta protein for 26s rrna sequence (Fragment)	3e-29	1525.16	0.937791	0.255267	3.67376	0.000239008	0.00218087
isogroup173	Probable methylmalonate-semialdehyde dehydrogenase [acylating] mitochondrial	1e-168	30.5565	-0.69149	0.217364	-3.18126	0.00146638	0.00999133
isogroup1734	Exostosin-2	5e-38	1.9558	-2.65636	0.51143	-5.19398	2.06e-07	4.53e-06
isogroup1735	Succinyl-CoA ligase [ADP/GDP-forming] subunit alpha mitochondrial	2e-177	68.6315	-0.448064	0.137325	-3.26281	0.00110315	0.00791896
isogroup1738	RBP4	3e-118	593.074	-1.97118	0.261807	-7.52915	5.11e-14	3.63e-12
isogroup174	Proteasome subunit beta type	1e-179	121.714	0.660673	0.128415	5.14481	2.68e-07	5.74e-06
isogroup17412	Carboxypeptidase A	1e-91	5.03928	1.4978	0.468608	3.19627	0.00139219	0.00958543
isogroup17469	Metalloendopeptidase (Fragment)	3e-20	8.12319	-4.40886	0.560982	-7.85918	3.87e-15	3.17e-13
isogroup17480	RNA polymerase II subunit A C-terminal domain phosphatase SSU72	7e-08	1.71114	-2.18228	0.543277	-4.01689	5.9e-05	0.000675106
isogroup17485	NADH dehydrogenase [ubiquinone] iron-sulfur protein 6 mitochondrial	1e-80	15.3355	-0.769498	0.241875	-3.18139	0.00146572	0.00999132
isogroup17529	Histidine-rich glycoprotein putative	1e-29	330.682	-0.740821	0.221194	-3.34919	0.000810487	0.0061458
isogroup176	Adenosine kinase 2	3e-133	648.223	-0.629006	0.145313	-4.32862	1.5e-05	0.000205399
isogroup17628	Sialic acid-binding Ig lectin 8 protein	1e-11	4.11122	3.81318	0.741471	5.14272	2.71e-07	5.8e-06
isogroup1764	Ammonium transporter Rh type B-B	2e-125	38.312	-2.8695	0.341246	-8.4089	4.14e-17	4.56e-15
isogroup1765	Phosphotriesterase-related protein	3e-18	31.7545	0.903494	0.212573	4.25027	2.14e-05	0.000281304
isogroup17710	C-type lectin domain family 4 member C	1e-11	3.09142	2.6248	0.58278	4.50392	6.67e-06	0.000102161
isogroup17721	TC1 transposase	7e-107	1.48443	-3.42461	0.593436	-5.77082	7.89e-09	2.41e-07
isogroup17726	FAST kinase domain-containing protein 3	8e-45	1.77487	-1.84355	0.553059	-3.33336	0.000858032	0.00644415
isogroup1774	Succinate dehydrogenase [ubiquinone] iron-sulfur subunit mitochondrial	4e-169	21.2472	-0.756452	0.220934	-3.42387	0.00061735	0.00489804
isogroup17854	Abhydrolase domain-containing protein 16A	1e-34	3.16193	-1.54694	0.405757	-3.81248	0.00013758	0.00136976
isogroup18	Hepatic leukemia factor	1e-159	60.6847	-2.98277	0.525743	-5.67344	1.4e-08	4.06e-07
isogroup180	Carboxylic ester hydrolase	3e-144	32.2736	1.45208	0.398465	3.64418	0.00026825	0.00240415
isogroup18004	Ubiquitin-conjugating enzyme E2 H	4e-26	23.3243	3.68378	0.444737	8.28305	1.2e-16	1.25e-14
isogroup18005	Oxysterol-binding protein	1e-17	2.02931	1.8752	0.517093	3.62642	0.000287377	0.00254146
isogroup1802	Smg-6 homolog nonsense mediated mRNA decay factor	1e-83	17.1889	1.00765	0.214421	4.69941	2.61e-06	4.4e-05
isogroup1803	Propionyl-CoA carboxylase beta chain mitochondrial	2e-132	8.82614	-0.983571	0.259766	-3.78637	0.000152862	0.00149186
isogroup18067	Alpha-2-macroglobulin	9e-07	5.51895	-2.41869	0.551684	-4.3842	1.16e-05	0.000164974
isogroup18068	Isochorismatase domain-containing protein 2 mitochondrial	3e-22	43.9374	2.00097	0.267946	7.46782	8.15e-14	5.6e-12
isogroup1807	Tetraspanin	5e-115	100.068	-1.0574	0.167311	-6.31996	2.62e-10	1.07e-08
isogroup1816	TAF13 RNA polymerase II TATA box binding protein (TBP)-associated factor 18kDa	4e-67	15.1669	0.667203	0.206893	3.22488	0.00126027	0.00882833
isogroup18202	Kininogen 1	4e-47	7.11133	-1.24575	0.291117	-4.2792	1.88e-05	0.000250289
isogroup1825	Hemicentin-1	1e-89	27.9513	-1.15658	0.206368	-5.60447	2.09e-08	5.81e-07
isogroup18267	Acyl-CoA dehydrogenase family member 11	9e-44	31.0948	0.852521	0.211776	4.02558	5.68e-05	0.00065518
isogroup18353	Vacuolar protein sorting-associated protein 37A	5e-57	8.03791	1.23109	0.310543	3.96433	7.36e-05	0.00081635
isogroup18358	Abnormal spindle microcephaly-associated protein	2e-27	27.49	-5.19788	0.338352	-15.3624	2.93e-53	4.41e-50
isogroup18389	Receptor protein serine/threonine kinase	6e-23	11.6884	-1.08255	0.25689	-4.21405	2.51e-05	0.000323403
isogroup18390	Tyrosine-protein phosphatase non-receptor type	1e-23	13.6026	-1.72657	0.372382	-4.63655	3.54e-06	5.8e-05
isogroup18413	DeltaC (Fragment)	2e-06	14.2873	-1.53987	0.342045	-4.50195	6.73e-06	0.000103019
isogroup1843	Glutathione S-transferase theta-1	3e-146	1498.79	0.634923	0.198669	3.19589	0.001394	0.00959383
isogroup18444	Nuclear fragile X mental retardation-interacting protein 1	5e-16	5.36941	-1.69238	0.413043	-4.09735	4.18e-05	0.000500697
isogroup18450	MICOS complex subunit MIC10	4e-31	26.1586	-0.543342	0.164094	-3.31116	0.000929108	0.00687923
isogroup18506	UDP-glucose 6-dehydrogenase (Fragment)	3e-31	3.50328	-2.18924	0.391545	-5.5913	2.25e-08	6.22e-07
isogroup18515	Cytochrome P450 2K1	2e-31	41.1817	-6.0511	0.472913	-12.7954	1.74e-37	1.19e-34
isogroup1852	MTHR (Fragment)	3e-57	27.454	2.5025	0.418969	5.97299	2.33e-09	7.94e-08
isogroup18522	Delta 4 (Fragment)	1e-60	7.86427	-1.42551	0.327009	-4.35923	1.31e-05	0.000181721
isogroup1861	Annexin A4	3e-141	12.2618	-1.07726	0.280895	-3.83511	0.000125508	0.00126756
isogroup18640	Dihydrolipoyl dehydrogenase (Fragment)	1e-71	11.2876	1.1179	0.295289	3.78578	0.000153224	0.00149395
isogroup1865	Chromosome 7 open reading frame 50	9e-54	9.25503	1.27926	0.352342	3.63072	0.000282629	0.00250758
isogroup18668	IgM heavy chain transmembrane form	7e-45	3.3467	2.72544	0.795658	3.42539	0.000613911	0.00487332
isogroup18707	Proteasome (Prosome macropain) 26S subunit non-ATPase 4b	3e-65	8.13058	-1.13174	0.315672	-3.58516	0.000336867	0.00292259
isogroup1875	Elastin microfibril interfacer 1 (Fragment)	2e-14	43.8967	-0.865731	0.166076	-5.21285	1.86e-07	4.15e-06
isogroup18815	Protein ABHD18	3e-86	0.803288	2.30129	0.692027	3.32543	0.000882829	0.0065965
isogroup18821	Histidine triad nucleotide-binding protein 3	3e-31	1.67095	-2.00149	0.507277	-3.94555	7.96e-05	0.00087183
isogroup1884	UNC50 (Fragment)	4e-174	14.7846	0.80692	0.194265	4.1537	3.27e-05	0.000405326
isogroup1885	Adenosine deaminase protein A	1e-155	1.84144	-1.66528	0.511337	-3.25671	0.00112713	0.00806055
isogroup18860	DNA-directed RNA polymerase II subunit RPB11-a	3e-79	25.4885	1.30309	0.167334	7.78734	6.84e-15	5.35e-13
isogroup18862	Essential MCU regulator mitochondrial	4e-24	25.0042	1.11665	0.172994	6.45485	1.08e-10	4.76e-09
isogroup18906	Rhophilin-2	1e-22	1.96683	2.01427	0.572981	3.51543	0.000439047	0.00366769
isogroup1892	Solute carrier family 25 member 38	2e-115	13.5989	-2.51024	0.554868	-4.52404	6.07e-06	9.4e-05
isogroup18920	TRDMT (Fragment)	4e-27	2.5059	2.96129	0.57344	5.16408	2.42e-07	5.26e-06
isogroup18949	TRAF family member-associated NF-kappa-B activator	3e-06	3.08261	-2.61069	0.501808	-5.20257	1.97e-07	4.35e-06
isogroup1897	Thioredoxin domain-containing protein 9	3e-118	7.5265	-0.977943	0.273458	-3.57622	0.000348603	0.00301141
isogroup19	A33 (Fragment)	2e-153	2449.1	-1.93268	0.248927	-7.76403	8.23e-15	6.33e-13
isogroup19030	FIg-Hepta	4e-55	1.28582	-3.40093	0.578036	-5.8836	4.01e-09	1.3e-07
isogroup1911	Probable 18S rRNA (guanine-N(7))-methyltransferase	6e-136	3.51882	-1.39493	0.34895	-3.99751	6.4e-05	0.000723262
isogroup19142	Phosphatidylinositol 4-kinase type 2-beta (Fragment)	2e-29	1.08143	-2.95106	0.608203	-4.8521	1.22e-06	2.25e-05
isogroup192	Chromosome 5 SCAF10152 whole genome shotgun sequence	2e-41	82.2789	-0.553031	0.143927	-3.84244	0.000121818	0.00123859
isogroup1924	Probable proline dehydrogenase 2	1e-172	66.1151	-1.08278	0.232585	-4.6554	3.23e-06	5.33e-05
isogroup1936	Golgin A4	3e-163	7.66796	0.944635	0.271848	3.47487	0.000511104	0.00417141
isogroup19386	Si:ch211-119d14.3	2e-08	15.9344	2.17686	0.237026	9.18408	4.15e-20	6.08e-18
isogroup19410	AFAD	2e-37	15.5764	1.36547	0.202015	6.75925	1.39e-11	6.91e-10
isogroup1942	Redox-regulatory protein FAM213A	8e-64	110.064	-1.26799	0.245029	-5.17484	2.28e-07	4.98e-06
isogroup1946	TPM4	4e-86	26.0268	0.988082	0.217353	4.54597	5.47e-06	8.55e-05
isogroup19533	Transmembrane protein 242	2e-09	7.18645	0.98819	0.278985	3.54209	0.000396973	0.00337225
isogroup19568	Pleckstrin domain-containing family F member 1	5e-93	1.79732	2.7175	0.684908	3.96768	7.26e-05	0.000807611
isogroup19653	BMS1	3e-45	3.06396	-2.68777	0.595567	-4.51296	6.39e-06	9.86e-05
isogroup1966	Inorganic pyrophosphatase	3e-148	65.741	-1.0772	0.245438	-4.3889	1.14e-05	0.000162013
isogroup1967	Argininosuccinate lyase	4e-171	2.96645	-4.34623	0.590753	-7.35711	1.88e-13	1.21e-11
isogroup1970	Acyl-coenzyme A thioesterase 2 mitochondrial	7e-49	2.36872	-2.78659	0.499717	-5.57635	2.46e-08	6.72e-07
isogroup19749	Periaxin (Fragment)	2e-38	1.3441	-2.23098	0.60253	-3.70268	0.000213333	0.00197597
isogroup19785	C-C motif chemokine	1e-30	3.13017	3.32436	0.605663	5.4888	4.05e-08	1.06e-06
isogroup19789	Transmembrane emp24 domain-containing protein 1	2e-37	8.76165	1.96168	0.509378	3.85113	0.000117574	0.00120444
isogroup19808	CUGBP Elav family member 5 (Fragment)	8e-42	5.04627	-4.96345	0.502368	-9.8801	5.08e-23	1.03e-20
isogroup19821	Solute carrier family 16 (Monocarboxylic acid transporters) member 2 (Fragment)	4e-21	1.11421	3.16931	0.752859	4.2097	2.56e-05	0.000328281
isogroup19949	Ribonuclease kappa-A	1e-47	1.92794	3.61187	0.70185	5.14622	2.66e-07	5.7e-06
isogroup200	NADPH--cytochrome P450 reductase (Fragments)	4e-180	73.5205	-2.94223	0.287171	-10.2456	1.24e-24	3.11e-22
isogroup2006	Crystallin J1B	1e-54	186.279	-2.29608	0.241533	-9.50628	1.98e-21	3.27e-19
isogroup2013	Prostaglandin reductase 1	1e-133	21.4737	-0.884918	0.215846	-4.09976	4.14e-05	0.000496501
isogroup20157	Fibronectin	2e-06	2.18283	-3.51371	0.649239	-5.41204	6.23e-08	1.56e-06
isogroup2017	Down syndrome critical region protein 3 homolog	3e-174	6.99208	1.06948	0.292413	3.65745	0.000254738	0.00230004
isogroup2019	BCL2/adenovirus E1B protein-interacting protein 3	4e-119	72.2333	0.483616	0.142857	3.38532	0.000710953	0.00551445
isogroup20195	Hydroxyacyl-thioester dehydratase type 2 mitochondrial	4e-26	19.2016	-1.67242	0.183726	-9.1028	8.8e-20	1.23e-17
isogroup2024	Cytochrome P450 CYP2N	5e-158	5.88418	-1.77945	0.409243	-4.34815	1.37e-05	0.000189836
isogroup20242	MHD domain-containing death-inducing protein	2e-53	3.64871	1.36047	0.407924	3.33511	0.000852663	0.00641241
isogroup20278	Abl interactor 1	2e-49	21.277	-2.52351	0.191054	-13.2084	7.85e-40	6.23e-37
isogroup20285	Ankyrin repeat and protein kinase domain-containing protein 1	3e-14	7.53225	2.2594	0.345517	6.53919	6.19e-11	2.83e-09
isogroup2038	Transmembrane emp24 domain trafficking protein 2	2e-129	12.3589	-1.62763	0.270624	-6.01435	1.81e-09	6.3e-08
isogroup20398	Complement factor H-related protein 1	1e-31	15.242	-3.11378	0.341072	-9.12941	6.89e-20	9.74e-18
isogroup20440	Serum lectin isoform 2	2e-28	1.78141	-3.02655	0.928061	-3.26116	0.00110958	0.00796139
isogroup2046	Ras association (RalGDS/AF-6) domain family 1	4e-165	1.09137	-2.44965	0.560064	-4.37388	1.22e-05	0.000171845
isogroup2056	Kelch 32 (Fragment)	2e-37	7.33759	1.1075	0.279792	3.95828	7.55e-05	0.000833291
isogroup2058	IF4G1 (Fragment)	7e-156	13.6499	-1.53788	0.321591	-4.78209	1.73e-06	3.08e-05
isogroup206	Metalloendopeptidase	4e-09	384.567	-0.90493	0.212136	-4.26579	1.99e-05	0.00026393
isogroup2064	Solute carrier family 22 member 6	3e-162	105.458	-1.17891	0.237393	-4.96608	6.83e-07	1.33e-05
isogroup2080	Carbonyl reductase 20beta-hydroxysteroid dehydrogenase	7e-170	127.965	-0.574415	0.151143	-3.80048	0.000144417	0.00142777
isogroup2082	C2orf25 homolog mitochondrial	2e-160	32.8346	1.79369	0.200313	8.95443	3.41e-19	4.64e-17
isogroup20823	Angiopoietin 3	2e-78	4.8191	2.47896	0.613182	4.04278	5.28e-05	0.000614558
isogroup2087	UPF0628 protein	2e-22	7.07316	-1.5545	0.410755	-3.7845	0.000154021	0.00150123
isogroup2090	Alpha-2-macroglobulin	2e-120	34.96	-1.85847	0.268855	-6.91254	4.76e-12	2.59e-10
isogroup2097	Intelectin-1a	4e-175	182.396	-2.36141	0.268648	-8.78999	1.5e-18	1.86e-16
isogroup2099	CC115	1e-76	11.4277	2.62305	0.305004	8.60005	7.97e-18	9.28e-16
isogroup21	Beta-ureidopropionase	2e-178	112.599	-0.770834	0.174212	-4.42469	9.66e-06	0.000140366
isogroup21073	Chloride intracellular channel protein	2e-48	11.3883	1.36051	0.305526	4.453	8.47e-06	0.000125643
isogroup21160	von Willebrand factor A domain-containing protein 5A	1e-32	4.99272	-2.59514	0.482844	-5.3747	7.67e-08	1.87e-06
isogroup21173	E3 ubiquitin-protein ligase CBL-B	7e-26	21.6238	-0.713879	0.191682	-3.72428	0.000195872	0.00184016
isogroup21199	DDE superfamily endonuclease (Fragment)	4e-36	3.09282	-3.81056	0.660651	-5.76788	8.03e-09	2.44e-07
isogroup212	Solute carrier family 2 facilitated glucose transporter member 2	1e-180	197.868	-0.729411	0.138648	-5.26088	1.43e-07	3.29e-06
isogroup2121	ATP-binding cassette sub-family F member 2	2e-153	4.06276	-2.29302	0.626406	-3.6606	0.000251625	0.00227944
isogroup2123	Ovarian tumor suppressor candidate 2	1e-130	17.661	-0.655428	0.173514	-3.77738	0.000158484	0.00154025
isogroup2126	GTPase IMAP family member 4	9e-50	127.716	-1.10612	0.191357	-5.78041	7.45e-09	2.28e-07
isogroup213	AKAP2 (Fragment)	5e-51	75.2658	-0.856582	0.177221	-4.8334	1.34e-06	2.45e-05
isogroup21339	Complement C3	8e-75	12.6484	1.53044	0.387632	3.94817	7.88e-05	0.000863915
isogroup21349	IgM heavy chain transmembrane form	1e-44	21.5398	-2.09337	0.584807	-3.5796	0.000344124	0.00297784
isogroup21356	C-type lectin	7e-12	7.34414	3.59415	0.644544	5.57627	2.46e-08	6.72e-07
isogroup2136	Eukaryotic initiation factor 4A-II	1e-138	83.4205	-0.832134	0.22152	-3.75647	0.000172327	0.0016519
isogroup21428	Solute carrier family 44 member 2	1e-51	7.87198	-3.07412	0.402153	-7.64415	2.1e-14	1.55e-12
isogroup21432	ATP-dependent DNA helicase	4e-15	8.9154	-2.92591	0.622699	-4.69875	2.62e-06	4.41e-05
isogroup2144	Probable thiopurine S-methyltransferase	4e-150	111.839	-2.05138	0.277528	-7.39163	1.45e-13	9.51e-12
isogroup21443	Lymphocyte antigen 6D (Fragment)	4e-21	18.4308	-3.69128	0.524432	-7.03862	1.94e-12	1.12e-10
isogroup2155	AMBP	2e-72	214.18	-1.60466	0.254486	-6.30548	2.87e-10	1.18e-08
isogroup21588	Nibrin	4e-08	3.13516	1.70688	0.448526	3.80554	0.000141498	0.00140459
isogroup2166	Probable assembly chaperone of rpl4	8e-28	7.32965	1.16084	0.323799	3.58508	0.000336978	0.0029227
isogroup2170	Anaphase promoting complex subunit 15	2e-35	4.86782	1.33497	0.368957	3.61822	0.000296635	0.00261033
isogroup21801	TLK2 (Fragment)	9e-53	1.36286	-2.28153	0.574251	-3.97306	7.1e-05	0.000791946
isogroup219	Lysosomal protective protein	1e-149	38.4878	-0.739049	0.199106	-3.71183	0.000205764	0.00192112
isogroup21901	Solute carrier family 6 (Neurotransmitter transporter taurine) member 6a (Fragment)	6e-63	3.03692	-2.0472	0.436701	-4.68787	2.76e-06	4.64e-05
isogroup2192	CD2 antigen cytoplasmic tail-binding protein 2	2e-157	20.1991	1.09201	0.222215	4.91421	8.91e-07	1.69e-05
isogroup2193	Deoxynucleotidyltransferase terminal-interacting protein 2	3e-159	3.56995	-2.08438	0.496561	-4.19763	2.7e-05	0.000343068
isogroup2197	Corticosteroid-binding globulin	1e-105	107.324	-0.879542	0.173204	-5.07806	3.81e-07	7.87e-06
isogroup22	Deleted in malignant brain tumors 1 protein	1e-178	356.128	-0.330448	0.0851553	-3.88054	0.000104226	0.00108797
isogroup2202	Apolipoprotein A-I	5e-114	35235.6	-0.803131	0.163788	-4.90348	9.42e-07	1.77e-05
isogroup22109	AP2A1	3e-88	4.06351	2.90291	0.4714	6.15805	7.36e-10	2.77e-08
isogroup22168	Chromosome 7 SCAF14650 whole genome shotgun sequence (Fragment)	1e-16	5.14659	-1.83246	0.486772	-3.76451	0.000166875	0.00160781
isogroup2218	Chromosome 6 open reading frame 62	2e-155	3.7818	2.47481	0.507217	4.87918	1.07e-06	1.99e-05
isogroup22194	Coiled-coil domain-containing protein 12	2e-63	8.98273	1.31944	0.326952	4.03559	5.45e-05	0.000630292
isogroup22259	Chromosome 6 open reading frame 136	5e-70	1.74938	3.54655	0.817513	4.33822	1.44e-05	0.000197436
isogroup2260	Retinol dehydrogenase 3	8e-110	245.826	-1.42702	0.216154	-6.60188	4.06e-11	1.91e-09
isogroup22627	Receptor protein-tyrosine kinase	3e-56	1.40657	-1.8511	0.580784	-3.18724	0.00143639	0.00982695
isogroup2267	UDP-N-acetylhexosamine pyrophosphorylase 1 protein	8e-104	14.2301	-0.979576	0.204655	-4.78648	1.7e-06	3.02e-05
isogroup2268	Fibrinogen gamma chain	8e-31	17.3617	-1.17345	0.344478	-3.40646	0.000658122	0.0051658
isogroup2280	3-hydroxybutyrate dehydrogenase type 2	6e-140	26.6382	0.854238	0.256856	3.32574	0.000881827	0.00659065
isogroup22804	SARDH (Fragment)	3e-98	8.31384	1.25974	0.337677	3.73061	0.000191018	0.00180354
isogroup2282	ZMAT5	3e-85	1.24569	2.54559	0.706474	3.60323	0.000314284	0.0027496
isogroup22967	Pol protein (Fragment)	2e-17	1.51879	-1.77697	0.522543	-3.40061	0.00067235	0.00526241
isogroup230	UDP-glucuronosyltransferase 2A1	3e-135	34.3448	-4.21006	0.374038	-11.2557	2.17e-29	8.08e-27
isogroup23018	Leucine-rich repeat-containing protein 40	2e-28	2.64033	1.56883	0.443492	3.53744	0.000404032	0.00342547
isogroup23020	Oxysterol-binding protein	1e-25	1.83058	-2.37379	0.527059	-4.50384	6.67e-06	0.000102161
isogroup23043	Putative transposase	4e-26	1.30635	-1.86848	0.566376	-3.29901	0.00097027	0.0071124
isogroup2305	Poly [ADP-ribose] polymerase	1e-88	2.22949	-1.70709	0.506664	-3.36927	0.000753684	0.00578195
isogroup23057	GDNF family receptor alpha-1	3e-73	3.29255	-1.9644	0.495858	-3.96161	7.44e-05	0.000823276
isogroup23072	C2 domain-containing protein	2e-53	56.6168	1.26509	0.364508	3.47068	0.000519148	0.00422399
isogroup23169	Zona pellucida protein Ba	9e-31	46.6255	3.80207	0.933387	4.07341	4.63e-05	0.000547481
isogroup23287	Chromosome 19 SCAF15051 whole genome shotgun sequence	3e-64	6.73167	-1.49341	0.301818	-4.94802	7.5e-07	1.45e-05
isogroup233	C-type lectin domain family 17 member A	1e-72	471.454	-0.470334	0.123122	-3.82005	0.000133424	0.00133312
isogroup23312	Complement C3	4e-24	4.16304	-2.19478	0.521238	-4.2107	2.55e-05	0.000327202
isogroup23319	Protein strawberry notch	2e-08	7.89378	-1.57766	0.310235	-5.08538	3.67e-07	7.59e-06
isogroup23329	Chymotrypsin B (Fragment)	2e-86	2067.41	2.24676	0.367098	6.12032	9.34e-10	3.46e-08
isogroup23374	RNA polymerase-associated protein LEO1	3e-21	14.7343	0.929808	0.271301	3.42722	0.000609792	0.00484572
isogroup23390	Protein SPT2 homolog	2e-30	5.80721	-2.40153	0.34613	-6.93822	3.97e-12	2.19e-10
isogroup234	Fetuin-B (Fragment)	4e-170	100.568	-0.804806	0.188956	-4.25922	2.05e-05	0.000271295
isogroup2344	Serum lectin isoform 3	4e-62	149.627	-6.91413	0.436254	-15.8489	1.43e-56	2.4e-53
isogroup2350	Protein jagunal	5e-123	14.4809	-1.43091	0.292477	-4.8924	9.96e-07	1.86e-05
isogroup2358	Magnesium transporter MRS2 mitochondrial	6e-13	4.75272	1.46595	0.4154	3.529	0.000417129	0.00352067
isogroup23603	LMBR1 domain containing 2a	8e-36	2.0777	-2.58175	0.532	-4.85292	1.22e-06	2.24e-05
isogroup2367	Eva1	3e-26	705.159	-3.2129	0.439657	-7.30774	2.72e-13	1.71e-11
isogroup23817	Leukocyte cell-derived chemotaxin-2	4e-50	23.6387	-1.44812	0.402507	-3.59775	0.000320978	0.00280004
isogroup23865	Retinoic acid receptor RXR-beta-A	1e-50	13.7236	-2.53073	0.283492	-8.92701	4.38e-19	5.87e-17
isogroup2394	Kinase	8e-129	8.26762	1.07332	0.282471	3.79975	0.000144843	0.00142933
isogroup23960	Large neutral amino acids transporter small subunit 4	9e-09	6.59519	1.89263	0.392571	4.82111	1.43e-06	2.59e-05
isogroup24	Nuclear receptor subfamily 5 group A member 2	4e-158	33.5843	-0.793449	0.18288	-4.33864	1.43e-05	0.000197152
isogroup2400	Hemicentin-1	1e-163	4.8056	-1.92968	0.35501	-5.43558	5.46e-08	1.39e-06
isogroup24054	Dolichyldiphosphatase 1	6e-29	6.33143	2.35574	0.522165	4.51149	6.44e-06	9.91e-05
isogroup2407	FYVE and coiled-coil domain-containing protein 1	6e-112	17.6672	1.09239	0.238183	4.58635	4.51e-06	7.2e-05
isogroup2414	NLTP	6e-86	117.539	1.29521	0.204299	6.33976	2.3e-10	9.52e-09
isogroup24156	Calumenin	7e-09	4.95717	-1.72321	0.435367	-3.95805	7.56e-05	0.000833799
isogroup2420	FZD8 (Fragment)	8e-146	57.3887	1.18356	0.275935	4.28925	1.79e-05	0.000240821
isogroup2421	Kininogen 1	1e-38	17.8924	-1.08667	0.307368	-3.53541	0.000407146	0.00344593
isogroup24259	CHCH domain-containing protein C22orf16 mitochondrial	3e-21	68.3725	-1.534	0.220693	-6.95082	3.63e-12	2.01e-10
isogroup2429	Ependymin (Fragment)	4e-57	188.593	0.803243	0.233892	3.43424	0.000594212	0.00474567
isogroup24404	Claudin	2e-31	3.531	3.07068	0.559026	5.49292	3.95e-08	1.04e-06
isogroup2443	GOGA7	2e-96	13.0787	0.809793	0.238473	3.39575	0.000684409	0.00534016
isogroup2444	Ubiquitin modifier-activating enzyme ATG7 protein (Fragment)	3e-122	3.87667	1.52963	0.413035	3.70338	0.000212745	0.00197286
isogroup2448	Transcription factor BTF3	3e-84	28.2609	0.67078	0.174171	3.85127	0.000117506	0.00120444
isogroup2458	Translocon-associated protein subunit delta	6e-113	149.767	-0.516243	0.161739	-3.19182	0.0014138	0.00970153
isogroup2463	Mediator of RNA polymerase II transcription subunit 19-A	9e-111	16.9084	-0.753584	0.212139	-3.55232	0.000381857	0.00325853
isogroup24646	TERF1-interacting nuclear factor 2	1e-09	3.69376	2.02088	0.460414	4.38926	1.14e-05	0.000161941
isogroup2465	AQP1	8e-176	46.3633	2.11805	0.289703	7.31112	2.65e-13	1.67e-11
isogroup247	Alpha-2-antiplasmin	6e-80	582.441	-0.620728	0.129759	-4.7837	1.72e-06	3.06e-05
isogroup2470	Receptor expression-enhancing protein	9e-24	5.38225	-1.7608	0.339851	-5.1811	2.21e-07	4.83e-06
isogroup24729	NADH dehydrogenase [ubiquinone] 1 alpha subcomplex subunit 3	2e-48	27.9245	0.595505	0.166393	3.57891	0.000345034	0.00298228
isogroup24733	Zinc finger protein 167	6e-28	5.80057	-4.96155	0.469745	-10.5622	4.46e-26	1.22e-23
isogroup2492	Cell division cycle and apoptosis regulator 1	2e-116	98.2688	1.54362	0.358578	4.30485	1.67e-05	0.000226483
isogroup2501	RCL1	6e-47	73.9365	-0.986871	0.250304	-3.94268	8.06e-05	0.000881036
isogroup25074	Glutamate-rich WD repeat containing 1 putative	4e-48	1.21486	-1.8038	0.55576	-3.24565	0.00117182	0.00834636
isogroup25075	Zinc finger protein 638	1e-09	11.8907	1.19964	0.27242	4.40364	1.06e-05	0.000152586
isogroup2514	Eukaryotic translation initiation factor 4E binding protein 3	6e-51	264.973	-0.968227	0.285416	-3.39234	0.000692995	0.00539055
isogroup25151	HELZ2 (Fragment)	2e-62	2.2549	3.10195	0.658718	4.70908	2.49e-06	4.23e-05
isogroup252	Putative TBT binding protein	4e-64	13200.8	-1.92753	0.262526	-7.34226	2.1e-13	1.34e-11
isogroup2521	Chromosome 15 open reading frame 39 (Fragment)	2e-49	17.2728	1.20142	0.279586	4.29712	1.73e-05	0.000233581
isogroup25223	SESN1	1e-46	34.9449	0.68835	0.213768	3.22008	0.00128156	0.00895664
isogroup2540	Iodotyrosine dehalogenase 1	1e-151	72.4562	-1.25678	0.183225	-6.85919	6.93e-12	3.67e-10
isogroup2542	Glutathione S-transferase(Rho)	8e-140	739.256	0.852887	0.25023	3.4084	0.000653438	0.00513438
isogroup2545	ATP-binding cassette sub-family G member 2 isoform X1	4e-141	45.0739	-0.650427	0.177394	-3.66656	0.000245831	0.00223504
isogroup2546	Palmitoyltransferase ZDHHC6	3e-165	37.5655	1.36757	0.29219	4.68043	2.86e-06	4.79e-05
isogroup25481	SCAN domain-containing protein 3 (Fragment)	4e-60	1.78111	-4.27043	0.675575	-6.32117	2.6e-10	1.07e-08
isogroup2552	Complement factor h (Fragment)	5e-15	21.4542	1.58291	0.401119	3.94624	7.94e-05	0.000869951
isogroup2560	Transporter SSS family domain-containing protein	1e-24	29.8966	1.07464	0.271741	3.95465	7.66e-05	0.000842674
isogroup257	G-rich RNA sequence binding factor 1	6e-169	3.84242	-1.50717	0.408384	-3.69056	0.000223759	0.00205855
isogroup2572	Zinc-binding protein A33	1e-43	2278.3	-2.54668	0.210273	-12.1113	9.2e-34	4.48e-31
isogroup258	Transmembrane protein 106B	6e-101	33.9458	-1.57164	0.271399	-5.7909	7e-09	2.15e-07
isogroup25801	Fibroblast growth factor receptor 1	2e-12	5.87339	-2.90549	0.490742	-5.92061	3.21e-09	1.06e-07
isogroup25823	Fish-egg lectin	1e-06	3.2536	-3.98556	0.678701	-5.87234	4.3e-09	1.38e-07
isogroup2583	Zinc finger BED domain-containing protein 1	1e-16	1.42691	-2.89952	0.558859	-5.1883	2.12e-07	4.66e-06
isogroup2586	Ubiquitin domain-containing protein UBFD1	7e-155	16.8439	0.784672	0.229837	3.41404	0.000640072	0.00504908
isogroup2587	Diablo homolog mitochondrial	1e-119	7.63197	1.42679	0.326268	4.37307	1.23e-05	0.00017224
isogroup2588	Unconventional prefoldin RPB5 interactor 1	6e-122	8.76389	1.60342	0.311982	5.13949	2.75e-07	5.88e-06
isogroup2598	Chromosome 2 SCAF14738 whole genome shotgun sequence (Fragment)	1e-177	14.9049	0.950447	0.260973	3.64193	0.000270599	0.00242078
isogroup26	UDP-glucuronosyltransferase 1-1	9e-173	42.9431	1.01776	0.162754	6.25334	4.02e-10	1.6e-08
isogroup2603	Alpha-mannosidase	4e-54	29.8961	-1.3493	0.171706	-7.85821	3.9e-15	3.18e-13
isogroup26035	Brain-type fatty acid binding protein	3e-14	113.621	-2.12476	0.662766	-3.2059	0.0013464	0.00933341
isogroup2609	TRMT1 protein	1e-142	4.68772	1.59007	0.394454	4.03107	5.55e-05	0.000641058
isogroup26114	Complement factor H-related protein 1	1e-24	64.3671	-2.54454	0.317339	-8.01837	1.07e-15	9.45e-14
isogroup2613	AQP12	6e-131	103.854	2.56831	0.512588	5.01047	5.43e-07	1.08e-05
isogroup26173	Transposase	5e-12	1.31479	-2.99139	0.720279	-4.15309	3.28e-05	0.000406241
isogroup262	UDP-glucuronosyltransferase 2B4	5e-126	33.7682	-1.1935	0.308956	-3.86301	0.000111996	0.00115786
isogroup2620	Nuclear receptor subfamily 5 group A member 2 (Fragment)	5e-12	66.9664	-0.534074	0.141952	-3.76236	0.000168317	0.00161964
isogroup2621	IMP3	6e-111	2.59354	-1.98027	0.507376	-3.90297	9.5e-05	0.00101114
isogroup2628	Natural killer-tumor recognition sequence protein (Fragment)	9e-149	10.7654	1.24195	0.280952	4.42051	9.85e-06	0.000142832
isogroup2633	CCAAT/enhancer binding protein delta2 protein	6e-54	157.842	-1.36762	0.419961	-3.25655	0.00112775	0.00806295
isogroup2638	Tributyltin binding protein type 1	9e-89	49.5321	1.43846	0.387644	3.71078	0.000206623	0.00192735
isogroup26552	Protein prune	4e-38	2.04179	2.0116	0.577072	3.48587	0.000490542	0.00402428
isogroup26580	MXRA7 (Fragment)	2e-26	2.52997	2.06403	0.502746	4.10552	4.03e-05	0.000486038
isogroup2682	Zinc finger BED domain-containing protein 1	3e-07	53.9907	-1.2597	0.18648	-6.75517	1.43e-11	7.09e-10
isogroup2684	Serine/threonine-protein phosphatase	2e-12	14.2889	-1.92039	0.191718	-10.0167	1.29e-23	2.79e-21
isogroup2691	Maspardin	6e-24	14.2969	1.69541	0.282256	6.00664	1.89e-09	6.57e-08
isogroup27004	NADH-ubiquinone oxidoreductase chain 3	3e-28	151.898	-0.913795	0.237965	-3.84004	0.000123012	0.00124905
isogroup27083	Crystallin zeta (Quinone reductase) (Fragment)	3e-15	39.2729	0.744183	0.2241	3.32076	0.000897731	0.00669458
isogroup27107	Interferon-induced GTP-binding protein Mx2 (Fragment)	2e-10	4.85781	-1.81342	0.450815	-4.02253	5.76e-05	0.000662223
isogroup27191	Solute carrier family 38 member 4	1e-22	3.6038	-2.56249	0.555321	-4.61444	3.94e-06	6.37e-05
isogroup2721	MHC class I antigen (Fragment)	9e-81	9.18052	2.13814	0.609508	3.50798	0.000451519	0.00375212
isogroup2735	Meiosis-specific with OB domain-containing protein	9e-77	6.56364	-0.876304	0.267941	-3.27051	0.00107354	0.00774334
isogroup27436	Chromosome 5 SCAF14581 whole genome shotgun sequence (Fragment)	2e-13	7.24621	-1.3154	0.323561	-4.06538	4.8e-05	0.000564232
isogroup275	Bystin	3e-157	9.96796	-1.65881	0.386228	-4.2949	1.75e-05	0.000235397
isogroup27523	Metalloendopeptidase	4e-10	34.9588	3.15367	0.480961	6.55702	5.49e-11	2.53e-09
isogroup2753	Catechol-O-methyltransferase b	9e-170	194.814	-0.784944	0.189363	-4.14517	3.4e-05	0.000418139
isogroup27533	Cytolysin Src-1 (Fragment)	2e-16	7.67743	-1.8337	0.332129	-5.52105	3.37e-08	8.95e-07
isogroup2757	Glucagon receptor	1e-53	3.28594	2.95731	0.532745	5.55107	2.84e-08	7.65e-07
isogroup2766	HMG box-containing protein 1	8e-144	4.79868	1.81921	0.415416	4.37926	1.19e-05	0.00016805
isogroup27720	Homocysteine-responsive endoplasmic reticulum-resident ubiquitin domain member 2 protein	5e-09	13.6272	-2.50365	0.324323	-7.71963	1.17e-14	8.75e-13
isogroup27760	Fanconi anemia group F protein	3e-45	4.57924	-2.10534	0.390951	-5.38518	7.24e-08	1.78e-06
isogroup2777	Mucolipin-3	4e-94	1.45187	-2.89797	0.691946	-4.18815	2.81e-05	0.00035546
isogroup27802	Spatacsin	8e-06	5.52699	1.05762	0.3282	3.2225	0.00127076	0.0088915
isogroup27811	Polyubiquitin (Fragment)	3e-75	34.3138	3.40089	0.332953	10.2143	1.71e-24	4.19e-22
isogroup2790	Glucosamine--fructose-6-phosphate aminotransferase [isomerizing] 1	9e-140	10.416	1.18419	0.27184	4.35618	1.32e-05	0.000183929
isogroup2791	Chromosome 18 SCAF15038 whole genome shotgun sequence (Fragment)	3e-79	105.55	-0.719765	0.187661	-3.83545	0.000125335	0.00126624
isogroup27925	Neutral and basic amino acid transport protein rBAT	2e-27	3.83753	-3.07925	0.511798	-6.01653	1.78e-09	6.22e-08
isogroup2793	Lamin-B receptor (Fragment)	2e-177	15.5587	1.75708	0.235737	7.45357	9.08e-14	6.12e-12
isogroup27931	Alpha-2-macroglobulin (Fragment)	2e-53	12.4881	2.14591	0.440044	4.87657	1.08e-06	2.01e-05
isogroup27951	CPEB4	3e-76	1.36087	-2.40844	0.715064	-3.36814	0.00075677	0.0058012
isogroup2806	Selenoprotein O	1e-158	6.80202	1.1828	0.349526	3.38402	0.00071434	0.00553788
isogroup28087	Complement component c3	4e-47	3.29292	-2.84282	0.525782	-5.40684	6.41e-08	1.6e-06
isogroup28121	Isocitrate dehydrogenase [NADP]	5e-94	1.8484	-3.1016	0.790762	-3.92229	8.77e-05	0.000944331
isogroup28166	Alanine aminotransferase 2	2e-19	15.3843	-2.50975	0.35926	-6.98587	2.83e-12	1.59e-10
isogroup2818	Chromosome 2 SCAF14781 whole genome shotgun sequence (Fragment)	3e-74	4.99395	-2.22655	0.418519	-5.32008	1.04e-07	2.46e-06
isogroup28205	Ubiquitin specific peptidase like 1	2e-09	1.96911	-2.38015	0.599882	-3.9677	7.26e-05	0.000807611
isogroup2830	Natterin protein	1e-125	30.6357	-1.33124	0.407968	-3.2631	0.00110199	0.00791255
isogroup2833	M-phase phosphoprotein 6	1e-68	4.77946	-1.62289	0.490315	-3.30989	0.00093332	0.00690426
isogroup2834	Zinc finger BED domain-containing protein 1	5e-144	1.31649	-3.38342	0.575005	-5.88415	4e-09	1.29e-07
isogroup28365	Serum lectin isoform 1	4e-25	1.15335	-3.50316	0.751531	-4.66136	3.14e-06	5.2e-05
isogroup28413	Adenylate kinase 7	6e-17	2.10922	-4.31051	0.643909	-6.69429	2.17e-11	1.05e-09
isogroup285	UDP-glucuronosyltransferase 2B31	2e-112	79.538	-1.35536	0.305509	-4.4364	9.15e-06	0.000134108
isogroup28512	ATP-binding cassette sub-family E member 1	2e-47	12.1451	-1.20211	0.307923	-3.90393	9.46e-05	0.0010089
isogroup2857	Calcyclin binding protein	3e-109	4.25398	-1.15391	0.357336	-3.2292	0.00124137	0.00872763
isogroup28642	Septin-4	1e-54	2.12229	2.67322	0.734404	3.63998	0.000272656	0.00243629
isogroup28647	15.5 kDa protein	1e-15	1.34496	3.3001	0.654407	5.04289	4.59e-07	9.26e-06
isogroup2868	Protein dpy-19	3e-53	190.712	-0.846367	0.226656	-3.73416	0.000188345	0.00178389
isogroup2869	Specifically androgen-regulated protein	3e-67	19.7046	1.01101	0.212156	4.7654	1.88e-06	3.32e-05
isogroup28759	Zinc finger protein 721	3e-44	7.16898	2.26697	0.330795	6.8531	7.23e-12	3.82e-10
isogroup28798	Chromobox protein homolog 7	6e-07	4.52262	-1.82493	0.529873	-3.44409	0.00057299	0.00459647
isogroup28909	Sterile alpha motif domain-containing 9 protein (Fragment)	7e-39	1.46978	-3.20328	0.692355	-4.62664	3.72e-06	6.05e-05
isogroup2893	Zona pellucida sperm-binding protein 3	3e-18	90.5135	-1.49409	0.186772	-7.99954	1.25e-15	1.09e-13
isogroup28931	GTPase IMAP family member 4	2e-06	11.6693	3.11994	0.537425	5.80535	6.42e-09	1.99e-07
isogroup2894	MDR1	8e-33	35.8799	-0.714306	0.176576	-4.04531	5.23e-05	0.000608428
isogroup2923	Methionine-R-sulfoxide reductase B1-A	2e-58	27.6038	-1.55461	0.199404	-7.79629	6.38e-15	5.02e-13
isogroup2927	RAP2C member of RAS oncogene family (Fragment)	2e-38	2.8461	3.42581	0.569199	6.01866	1.76e-09	6.16e-08
isogroup29340	Mannose-6-phosphate isomerase	6e-36	1.71913	2.23757	0.651799	3.43291	0.000597141	0.00476402
isogroup29382	CREB binding protein a (Fragment)	1e-21	33.6901	0.738526	0.167387	4.4121	1.02e-05	0.000147574
isogroup2943	Troponin T cardiac muscle	2e-103	2.37835	-1.41238	0.44386	-3.18203	0.00146245	0.00997128
isogroup29439	Forkhead box O3b (Fragment)	1e-10	4.33981	-2.0707	0.49319	-4.1986	2.69e-05	0.000342178
isogroup295	Long-chain fatty acid transport protein 3	2e-178	51.5539	0.731734	0.163712	4.46965	7.83e-06	0.000117724
isogroup29667	Ig heavy chain V region MOPC 141 (Fragment)	6e-28	1.34932	2.3763	0.684221	3.473	0.000514669	0.00419257
isogroup2967	Myoglobin	9e-61	13.9006	2.83192	0.582897	4.85834	1.18e-06	2.19e-05
isogroup2974	15-hydroxyprostaglandin dehydrogenase (NAD(+))	1e-167	3.32335	1.66058	0.433334	3.83211	0.00012705	0.00128099
isogroup29751	Ectonucleotide pyrophosphatase/phosphodiesterase family member 2	4e-44	10.0199	1.56204	0.367203	4.25388	2.1e-05	0.000277285
isogroup29782	Dihydropyridine-sensitive L-type skeletal muscle calcium channel subunit alpha-1	3e-65	1.36964	3.7203	0.646411	5.75532	8.65e-09	2.62e-07
isogroup2980	Enoyl-Coenzyme A hydratase/3-hydroxyacyl Coenzyme A dehydrogenase (Fragment)	5e-79	142.928	1.50916	0.172214	8.76324	1.9e-18	2.33e-16
isogroup2981	Chromosome 2 SCAF14997 whole genome shotgun sequence (Fragment)	2e-161	1.46105	-3.60043	0.721494	-4.99024	6.03e-07	1.19e-05
isogroup2983	Ribose-phosphate pyrophosphokinase 1	1e-129	2.05009	-2.13008	0.505813	-4.21121	2.54e-05	0.000326939
isogroup29857	CHIA	1e-26	1.71593	3.00358	0.88691	3.38656	0.000707739	0.00549518
isogroup299	TOB1	2e-175	315.397	-1.36239	0.298992	-4.5566	5.2e-06	8.19e-05
isogroup30057	Calcium-binding mitochondrial carrier protein SCaMC-1-B	2e-39	0.934947	-2.70588	0.711075	-3.80533	0.000141616	0.0014053
isogroup30129	Complement C3	6e-61	4.11056	1.37569	0.423305	3.24989	0.00115449	0.00823854
isogroup3023	Nuclear receptor coactivator 4	2e-20	391.644	1.47764	0.263386	5.61018	2.02e-08	5.65e-07
isogroup30265	Peroxisome proliferator-activated receptor gamma coactivator-related protein 1	2e-30	1.16961	-2.47954	0.67793	-3.65752	0.000254668	0.00230004
isogroup3035	Alpha-class glutathione S-transferase	9e-132	461.605	-1.80345	0.298473	-6.04226	1.52e-09	5.38e-08
isogroup304	Ras-related C3 botulinum toxin substrate 1	2e-129	61.207	1.07398	0.242422	4.4302	9.41e-06	0.000137488
isogroup3042	RFT1 homolog	7e-92	4.63007	-1.42912	0.353038	-4.04807	5.16e-05	0.000602458
isogroup30476	Dihydropyridine-sensitive L-type skeletal muscle calcium channel subunit alpha-1	5e-78	0.824122	2.86388	0.765769	3.73987	0.000184115	0.00174933
isogroup3049	Interferon-induced protein 44	1e-38	5.40655	-2.26343	0.448235	-5.04966	4.43e-07	8.98e-06
isogroup305	Anti-Mullerian hormone	1e-156	8.69551	-2.31687	0.503364	-4.60278	4.17e-06	6.7e-05
isogroup3055	Peroxisomal membrane protein 2 22kDa (Fragment)	1e-108	121.297	0.85451	0.208714	4.09416	4.24e-05	0.000507041
isogroup30554	Eukaryotic translation initiation factor 2 subunit 3	6e-16	20.7151	-0.705885	0.200307	-3.52401	0.000425067	0.00357467
isogroup3066	Glucosamine-6-phosphate isomerase	3e-78	4.98585	1.31691	0.375501	3.50708	0.000453054	0.00376385
isogroup3068	Adenylyl cyclase (AC) class IV domain-containing protein (Fragment)	4e-103	4.58931	1.64371	0.513084	3.20359	0.00135725	0.00939425
isogroup307	Chromosome 17 SCAF14563 whole genome shotgun sequence (Fragment)	1e-06	62.831	-1.04802	0.189433	-5.5324	3.16e-08	8.43e-07
isogroup3081	Nucleolar protein 16	6e-90	7.16644	-1.46938	0.350178	-4.19609	2.72e-05	0.000344816
isogroup30815	Complement component c3	8e-18	18.331	-2.37214	0.478337	-4.95914	7.08e-07	1.37e-05
isogroup3085	Solute carrier family 12 member 5	4e-40	30.0259	-1.98042	0.313218	-6.32282	2.57e-10	1.06e-08
isogroup30963	Acyl-coenzyme A thioesterase 2 mitochondrial	1e-50	3.05784	2.84241	0.51346	5.5358	3.1e-08	8.3e-07
isogroup31	CLOCK-interacting pacemaker	7e-08	32.3353	-4.07746	0.652247	-6.2514	4.07e-10	1.62e-08
isogroup3106	2-oxo-4-hydroxy-4-carboxy-5-ureidoimidazoline decarboxylase	1e-46	105.557	-0.692573	0.20448	-3.38699	0.00070663	0.00548798
isogroup3109	Alpha-1-antitrypsin	2e-54	21.5178	2.44858	0.367511	6.6626	2.69e-11	1.29e-09
isogroup3113	CP13A (Fragment)	7e-139	12.7895	1.04969	0.300393	3.49437	0.000475174	0.00392275
isogroup31176	Chromobox protein	8e-34	3.30116	-2.43728	0.567708	-4.2932	1.76e-05	0.000236788
isogroup31185	Ubiquitin	2e-34	12.2477	4.4202	0.547363	8.07545	6.72e-16	6.22e-14
isogroup31221	3-oxo-5-beta-steroid 4-dehydrogenase	2e-56	5.88519	1.92707	0.406406	4.74173	2.12e-06	3.68e-05
isogroup3126	G-protein coupled receptor 39-1a	2e-33	23.609	-0.726869	0.198326	-3.66503	0.000247312	0.0022478
isogroup3128	SWI/SNF related matrix associated actin dependent regulator of chromatin subfamily a	8e-143	3.71861	1.80803	0.449703	4.0205	5.81e-05	0.000666432
isogroup313	Glycosyltransferase family 92 protein F13G3.3	1e-07	45.5502	-1.01467	0.253266	-4.00636	6.17e-05	0.000701457
isogroup3130	Gamma-interferon-inducible lysosomal thiol reductase	3e-153	40.3858	1.20864	0.231366	5.22394	1.75e-07	3.93e-06
isogroup31318	Ependymin	1e-06	86.8033	2.05754	0.401505	5.12456	2.98e-07	6.31e-06
isogroup3134	Protein lifeguard 1	5e-67	0.67071	-2.43903	0.661511	-3.68706	0.000226857	0.00208386
isogroup3148	Putative nuclease HARBI1	1e-149	0.811149	-2.3233	0.619952	-3.74755	0.000178571	0.00170309
isogroup31593	Vitellogenin B	4e-58	7507.28	7.51507	0.757979	9.91462	3.6e-23	7.58e-21
isogroup31605	Serum lectin isoform 3	1e-23	30.5233	5.06311	0.594343	8.51884	1.61e-17	1.82e-15
isogroup3162	E3 ubiquitin-protein ligase RNF8	3e-32	4.51312	-1.36195	0.397062	-3.43008	0.000603413	0.00480135
isogroup3175	PPUP2357 (Fragment)	8e-09	24.324	0.891582	0.245061	3.6382	0.000274545	0.00244882
isogroup31775	Metalloendopeptidase	1e-49	6.82792	1.98201	0.489351	4.05028	5.12e-05	0.000597547
isogroup31837	Aquaporin 8	3e-56	2.46349	3.6446	0.853089	4.27224	1.94e-05	0.000257206
isogroup3184	NADH dehydrogenase [ubiquinone] 1 alpha subcomplex subunit 8	7e-117	24.1493	-0.599402	0.185118	-3.23795	0.00120392	0.00852666
isogroup31840	RNA helicase	1e-12	62.2113	-1.23149	0.384872	-3.19974	0.00137553	0.00949026
isogroup31846	Neural Wiskott-Aldrich syndrome protein	7e-38	7.84671	-0.886719	0.235641	-3.763	0.000167885	0.00161599
isogroup3187	Alanine aminotransferase 2	3e-128	54.2276	-0.857482	0.226136	-3.79189	0.000149506	0.00146466
isogroup3191	UPF0729 protein	2e-44	59.9303	-1.08193	0.166579	-6.49502	8.3e-11	3.72e-09
isogroup3203	Dihydrofolate reductase	6e-117	51.8947	2.39317	0.194392	12.311	7.9e-35	4.25e-32
isogroup32065	Solute carrier family 22 member 16	5e-32	35.0164	1.91609	0.228804	8.37436	5.55e-17	5.94e-15
isogroup3218	Charged multivesicular body protein 7	4e-70	11.4179	0.912102	0.236679	3.85376	0.000116319	0.00119518
isogroup32209	Vitellogenin B	1e-54	40.8795	4.21134	0.91935	4.58078	4.63e-06	7.38e-05
isogroup3222	Antigen peptide transporter 2	6e-51	13.739	1.10158	0.245462	4.48778	7.2e-06	0.000109284
isogroup3223	N-acetylserotonin O-methyltransferase protein	2e-23	5.40718	-1.46942	0.411097	-3.57438	0.000351062	0.00302745
isogroup3226	Transcription initiation factor TFIID subunit 10 (Fragment)	1e-106	8.55092	-1.34488	0.328601	-4.09275	4.26e-05	0.00050973
isogroup32299	DNA-directed RNA polymerase III subunit RPC6	2e-58	12.086	-0.823487	0.237859	-3.46208	0.000536014	0.00433832
isogroup3231	Eukaryotic peptide chain release factor GTP-binding subunit ERF3B	5e-95	14.089	-1.99731	0.421449	-4.73914	2.15e-06	3.72e-05
isogroup327	Deoxynucleoside triphosphate triphosphohydrolase SAMHD1	5e-94	8.27608	3.06044	0.512962	5.96621	2.43e-09	8.23e-08
isogroup3272	Tetratricopeptide repeat	3e-172	7.01955	-1.96636	0.539876	-3.64225	0.000270265	0.00241934
isogroup32747	Nuclear ubiquitous casein and cyclin-dependent kinase substrate 1	3e-19	13.8615	0.957832	0.244779	3.91305	9.11e-05	0.000977062
isogroup3279	Activating transcription factor 7-interacting protein 1	8e-93	2.28773	1.86332	0.550884	3.38242	0.000718506	0.00556589
isogroup3281	DNA-directed RNA polymerase subunit	3e-67	4.80139	-1.90316	0.357402	-5.325	1.01e-07	2.4e-06
isogroup330	Sterol 26-hydroxylase mitochondrial	6e-154	39.0101	-2.4669	0.265786	-9.28153	1.67e-20	2.54e-18
isogroup3301	Cytochrome b5 type A (Microsomal)	4e-76	16.5147	-2.20797	0.311663	-7.0845	1.4e-12	8.16e-11
isogroup33033	Allantoicase	7e-27	45.8875	-0.888932	0.206512	-4.3045	1.67e-05	0.000226737
isogroup3310	Ferritin	3e-117	12.5895	1.16755	0.336657	3.46806	0.000524238	0.00426016
isogroup33149	Pentaxin	3e-11	1662.33	2.09569	0.436873	4.79702	1.61e-06	2.88e-05
isogroup3318	Chloride anion exchanger	4e-87	19.3595	1.51759	0.252629	6.0072	1.89e-09	6.56e-08
isogroup3320	Cystatin	4e-39	621.155	-1.44858	0.135255	-10.71	9.13e-27	2.8e-24
isogroup3329	C3orf1 homolog	3e-19	2.45596	-2.86581	0.5004	-5.72704	1.02e-08	3.04e-07
isogroup333	Cytochrome P450 2J2	2e-132	116.103	-4.28544	0.332282	-12.897	4.68e-38	3.36e-35
isogroup3349	Carboxylic ester hydrolase	2e-176	126.452	-3.45693	0.337453	-10.2442	1.26e-24	3.13e-22
isogroup335	Vitamin K-dependent protein S	1e-14	273.427	1.01121	0.229977	4.39702	1.1e-05	0.000156709
isogroup3357	CD48 antigen	4e-38	584.061	-1.22739	0.283902	-4.32329	1.54e-05	0.000210142
isogroup33587	Reverse transcriptase protein (Fragment)	4e-14	4.43041	3.76962	0.668512	5.63882	1.71e-08	4.9e-07
isogroup336	General transcription factor IIF subunit 2	2e-151	13.1047	-0.895077	0.257559	-3.47524	0.000510403	0.00416682
isogroup3366	Adenylosuccinate synthetase	9e-27	5.31975	-1.28351	0.369579	-3.47289	0.00051488	0.00419315
isogroup337	Hyaluronan-binding protein 2	4e-140	2563.88	-0.891901	0.148969	-5.98715	2.14e-09	7.33e-08
isogroup33722	Dehydrogenase/reductase SDR family member 4	2e-59	10.1086	2.53554	0.31192	8.12883	4.33e-16	4.07e-14
isogroup33895	Signal-induced proliferation-associated 1 protein 3	1e-63	3.42827	-1.55424	0.434747	-3.57505	0.000350156	0.0030205
isogroup339	Selenoprotein P	2e-79	9481.82	0.516121	0.125663	4.10717	4.01e-05	0.000482965
isogroup3393	5-hydroxyisourate hydrolase	9e-78	49.3273	-0.938404	0.209278	-4.48401	7.33e-06	0.000111064
isogroup3397	ADP-ribosylation factor 13B protein	3e-111	8.55929	-1.90611	0.339384	-5.61636	1.95e-08	5.5e-07
isogroup3400	Chromobox protein (Fragment)	6e-34	6.74409	1.95652	0.369681	5.29246	1.21e-07	2.82e-06
isogroup3405	Eukaryotic translation initiation factor 3 subunit F	9e-163	151.881	-0.497354	0.155337	-3.20177	0.00136587	0.00943656
isogroup34090	Matrix metalloproteinase-16	5e-47	1.74447	-2.38798	0.605526	-3.94364	8.03e-05	0.000878151
isogroup34227	Zinc finger BED domain containing 4	8e-14	0.745405	-2.78157	0.765814	-3.63218	0.000281036	0.00249659
isogroup34243	YF64	7e-58	9.60307	1.23058	0.378053	3.25505	0.00113371	0.00809982
isogroup3432	Multidrug and toxin extrusion protein	5e-35	6.32367	-3.7471	0.458654	-8.16977	3.09e-16	2.99e-14
isogroup3433	Glycine C-acetyltransferase	5e-178	34.3869	-0.928783	0.201445	-4.6106	4.01e-06	6.48e-05
isogroup346	Zinc finger protein 576	3e-15	18.3596	0.807836	0.205451	3.93202	8.42e-05	0.000912138
isogroup34698	Hepcidin (Fragment)	5e-12	1.65634	3.37849	0.84366	4.00457	6.21e-05	0.000705193
isogroup3473	Starch-binding domain-containing protein 1	3e-91	12.5755	1.33799	0.264538	5.05784	4.24e-07	8.69e-06
isogroup3479	Rho GDP-dissociation inhibitor 1 (Fragment)	1e-120	13.5999	-0.86404	0.236351	-3.65575	0.000256434	0.0023119
isogroup3482	Protein prune	4e-175	2.54757	3.46485	0.603501	5.74124	9.4e-09	2.82e-07
isogroup34852	E3 ubiquitin/ISG15 ligase TRIM25	5e-23	7.38089	4.03204	0.613699	6.57006	5.03e-11	2.34e-09
isogroup34983	GIMA4 (Fragment)	4e-41	6.14077	3.14579	0.697783	4.50826	6.54e-06	0.000100363
isogroup350	SPARC-related modular calcium-binding protein 2	5e-144	9.46326	-2.43187	0.393823	-6.17503	6.61e-10	2.52e-08
isogroup35038	Granulins	6e-18	1.10754	-2.03696	0.606615	-3.35792	0.000785323	0.00598055
isogroup35108	RTJK (Fragment)	3e-34	19.2527	1.86871	0.376626	4.9617	6.99e-07	1.36e-05
isogroup35112	RuvB helicase (Fragment)	4e-53	2.2804	-2.44192	0.633972	-3.85178	0.000117264	0.00120284
isogroup35117	ALPK2 (Fragment)	3e-67	1.03478	2.90447	0.744589	3.90077	9.59e-05	0.00101786
isogroup35209	Chromosome 2 SCAF8387 whole genome shotgun sequence	2e-09	37.139	7.12566	0.616339	11.5613	6.47e-31	2.57e-28
isogroup3523	Aquaporin-8	3e-138	6.34129	-4.45271	0.543838	-8.18755	2.67e-16	2.61e-14
isogroup3525	RWD domain-containing protein 1	2e-114	23.3189	-2.10566	0.180514	-11.6648	1.93e-31	7.96e-29
isogroup3536	FAHD1	1e-149	15.0272	-1.13531	0.270206	-4.20165	2.65e-05	0.000338165
isogroup35422	Peroxisome proliferator-activated receptor beta	2e-18	2.3712	2.19806	0.575453	3.8197	0.000133613	0.00133423
isogroup3543	Peroxiredoxin-2	4e-133	37.6425	-1.16703	0.28123	-4.14973	3.33e-05	0.000411155
isogroup3546	Ectonucleoside triphosphate diphosphohydrolase 5	6e-62	4.92864	1.34661	0.343521	3.92003	8.85e-05	0.000951868
isogroup35493	Actin-related protein 2/3 complex subunit 5	3e-42	4.15462	-3.1231	0.559997	-5.577	2.45e-08	6.71e-07
isogroup3558	Thymidine kinase 2 mitochondrial	1e-158	2.17081	2.39656	0.56356	4.25254	2.11e-05	0.000278705
isogroup356	Transmembrane and immunoglobulin domain-containing protein 1	3e-28	12.3122	-4.2507	0.361621	-11.7546	6.69e-32	2.88e-29
isogroup357	Protein phosphatase 1 regulatory subunit 3C-B	2e-108	297.737	0.992654	0.263376	3.76896	0.000163928	0.00158296
isogroup3576	Multidrug and toxin extrusion protein	2e-85	1.13588	-3.18161	0.723543	-4.39727	1.1e-05	0.000156604
isogroup35766	Phosphoribosyl pyrophosphate synthase-associated protein 1	3e-35	1.03453	-2.09784	0.620675	-3.37994	0.000725021	0.00560483
isogroup35774	RNA-binding protein 42	2e-44	6.5147	1.03106	0.309365	3.33282	0.000859706	0.0064525
isogroup358	Iduronate 2-sulfatase	3e-179	1.15887	2.5794	0.745517	3.45988	0.000540412	0.00436923
isogroup35857	Putative methyltransferase	5e-43	30.34	2.08681	0.316412	6.59525	4.25e-11	1.99e-09
isogroup36	Proprotein convertase subtilisin/kexin type 6	1e-156	173.059	-0.591014	0.147831	-3.9979	6.39e-05	0.000722632
isogroup360	Prostamide/prostaglandin F synthase	2e-06	27.5113	0.815744	0.226805	3.59667	0.000322319	0.00281093
isogroup3602	Eukaryotic translation initiation factor 2 subunit 1	2e-06	48.5805	-1.44998	0.175258	-8.2734	1.3e-16	1.33e-14
isogroup3604	RT nLTR: Non-LTR (Long terminal repeat) retrotransposon and domain-containing protein (Fragment)	5e-42	11.8989	-2.90719	0.360725	-8.0593	7.67e-16	6.95e-14
isogroup36119	Complement C1q protein 2	8e-37	22.5365	-2.95229	0.478463	-6.17036	6.81e-10	2.59e-08
isogroup3617	Cytochrome c oxidase subunit 5B isoform 1	5e-80	240.451	-0.458288	0.120624	-3.79932	0.000145092	0.00143038
isogroup3619	Mediator of DNA-damage checkpoint 1 (Fragment)	3e-22	26.23	1.21799	0.228404	5.33258	9.68e-08	2.31e-06
isogroup363	N-acylethanolamine-hydrolyzing acid amidase	2e-138	21.4465	-1.04151	0.275223	-3.78424	0.000154179	0.00150228
isogroup36354	Complement C3	2e-54	1.34814	2.76581	0.656875	4.21056	2.55e-05	0.000327202
isogroup3647	C-type lectin domain family 10 member A	3e-158	383.371	-0.633159	0.169635	-3.73247	0.000189611	0.0017942
isogroup36479	NELFE	1e-79	4.7244	1.53233	0.420299	3.6458	0.000266561	0.00239175
isogroup366	D site of albumin promoter (Albumin D-box) binding protein	3e-13	63.2403	-2.62657	0.50051	-5.24778	1.54e-07	3.5e-06
isogroup36644	Alpha-mannosidase	6e-53	5.29985	4.85323	0.602756	8.05174	8.16e-16	7.35e-14
isogroup3674	Ubiquitin carboxyl-terminal hydrolase 30	2e-173	3.64524	-1.88243	0.452511	-4.15998	3.18e-05	0.000396465
isogroup36762	RNA-binding motif single-stranded-interacting protein 3	2e-18	4.55352	-1.68921	0.356037	-4.74448	2.09e-06	3.64e-05
isogroup3689	SENP2	7e-08	15.0898	-2.46934	0.420476	-5.87272	4.29e-09	1.37e-07
isogroup36962	Formin binding protein 1	2e-41	11.2656	-0.934382	0.282893	-3.30295	0.000956731	0.00703539
isogroup371	Reticulocalbin 3 EF-hand calcium binding domain	6e-178	150.089	2.04864	0.453716	4.51526	6.32e-06	9.76e-05
isogroup37168	Lectin C-type domain containing protein	2e-23	82.35	-6.62188	0.529915	-12.4961	7.84e-36	4.63e-33
isogroup3721	Lysozyme C	2e-38	2475.09	-1.40743	0.243906	-5.77036	7.91e-09	2.41e-07
isogroup3724	Mesoderm specific transcript	4e-08	1.09974	-3.24557	0.644826	-5.03325	4.82e-07	9.7e-06
isogroup37240	PPUP6782 (Fragment)	3e-12	1.73734	2.28599	0.578332	3.95273	7.73e-05	0.00084885
isogroup3735	F-actin-capping protein subunit beta	3e-180	37.5276	-1.8439	0.28637	-6.43885	1.2e-10	5.25e-09
isogroup3737	TCTP	4e-79	3514.34	0.830739	0.127628	6.50908	7.56e-11	3.41e-09
isogroup3738	DDRGK domain containing 1	4e-71	17.7708	-0.91676	0.175895	-5.21197	1.87e-07	4.16e-06
isogroup37420	Serine/threonine-protein phosphatase PGAM5 mitochondrial	8e-15	8.84002	0.911565	0.283288	3.2178	0.00129177	0.00901545
isogroup3743	Alanine--glyoxylate aminotransferase 2 mitochondrial	6e-26	1.92036	-3.2084	0.565168	-5.6769	1.37e-08	3.98e-07
isogroup3746	Nuclear export mediator factor Nemf	3e-64	12.1357	0.841256	0.221727	3.79411	0.000148173	0.00145553
isogroup3749	Apolipoprotein B-100	3e-175	7.39089	1.12805	0.350378	3.21953	0.00128401	0.0089692
isogroup375	Cytochrome P450 3A24	6e-176	104.674	-2.02989	0.259429	-7.82445	5.1e-15	4.11e-13
isogroup3764	Prostaglandin D synthase	3e-76	5137.05	-1.69581	0.185111	-9.16103	5.14e-20	7.42e-18
isogroup37647	U3 small nucleolar ribonucleoprotein protein MPP10	6e-19	3.5568	-2.03061	0.483043	-4.20379	2.62e-05	0.00033555
isogroup37673	Ataxin-7 protein 1	6e-11	8.56135	1.32753	0.356146	3.72749	0.000193396	0.00182144
isogroup3770	PPUP2763 (Fragment)	1e-48	16.0942	-0.808886	0.226752	-3.56728	0.000360711	0.0031009
isogroup3773	Butyrophilin subfamily 1 member A1	3e-12	1.39979	-2.45215	0.702627	-3.48997	0.000483074	0.00397926
isogroup37747	Probable phospholipid-transporting ATPase IA	3e-12	4.15397	-2.86555	0.461606	-6.20778	5.37e-10	2.08e-08
isogroup3790	DBNL (Fragment)	6e-112	40.3472	0.633982	0.169984	3.72966	0.000191739	0.00180809
isogroup37939	Cholinergic receptor muscarinic 2a (Fragment)	8e-53	5.00621	1.55524	0.457388	3.40025	0.000673231	0.00526744
isogroup37986	NADH-ubiquinone oxidoreductase chain 1	1e-38	10.0832	-2.85328	0.36469	-7.82384	5.12e-15	4.11e-13
isogroup3808	Erythromycin 3-O-methyltransferase	3e-10	40.2426	1.13519	0.20903	5.43076	5.61e-08	1.42e-06
isogroup3809	Pantothenate kinase 2	6e-88	6.7243	-1.31699	0.285395	-4.61463	3.94e-06	6.37e-05
isogroup381	Glucosamine 6-phosphate N-acetyltransferase	2e-92	32.2939	-1.02826	0.251613	-4.08666	4.38e-05	0.000521225
isogroup3814	Serine/arginine-rich splicing factor 10	3e-62	20.2593	1.09448	0.282989	3.86755	0.000109933	0.00113887
isogroup3825	PC4 and SFRS1 interacting protein 1	8e-118	8.72662	2.05186	0.401473	5.11084	3.21e-07	6.72e-06
isogroup383	Dehydrogenase/reductase SDR family member 13	4e-164	161.923	-2.41081	0.251589	-9.58231	9.49e-22	1.64e-19
isogroup3847	Rho GTPase-activating protein 25	3e-99	5.09954	-1.8587	0.410831	-4.52426	6.06e-06	9.39e-05
isogroup38536	Glyceronephosphate O-acyltransferase	6e-24	1.17262	-2.67771	0.597739	-4.47974	7.47e-06	0.000113085
isogroup3871	DnaJ domain-containing protein	8e-76	0.734365	-2.72961	0.797372	-3.42326	0.000618738	0.00490646
isogroup38828	Reverse transcriptase protein	2e-06	1.74126	-2.04943	0.62179	-3.29602	0.000980642	0.00717971
isogroup3884	ASC	4e-30	2.8159	-3.10405	0.495573	-6.26354	3.76e-10	1.51e-08
isogroup3885	Choriogenin Ha	4e-165	24917.3	7.37588	0.770387	9.57425	1.03e-21	1.75e-19
isogroup38877	Hydroxysteroid (11-beta) dehydrogenase 1 (Fragment)	3e-68	5.23273	3.28079	0.631552	5.1948	2.05e-07	4.52e-06
isogroup38883	Cytochrome c oxidase subunit 2	2e-37	12.1758	6.4901	0.576913	11.2497	2.32e-29	8.55e-27
isogroup38933	Retinol binding-protein 7	7e-42	1.99643	2.32236	0.54956	4.22585	2.38e-05	0.000309416
isogroup38957	Cathepsin H	3e-08	25.2941	1.28891	0.233669	5.51599	3.47e-08	9.2e-07
isogroup39062	Septin-4	4e-25	2.32258	2.1974	0.679695	3.23292	0.00122531	0.00864772
isogroup39074	Cytochrome c oxidase subunit 2	3e-38	12.5867	6.5321	0.577781	11.3055	1.23e-29	4.65e-27
isogroup39116	Sulfotransferase	1e-46	3.77101	3.48115	0.637484	5.46076	4.74e-08	1.23e-06
isogroup392	N-acetylmuramoyl-L-alanine amidase	2e-86	324.08	0.623501	0.190622	3.27088	0.00107215	0.00773697
isogroup394	Leiomodin-1	1e-178	16.4316	-3.16281	0.480573	-6.58133	4.66e-11	2.19e-09
isogroup39401	Alpha-2-macroglobulin	5e-49	13.078	2.32584	0.455814	5.10261	3.35e-07	6.99e-06
isogroup3953	Glutathione peroxidase	4e-121	113.899	-0.924071	0.221706	-4.168	3.07e-05	0.000384042
isogroup39739	Tripartite motif-containing protein 35	6e-12	3.17261	3.80179	0.612372	6.2083	5.36e-10	2.08e-08
isogroup39741	Cytochrome c oxidase subunit 2	8e-38	11.515	6.69566	0.574553	11.6537	2.2e-31	8.96e-29
isogroup39814	SPRY domain-containing protein 7	2e-48	1.08542	2.69828	0.707894	3.8117	0.000138013	0.00137316
isogroup3987	Beta-ureidopropionase	2e-69	127.79	3.28102	0.342221	9.58742	9.03e-22	1.57e-19
isogroup39874	Interferon regulatory factor 9 (Fragment)	2e-33	4.52327	1.72152	0.383244	4.49197	7.06e-06	0.000107315
isogroup399	Acyl-CoA dehydrogenase family member 11	2e-142	149.535	0.683393	0.212414	3.21726	0.00129419	0.00903031
isogroup3990	Protein canopy-1	3e-78	26.083	-1.80512	0.309105	-5.83984	5.22e-09	1.64e-07
isogroup40	Ankyrin repeat domain-containing protein 11	8e-55	1331.22	0.915183	0.279162	3.27832	0.00104428	0.00756845
isogroup40157	Mitofusin-2	5e-33	10.6242	2.00794	0.339379	5.91651	3.29e-09	1.08e-07
isogroup4016	Nuclear factor interleukin-3-regulated protein	1e-25	7.79792	-2.52279	0.47003	-5.36729	7.99e-08	1.94e-06
isogroup4021	ATP synthase subunit a	1e-70	1210.37	-5.52467	0.257069	-21.491	1.89e-102	9.5e-99
isogroup40261	HGFL (Fragment)	4e-15	22.7778	-0.956294	0.264944	-3.60942	0.00030688	0.00269185
isogroup4032	CutA divalent cation tolerance homolog	3e-99	19.2308	-0.746997	0.182366	-4.09615	4.2e-05	0.000503118
isogroup4034	Corepressor interacting with RBPJ 1	2e-30	9.20283	0.847452	0.244704	3.46317	0.00053385	0.00432312
isogroup4035	Solute carrier family 27 member 2	4e-114	38.1909	-4.1348	0.438935	-9.42008	4.51e-21	7.23e-19
isogroup40388	LITD1	8e-29	1.61649	-1.82937	0.522996	-3.49787	0.000468989	0.00387807
isogroup404	RNA polymerase-associated protein Rtf1	1e-77	41.2367	0.672627	0.190748	3.52626	0.000421469	0.00355134
isogroup4042	Mus7/MMS22 family domain-containing protein	2e-12	52.1523	0.553034	0.171224	3.22988	0.0012384	0.00871565
isogroup4043	Ca2+-dependent complex c1r/c1S subunit (Fragment)	9e-103	22.7077	3.29065	0.780156	4.21794	2.47e-05	0.000318282
isogroup40467	Erythrocyte membrane protein band 4.1b (Elliptocytosis 1 RH-linked) (Fragment)	3e-10	2.75134	2.44852	0.552397	4.43254	9.31e-06	0.000136269
isogroup405	Serum paraoxonase/arylesterase 2	3e-127	100.474	-1.91459	0.140535	-13.6236	2.9e-42	2.65e-39
isogroup40508	Sacsin	1e-20	33.041	-5.92952	0.687093	-8.62986	6.14e-18	7.21e-16
isogroup4051	Polycomb group ring finger 5	5e-96	17.6706	1.46321	0.293794	4.9804	6.35e-07	1.25e-05
isogroup406	Acyl-coenzyme A thioesterase 4	3e-33	4.17428	-2.25305	0.366656	-6.14487	8e-10	3e-08
isogroup4064	Reverse transcriptase protein (Fragment)	6e-17	2.73439	-4.64355	0.583208	-7.96208	1.69e-15	1.45e-13
isogroup4076	Ig heavy chain V-III region VH26	1e-52	1.75148	2.39329	0.584962	4.09136	4.29e-05	0.00051219
isogroup40765	Activator of heat shock protein ATPase	2e-38	2.25371	-2.82551	0.543665	-5.19714	2.02e-07	4.46e-06
isogroup40811	Glycolipid transfer protein domain-containing protein 1	1e-22	2.08408	4.16372	0.707512	5.88502	3.98e-09	1.29e-07
isogroup4083	Large neutral amino acids transporter small subunit 3	3e-108	10.8581	-1.76459	0.31004	-5.69149	1.26e-08	3.68e-07
isogroup40923	Claudin 3b (Fragment)	1e-36	44.1096	-0.647754	0.20221	-3.20337	0.00135827	0.009397
isogroup4094	Small ubiquitin-related modifier 2	2e-59	21.091	0.604297	0.171263	3.52848	0.000417957	0.0035255
isogroup40947	Myosin-11 protein (Fragment)	3e-09	3.83699	2.57722	0.522822	4.92944	8.25e-07	1.58e-05
isogroup4105	Corepressor interacting with RBPJ 1	3e-121	12.9228	1.16833	0.27906	4.18667	2.83e-05	0.000357493
isogroup41066	Cartilage acidic protein 2	2e-08	0.977938	-2.54167	0.694615	-3.6591	0.000253099	0.00229004
isogroup4117	Apolipoprotein C-II	7e-36	573.747	-0.554462	0.139713	-3.96859	7.23e-05	0.000805925
isogroup4125	Collagen alpha-1XIII chain	1e-42	134.493	1.41722	0.35764	3.96272	7.41e-05	0.00082071
isogroup41559	PTN6 (Fragment)	9e-52	6.10721	1.5583	0.410457	3.79649	0.000146758	0.0014435
isogroup41615	Alpha amylase (Fragment)	8e-69	3.91453	4.99934	0.609771	8.19872	2.43e-16	2.39e-14
isogroup41616	Alpha-amylase	7e-54	591.331	1.45351	0.344419	4.22019	2.44e-05	0.000315667
isogroup41644	Merlin	7e-21	48.3605	2.87716	0.454696	6.32765	2.49e-10	1.03e-08
isogroup41645	Merlin	3e-22	76.5103	4.50083	0.511226	8.80399	1.32e-18	1.65e-16
isogroup41668	Rho GTPase-activating protein 12	6e-19	3.23143	-2.19195	0.546289	-4.01243	6.01e-05	0.000685711
isogroup417	Asparaginase homolog	2e-165	34.7408	-3.53447	0.259574	-13.6164	3.2e-42	2.76e-39
isogroup41712	NF7B (Fragment)	1e-29	28.4311	2.21233	0.4244	5.21284	1.86e-07	4.15e-06
isogroup41723	PPUP3880	6e-41	8.79334	3.25241	0.535173	6.07731	1.22e-09	4.45e-08
isogroup41786	Transmembrane protein 30Ab (Fragment)	7e-54	1.94924	-2.16992	0.47107	-4.60637	4.1e-06	6.59e-05
isogroup4203	MRP4	7e-29	11.7551	-1.41207	0.335365	-4.21054	2.55e-05	0.000327202
isogroup4211	Zinc finger protein 318 (Fragment)	5e-06	12.4228	1.27163	0.262492	4.84446	1.27e-06	2.33e-05
isogroup4224	PNGF (Fragment)	7e-72	34.944	0.605074	0.187486	3.2273	0.00124965	0.00877637
isogroup42260	GTPase IMAP family member 8	4e-60	7.82489	1.78449	0.452457	3.94399	8.01e-05	0.000877203
isogroup4233	Vesicle-associated membrane protein 1 (Fragment)	4e-47	3.58989	-1.47047	0.387523	-3.79455	0.000147913	0.00145392
isogroup42400	Ubiquitin 5 protein (Fragment)	1e-37	14.6378	-1.02388	0.308366	-3.32034	0.000899081	0.00670299
isogroup4241	PIN2/TERF1-interacting telomerase inhibitor 1	7e-16	18.463	-1.04447	0.268703	-3.88708	0.000101459	0.00106498
isogroup42430	Dsc2l protein (Fragment)	9e-11	3.66806	-1.32277	0.405804	-3.25963	0.00111556	0.00799567
isogroup4248	Chromosome 2 SCAF8387 whole genome shotgun sequence	7e-15	22.821	-2.81691	0.777693	-3.62214	0.000292178	0.00257488
isogroup425	Biogenesis of lysosome-related organelles complex 1 subunit 6	8e-67	20.3002	-0.767065	0.180954	-4.239	2.25e-05	0.000293807
isogroup4267	Alpha-enolase	6e-126	13.1294	-1.41651	0.349091	-4.0577	4.96e-05	0.000581084
isogroup42700	Pol polyprotein	1e-30	1.06095	-3.54025	0.704738	-5.0235	5.07e-07	1.02e-05
isogroup42747	Amino acid transporter	1e-10	6.36437	-1.65192	0.379407	-4.35395	1.34e-05	0.000185639
isogroup4286	Nocturnin	5e-44	2.46181	-3.4967	0.919919	-3.80109	0.000144059	0.0014258
isogroup42926	Complement factor H-related protein 1	2e-41	1.65313	-2.70593	0.564422	-4.79416	1.63e-06	2.92e-05
isogroup430	PPUP1244	2e-20	46.7322	-1.07751	0.288849	-3.73036	0.000191203	0.00180416
isogroup43018	Serum lectin isoform 3	4e-18	595.759	8.78265	0.389984	22.5205	2.61e-112	1.58e-108
isogroup4315	RNA-binding protein 25	3e-91	29.7317	1.08934	0.228499	4.76737	1.87e-06	3.29e-05
isogroup43365	Metabotropic glutamate receptor 1	7e-10	11.789	-2.02131	0.39727	-5.088	3.62e-07	7.5e-06
isogroup43400	Murinoglobulin-2	7e-54	3.09703	-3.09488	0.56537	-5.47408	4.4e-08	1.15e-06
isogroup43433	E3 ubiquitin-protein ligase TRIM39 (Fragment)	6e-18	5.24016	1.90518	0.401788	4.74174	2.12e-06	3.68e-05
isogroup4358	Protein tyrosine phosphatase type IVA 2	3e-55	3.36048	-2.01816	0.525778	-3.83842	0.000123829	0.00125481
isogroup4366	Aminopeptidase NPEPL1 putative	2e-48	21.9301	-1.9189	0.188217	-10.1951	2.08e-24	5.03e-22
isogroup437	Lamin-A	5e-116	14.8166	-1.47068	0.353864	-4.15606	3.24e-05	0.000402161
isogroup4372	Serum amyloid A protein	1e-44	2.48042	-1.99569	0.565171	-3.53113	0.000413791	0.00349739
isogroup43766	Acid sphingomyelinase phosphodiesterase 3a protein	2e-45	5.66341	-1.6533	0.399636	-4.13702	3.52e-05	0.000430444
isogroup4377	H/ACA ribonucleoprotein complex subunit 4	1e-178	41.58	-2.20267	0.383519	-5.7433	9.28e-09	2.79e-07
isogroup438	Protoporphyrinogen oxidase	2e-133	12.5421	-1.25303	0.226017	-5.54395	2.96e-08	7.96e-07
isogroup43821	ATP synthase subunit a (Fragment)	7e-34	1182.93	8.05374	0.311606	25.8459	2.71e-147	8.16e-143
isogroup4388	ER membrane protein complex subunit 6	4e-26	3.88679	-1.3893	0.434208	-3.19961	0.00137612	0.00949211
isogroup4391	Ethanolamine-phosphate cytidylyltransferase protein	2e-14	6.93976	-1.53587	0.367265	-4.18192	2.89e-05	0.000363977
isogroup44	Nucleobindin-2	4e-141	24.5118	-1.22208	0.224951	-5.43266	5.55e-08	1.41e-06
isogroup4405	Upf0249 protein ydjc homolog	3e-77	2.17269	-2.5148	0.620216	-4.05472	5.02e-05	0.000587627
isogroup4413	Peroxiredoxin-6	1e-148	1293.44	0.700959	0.15441	4.5396	5.64e-06	8.79e-05
isogroup4415	Putative tRNA (cytidine(32)/guanosine(34)-2-O)-methyltransferase	1e-106	8.48397	1.86847	0.30379	6.15053	7.72e-10	2.9e-08
isogroup4422	Inhibitor of DNA binding 4	9e-75	5.02359	1.57167	0.413546	3.80048	0.000144418	0.00142777
isogroup4423	Lactoylglutathione lyase	9e-123	54.4318	-0.685758	0.186542	-3.67615	0.000236783	0.00216408
isogroup4428	Pyridine nucleotide-disulfide oxidoreductase domain-containing protein 2	5e-163	10.5816	-2.17953	0.484469	-4.49881	6.83e-06	0.000104395
isogroup4429	Putative nuclease HARBI1 (Fragment)	7e-20	3.32263	-3.62579	0.532503	-6.80897	9.83e-12	5.07e-10
isogroup443	Beta-microseminoprotein (Fragment)	1e-28	253.987	-1.65265	0.285344	-5.79178	6.96e-09	2.14e-07
isogroup4438	NADPH--cytochrome P450 reductase	2e-148	28.7239	-3.22155	0.425805	-7.5658	3.85e-14	2.79e-12
isogroup44385	Sarcosine dehydrogenase (Fragment)	4e-20	4.596	1.83477	0.430782	4.25916	2.05e-05	0.000271295
isogroup448	Sulfotransferase	9e-85	542.47	1.06802	0.162864	6.55772	5.46e-11	2.52e-09
isogroup4482	Cystathionine beta-synthase (Fragment)	3e-16	298.196	-1.12049	0.268641	-4.17097	3.03e-05	0.000380367
isogroup450	EMILIN-1 (Fragment)	3e-89	11.0939	-1.03845	0.240749	-4.31341	1.61e-05	0.000219062
isogroup45213	GTPase IMAP family member 4	5e-06	6.77852	1.66146	0.366789	4.52975	5.91e-06	9.18e-05
isogroup45312	Histone H2AX	1e-46	4.21334	3.46102	0.717235	4.82551	1.4e-06	2.54e-05
isogroup454	Leucine-rich repeat-containing protein 17	3e-109	20.2545	-1.69773	0.38518	-4.40761	1.05e-05	0.000150378
isogroup45490	Merlin	5e-39	27.9452	6.05631	0.620002	9.7682	1.54e-22	2.95e-20
isogroup45553	Dehydrogenase/reductase SDR family member 11	1e-42	19.635	4.20447	0.395252	10.6374	2e-26	5.79e-24
isogroup4557	Cytochrome b-c1 complex subunit 1 mitochondrial	2e-95	19.13	-1.17269	0.267121	-4.3901	1.13e-05	0.000161473
isogroup457	Membrane-spanning 4-domains subfamily A member 4A	1e-82	60.649	-1.03676	0.295503	-3.50847	0.000450692	0.00374732
isogroup45827	Complement component c3	2e-36	1.45239	-1.99121	0.509585	-3.90751	9.33e-05	0.000995985
isogroup4586	Protein disulfide-isomerase	6e-133	195.233	-1.45751	0.238156	-6.11999	9.36e-10	3.47e-08
isogroup4587	T-complex protein 1 subunit theta	3e-159	31.5602	-0.745212	0.226591	-3.28879	0.00100618	0.00733108
isogroup45976	Protein cordon-bleu	1e-20	1.4066	2.40549	0.673819	3.56993	0.000357071	0.00307136
isogroup46	Putative glycerophosphocholine phosphodiesterase GPCPD1 homolog 1	1e-75	86.2891	-1.58194	0.284721	-5.55609	2.76e-08	7.45e-07
isogroup4600	Keratinocyte-associated protein 2	6e-65	46.1421	-0.997363	0.275753	-3.61687	0.000298189	0.00262248
isogroup4607	Cytochrome b-c1 complex subunit 6 mitochondrial	1e-34	40.5643	0.444961	0.133081	3.34353	0.000827198	0.00625052
isogroup4608	Chromosome 9 SCAF14991 whole genome shotgun sequence (Fragment)	2e-160	2.94056	-3.87299	0.579902	-6.6787	2.41e-11	1.16e-09
isogroup46198	Apolipoprotein C-I	3e-08	4527.59	-0.859731	0.200928	-4.2788	1.88e-05	0.000250407
isogroup4624	Chromosome 2 SCAF8387 whole genome shotgun sequence	6e-15	658.616	-0.847538	0.218509	-3.87874	0.000104998	0.00109485
isogroup4634	Osmotic stress transcription factor 1	1e-40	9.33745	-1.52588	0.346228	-4.40716	1.05e-05	0.00015062
isogroup46395	Zinc-binding protein A33	4e-49	2.38197	2.0641	0.626191	3.29628	0.000979747	0.00717543
isogroup464	Family with sequence similarity 3 member C	1e-17	17.8465	-2.82832	0.257745	-10.9734	5.13e-28	1.74e-25
isogroup46408	Alpha-1-antitrypsin	2e-17	1116.97	-0.902236	0.229027	-3.93942	8.17e-05	0.000891161
isogroup4654	Transcription factor GATA-4	2e-103	4.11835	-1.83086	0.487874	-3.75274	0.00017491	0.00167346
isogroup4656	Mortality factor 4 protein 1	2e-112	12.7896	1.15733	0.258092	4.48419	7.32e-06	0.00011103
isogroup466	Phosphatidic acid phosphatase type 2A	1e-150	6.26042	-2.78334	0.467114	-5.95859	2.54e-09	8.58e-08
isogroup4666	Amino acid transporter	3e-53	0.801137	-2.47495	0.713295	-3.46975	0.000520948	0.00423685
isogroup4679	M-phase phosphoprotein 8	1e-24	44.0153	0.960439	0.177744	5.40349	6.54e-08	1.62e-06
isogroup46815	Stress-associated endoplasmic reticulum protein 1	7e-27	5.53012	1.16018	0.34171	3.39524	0.000685696	0.00534467
isogroup46889	GTP-binding protein A	3e-52	2.11767	2.60587	0.628807	4.14415	3.41e-05	0.000419657
isogroup4692	Flightless I homolog	7e-141	6.13047	-1.38151	0.264432	-5.22443	1.75e-07	3.92e-06
isogroup4694	Sodium-coupled neutral amino acid transporter 2	6e-07	5.13994	-1.62034	0.465938	-3.47758	0.000505969	0.00413622
isogroup46966	Chromosome 7 open reading frame 25 (Fragment)	3e-36	3.26986	1.47762	0.450671	3.27872	0.0010428	0.00756322
isogroup4698	Interleukin-8	5e-51	35.5297	0.829072	0.242381	3.42053	0.000624997	0.00494959
isogroup471	Vesicle-associated membrane protein 8	4e-39	23.8278	-0.781605	0.212332	-3.68105	0.000232272	0.00212906
isogroup472	Torsin-3A	3e-122	9.63743	-3.37688	0.660487	-5.11271	3.18e-07	6.66e-06
isogroup47200	TMLH (Fragment)	6e-49	1.33629	1.86468	0.583663	3.19478	0.00139937	0.00962168
isogroup47227	GAS6	4e-31	4.29418	-4.428	0.54187	-8.17169	3.04e-16	2.95e-14
isogroup473	UDP-glucuronosyltransferase 2B4	3e-127	164.975	2.44302	0.391658	6.23763	4.44e-10	1.75e-08
isogroup4733	Pleckstrin domain-containing family F member 1	5e-39	8.01602	3.38676	0.482805	7.01477	2.3e-12	1.31e-10
isogroup4737	Krueppel factor 4	6e-41	16.8487	-5.50021	0.43222	-12.7255	4.27e-37	2.8e-34
isogroup4742	Retinol dehydrogenase 13	5e-52	3.43988	2.20823	0.499986	4.41657	1e-05	0.000145109
isogroup4749	Teneurin-3	2e-52	19.024	-4.61891	0.315608	-14.6349	1.68e-48	2.11e-45
isogroup475	Polymerase (RNA) III (DNA directed) polypeptide G	5e-72	18.9001	-1.06234	0.331209	-3.20745	0.00133917	0.00929041
isogroup47529	Zinc transporter ZIP9	5e-06	10.8495	-2.55789	0.272514	-9.38629	6.22e-21	9.81e-19
isogroup4759	Ras-related protein Rap-1b	7e-112	3.42979	-2.38679	0.428022	-5.57632	2.46e-08	6.72e-07
isogroup476	Phosphatidate phosphatase LPIN2	6e-107	3.1922	-1.46972	0.434784	-3.38034	0.000723972	0.00559816
isogroup47630	GTPase IMAP family member 4	9e-43	29.3476	1.08324	0.33934	3.19221	0.00141189	0.00969676
isogroup4764	Protocadherin Fat 1	6e-45	14.7052	-1.03764	0.233289	-4.44785	8.67e-06	0.000128345
isogroup4771	LGP2	1e-54	10.7594	2.31549	0.523586	4.42238	9.76e-06	0.000141741
isogroup47754	Merlin	3e-17	15.6916	2.01661	0.501753	4.01912	5.84e-05	0.000669815
isogroup47871	Cytochrome P450 2J2	9e-27	4.93579	-2.88377	0.445442	-6.47395	9.55e-11	4.23e-09
isogroup48	Receptor expression-enhancing protein (Fragment)	6e-119	26.2181	-0.840393	0.194863	-4.31274	1.61e-05	0.000219536
isogroup4815	Pyruvate kinase	1e-121	25.0721	0.789055	0.245589	3.21291	0.00131399	0.00913886
isogroup48155	Intelectin-1a	4e-31	352.172	7.09477	0.297574	23.8421	1.22e-125	1.23e-121
isogroup4821	Complement factor H (Fragment)	5e-17	20.1582	2.0398	0.450664	4.52621	6.01e-06	9.31e-05
isogroup48228	Serine/arginine-rich splicing factor 3 (Fragment)	1e-07	4.36611	3.06869	0.506222	6.06196	1.34e-09	4.85e-08
isogroup483	7-alpha-hydroxycholest-4-en-3-one 12-alpha-hydroxylase	6e-167	159.733	-6.62295	0.260653	-25.409	2e-142	3.02e-138
isogroup4842	NAD kinase	3e-126	10.2985	-1.93977	0.53666	-3.61452	0.000300904	0.00264327
isogroup4850	Tectonic-3	3e-154	5.07847	-1.97225	0.477191	-4.13304	3.58e-05	0.000437021
isogroup48589	Calcium-binding and coiled-coil domain-containing protein 1	7e-23	15.3566	1.13303	0.246631	4.59402	4.35e-06	6.97e-05
isogroup4863	Ran guanine nucleotide release factor	3e-109	5.26572	-1.43343	0.36022	-3.97931	6.91e-05	0.000774269
isogroup4868	Selenoprotein H	4e-24	8.09462	-0.898621	0.273603	-3.2844	0.001022	0.00743377
isogroup4882	Chromosome 9 SCAF15033 whole genome shotgun sequence	2e-27	8.44231	-6.7118	0.492926	-13.6162	3.21e-42	2.76e-39
isogroup48919	Cytosolic sulfotransferase 1	2e-09	5.81537	-2.26168	0.45988	-4.91797	8.74e-07	1.66e-05
isogroup48929	Niemann-Pick C1 protein 1	1e-25	4.31914	4.56747	0.589425	7.74902	9.26e-15	7.05e-13
isogroup4896	Ribonuclease P protein subunit p40	7e-139	3.95549	-1.27803	0.351701	-3.63385	0.000279226	0.00248395
isogroup49	Proline synthetase co-transcribed homolog (Bacterial)	1e-164	23.0792	-0.776827	0.186457	-4.16625	3.1e-05	0.000386674
isogroup4904	Kelch ECH-associated protein 1a (Fragment)	3e-62	9.93233	-1.18663	0.288293	-4.11607	3.85e-05	0.00046657
isogroup4908	C-factor	4e-142	4.62904	-1.67798	0.424646	-3.95147	7.77e-05	0.000852701
isogroup492	Histamine N-methyltransferase	8e-36	23.3186	-4.72518	0.486212	-9.71834	2.52e-22	4.66e-20
isogroup49360	Abhydrolase domain containing 12B	2e-34	2.51347	3.51769	0.626498	5.61485	1.97e-08	5.54e-07
isogroup4969	ADP-ribosylation factor protein 4C	3e-15	27.7533	1.21938	0.274619	4.44024	8.99e-06	0.00013225
isogroup497	Bcl-2-related ovarian killer protein	7e-88	1.29802	-3.03615	0.650251	-4.6692	3.02e-06	5.03e-05
isogroup4981	Transmembrane protein 14C	7e-45	184.794	1.22574	0.304832	4.02105	5.79e-05	0.000665121
isogroup4988	Retinoic acid receptor responder 3	5e-39	1.46513	-2.14495	0.544724	-3.93768	8.23e-05	0.000896681
isogroup49978	Glycerophosphodiester phosphodiesterase domain-containing protein 1	9e-31	2.13284	3.28748	0.677238	4.85424	1.21e-06	2.23e-05
isogroup4998	Transmembrane protein 258 (Fragment)	3e-35	211.781	-0.640187	0.160467	-3.98953	6.62e-05	0.000744976
isogroup5	Fatty acyl-CoA hydrolase precursor medium chain	6e-164	876.326	-0.61105	0.144628	-4.22496	2.39e-05	0.000310376
isogroup500	Guanine nucleotide-binding protein 3	2e-154	16.5757	-1.36199	0.250967	-5.42697	5.73e-08	1.45e-06
isogroup50039	GTPase IMAP family member 4	4e-35	1.79202	2.79197	0.605469	4.61124	4e-06	6.47e-05
isogroup50080	Protein quaking-A	4e-14	5.24677	1.22873	0.330575	3.71694	0.000201647	0.00188735
isogroup5014	Ubiquitin carboxyl-terminal hydrolase protein	1e-31	8.3301	-1.87244	0.420197	-4.4561	8.35e-06	0.000124114
isogroup50190	Heterogeneous nuclear ribonucleoprotein K	1e-14	2.23571	-2.04682	0.619341	-3.30484	0.000950308	0.00700182
isogroup50259	Protein kinase C and casein kinase substrate in neurons 3	1e-11	7.3568	1.19475	0.316665	3.77292	0.00016135	0.00156257
isogroup5033	Hepcidin (Fragment)	2e-48	3532.58	-2.23273	0.408525	-5.46535	4.62e-08	1.2e-06
isogroup50357	Family with sequence similarity 65 member A	3e-53	5.052	1.49416	0.402122	3.7157	0.000202645	0.00189515
isogroup5042	Protein NLRC3	6e-51	0.878277	-2.55304	0.762367	-3.34883	0.00081153	0.00615216
isogroup50478	Antizyme inhibitor 1b	8e-28	2.23356	2.43261	0.70781	3.43681	0.000588602	0.00470959
isogroup5054	Gamma-glutamylcyclotransferase (Fragment)	2e-39	5.62985	1.41993	0.30903	4.5948	4.33e-06	6.95e-05
isogroup506	Protein lifeguard 4	5e-129	22.2248	-1.21791	0.162293	-7.50436	6.17e-14	4.33e-12
isogroup5069	Cytochrome P450 family 26 subfamily C polypeptide 1	1e-40	582.113	-4.21362	0.590228	-7.13897	9.4e-13	5.63e-11
isogroup50693	G1/S-specific cyclin-D2	3e-45	1.56741	2.68639	0.771766	3.48083	0.000499865	0.00409187
isogroup5073	S23A2	4e-26	2.9276	-4.05504	0.687484	-5.89838	3.67e-09	1.2e-07
isogroup5077	Butyrophilin subfamily 1 member A1	2e-58	4.44229	1.46729	0.448847	3.26902	0.00107922	0.00777707
isogroup5088	Teneurin-3	5e-55	5.66975	-2.1737	0.334139	-6.50538	7.75e-11	3.48e-09
isogroup51014	NLRC3	1e-11	1.34702	2.55135	0.705281	3.6175	0.000297467	0.00261689
isogroup5104	Tetratricopeptide repeat protein 31	3e-33	23.455	0.841097	0.206646	4.07024	4.7e-05	0.000554117
isogroup511	Arylsulfatase G	4e-93	31.6029	0.935983	0.189444	4.94068	7.79e-07	1.5e-05
isogroup51243	CD302 antigen	7e-25	3.04238	-2.68771	0.613442	-4.38135	1.18e-05	0.000166796
isogroup51259	Murinoglobulin-2	1e-10	23.9874	-1.7716	0.316719	-5.59358	2.22e-08	6.15e-07
isogroup5135	DCN1 protein 1	7e-173	3.24703	1.94573	0.466679	4.1693	3.06e-05	0.000382323
isogroup514	Agmatinase mitochondrial	2e-162	51.6937	-1.06822	0.194914	-5.48047	4.24e-08	1.11e-06
isogroup5144	[Pyruvate dehydrogenase [lipoamide]] kinase isozyme 2 mitochondrial	4e-92	3.90292	-2.64138	0.688412	-3.83693	0.000124584	0.00126076
isogroup5161	EPM2A (Fragment)	5e-42	11.3371	-2.35768	0.297441	-7.92655	2.25e-15	1.9e-13
isogroup517	Organic solute transporter subunit alpha	4e-158	509.682	-1.89082	0.251264	-7.52522	5.26e-14	3.73e-12
isogroup51716	DDT4L	4e-08	2.90881	-3.3069	0.71741	-4.60949	4.04e-06	6.51e-05
isogroup51807	UDP-glucuronosyltransferase	4e-26	5.91611	4.42524	0.617354	7.16808	7.61e-13	4.61e-11
isogroup5182	LIN1	7e-75	0.983099	-3.34755	0.729048	-4.59167	4.4e-06	7.04e-05
isogroup51846	Myeloid-associated differentiation marker	5e-24	2.54242	2.48954	0.600907	4.14298	3.43e-05	0.000421122
isogroup51862	RNA-directed DNA polymerase from mobile element jockey	3e-10	2.18031	-3.44781	0.741296	-4.65106	3.3e-06	5.43e-05
isogroup5189	Integral membrane protein 2B	2e-24	19.5285	3.65181	0.36408	10.0302	1.12e-23	2.49e-21
isogroup5195	KCC2D	4e-95	46.4651	-1.63394	0.21134	-7.73131	1.06e-14	8e-13
isogroup52	Chromosome 1 open reading frame 51	4e-113	20.274	-3.56297	0.790898	-4.50497	6.64e-06	0.000101804
isogroup52047	Chromosome 20 SCAF14744 whole genome shotgun sequence	1e-14	4.07221	4.42699	0.619325	7.14808	8.8e-13	5.3e-11
isogroup52194	Adherens junctions associated protein 1	2e-47	0.999882	-2.4573	0.665925	-3.69006	0.000224205	0.00206139
isogroup524	Putative L-aspartate dehydrogenase	1e-160	81.8344	-0.459817	0.131653	-3.49264	0.000478274	0.00394511
isogroup52429	Sulfotransferase	1e-10	1.50968	-1.7571	0.50056	-3.51027	0.000447655	0.00372721
isogroup5244	FAD synthase (Fragment)	5e-18	1.04155	-2.20155	0.632384	-3.48135	0.000498899	0.00408507
isogroup5254	Transmembrane protease serine 2	3e-93	11.1693	-1.97354	0.364079	-5.42063	5.94e-08	1.49e-06
isogroup52551	Nuclear pore complex protein Nup133	1e-14	2.10437	-1.57983	0.446867	-3.53534	0.000407245	0.00344593
isogroup52668	PiggyBac transposable element-derived protein 3	6e-15	1.95692	-2.84888	0.567717	-5.01813	5.22e-07	1.04e-05
isogroup52706	Complement component c3 (Fragment)	1e-14	2.79175	2.41103	0.69586	3.46482	0.000530578	0.00430182
isogroup528	Carnitine O-octanoyltransferase	6e-172	7.84212	1.62483	0.445279	3.64901	0.000263255	0.00236773
isogroup5304	Alpha-1-antitrypsin	7e-54	34283.7	-1.19232	0.209464	-5.69225	1.25e-08	3.66e-07
isogroup532	Biotinidase	5e-148	93.7666	-2.69497	0.215708	-12.4936	8.1e-36	4.69e-33
isogroup53236	Complement C3	3e-39	9.29431	-2.51608	0.481377	-5.22685	1.72e-07	3.88e-06
isogroup5324	COMM domain-containing protein 7	7e-95	5.37342	-1.18917	0.320921	-3.70549	0.000210979	0.00196131
isogroup534	CD48 antigen	5e-33	30.0013	-2.28462	0.256593	-8.9037	5.4e-19	7.18e-17
isogroup538	Triple QxxK/R motif-containing protein (Fragment)	4e-45	18.2128	2.44445	0.364092	6.71381	1.9e-11	9.22e-10
isogroup5386	Beta-crystallin S	5e-112	1.35088	-2.91849	0.800399	-3.64629	0.000266052	0.00238932
isogroup539	Chromosome 7 SCAF14650 whole genome shotgun sequence	7e-122	17.5922	-1.40152	0.359025	-3.90369	9.47e-05	0.00100955
isogroup5393	Transposable element Tcb1 transposase	1e-16	54.8148	-7.18925	0.419656	-17.1313	8.67e-66	1.87e-62
isogroup5420	Microfibril-associated 4 (Fragment)	6e-121	97.8801	-2.12372	0.573672	-3.70198	0.000213922	0.00198073
isogroup5447	Presequence protease mitochondrial	2e-24	1.66268	-3.09155	0.586712	-5.26928	1.37e-07	3.16e-06
isogroup54810	Nuclear receptor subfamily 1 group H member 5 (Fragment)	2e-33	0.971865	-3.35757	0.743244	-4.51745	6.26e-06	9.68e-05
isogroup54811	Nuclear receptor subfamily 1 group H member 5 (Fragment)	1e-33	2.85527	3.80788	0.681482	5.58765	2.3e-08	6.33e-07
isogroup54864	PPUP2988 (Fragment)	3e-19	1.55177	3.52727	0.664752	5.30615	1.12e-07	2.63e-06
isogroup5487	M10B1 (Fragment)	1e-148	1.54192	2.78166	0.763722	3.64224	0.000270277	0.00241934
isogroup54897	Insulin-induced gene protein	6e-44	6.90626	-2.57033	0.508629	-5.05344	4.34e-07	8.86e-06
isogroup5496	Forkhead box protein L1	6e-35	19.383	0.995186	0.247409	4.02243	5.76e-05	0.000662233
isogroup5502	FCF1 small subunit (SSU) processome component homolog	4e-125	22.6916	-1.22463	0.297856	-4.11147	3.93e-05	0.000475201
isogroup551	COX assembly mitochondrial protein 2 homolog	8e-31	25.2399	1.16925	0.176742	6.61555	3.7e-11	1.75e-09
isogroup5511	Chromosome 15 SCAF14556 whole genome shotgun sequence	8e-49	4.55401	-1.49353	0.368086	-4.05756	4.96e-05	0.000581194
isogroup5514	Putative ATP-dependent RNA helicase DDX27	3e-75	5.03982	-2.55587	0.480537	-5.31879	1.04e-07	2.48e-06
isogroup5523	LYR motif-containing protein 5 (Fragment)	6e-46	148.888	-0.55765	0.121758	-4.57997	4.65e-06	7.4e-05
isogroup553	Chromosome 21 SCAF15022 whole genome shotgun sequence	5e-23	3168	-0.616036	0.18129	-3.39807	0.000678619	0.00530006
isogroup5539	Complement C3	1e-119	28.5322	1.03801	0.260461	3.98526	6.74e-05	0.000756799
isogroup5541	Si:ch211-193k19.2	2e-80	3.7219	-5.45479	0.567846	-9.60611	7.53e-22	1.32e-19
isogroup5559	Microfibrillar-associated protein 4 type I	3e-116	1204.52	-2.44777	0.365557	-6.69602	2.14e-11	1.04e-09
isogroup556	Eukaryotic translation initiation factor 1A X-chromosomal	4e-60	26.9248	-1.28715	0.22829	-5.63823	1.72e-08	4.91e-07
isogroup5598	Chromosome 18 SCAF15030 whole genome shotgun sequence	7e-60	11.8221	-1.12345	0.330254	-3.40178	0.000669487	0.00524408
isogroup562	RDH2 (Fragment)	1e-89	102.843	1.45475	0.207804	7.00058	2.55e-12	1.44e-10
isogroup56316	Inositol monophosphatase 1	6e-24	2.26586	-3.07173	0.506878	-6.06009	1.36e-09	4.88e-08
isogroup564	Indoleamine 23-dioxygenase 2	4e-147	167.376	0.739972	0.195089	3.793	0.000148836	0.00146109
isogroup565	Protein lifeguard 1	3e-107	59.1508	-1.10531	0.221679	-4.98608	6.16e-07	1.21e-05
isogroup56598	TCP11	2e-09	2.12518	-1.90268	0.459024	-4.14506	3.4e-05	0.000418171
isogroup566	Pdgfa associated protein 1a	9e-55	9.50208	-2.41435	0.431533	-5.59481	2.21e-08	6.12e-07
isogroup567	Cytochrome P450 2W1	1e-124	72.4622	-3.47601	0.290152	-11.98	4.52e-33	2.13e-30
isogroup568	OCIA domain-containing protein 2	1e-42	114.374	-0.636367	0.145273	-4.38049	1.18e-05	0.000167184
isogroup56848	Serine proteinase inhibitor (Fragment)	4e-41	70.7507	-5.53154	0.416871	-13.2692	3.49e-40	2.85e-37
isogroup569	Transmembrane 9 superfamily member	3e-99	50.4257	-3.67576	0.259328	-14.1742	1.32e-45	1.54e-42
isogroup5690	Ch1073-321c8.1 (Fragment)	8e-33	12.7607	1.35186	0.273026	4.95138	7.37e-07	1.43e-05
isogroup5717	Apoptosis-associated speck protein containing a CARD3	5e-33	9.09675	-1.40437	0.345031	-4.07027	4.7e-05	0.000554117
isogroup572	4-trimethylaminobutyraldehyde dehydrogenase	5e-179	113.366	-3.02666	0.215558	-14.0411	8.74e-45	9.41e-42
isogroup57324	Vitellogenin	4e-18	1530.09	7.19013	0.778234	9.23903	2.49e-20	3.71e-18
isogroup5747	Nothepsin (Fragment)	1e-178	346.528	5.98759	0.832407	7.19311	6.33e-13	3.89e-11
isogroup5749	STAG2 (Fragment)	1e-80	31.5127	-1.00566	0.202403	-4.96859	6.74e-07	1.32e-05
isogroup5753	Activin beta A (Fragment)	1e-25	22.2795	-1.06618	0.303291	-3.51535	0.000439171	0.0036677
isogroup5761	Complement factor H-related protein 2	3e-87	19.6513	1.78853	0.409768	4.36473	1.27e-05	0.000178035
isogroup57998	C1QL2 (Fragment)	2e-22	1.8378	3.23231	0.7082	4.56411	5.02e-06	7.93e-05
isogroup5805	Cysteine-rich PDZ-binding protein	3e-64	19.7772	0.753525	0.220834	3.41217	0.000644472	0.00507583
isogroup5807	GTP cyclohydrolase 1	6e-113	11.962	-2.2343	0.544818	-4.10099	4.11e-05	0.000494263
isogroup5814	Thiamine pyrophosphokinase	1e-09	2.34722	1.89485	0.520848	3.638	0.00027476	0.00244929
isogroup582	ADP-ribosylation factor 14 effector protein	3e-126	4.45329	-1.95877	0.425165	-4.60708	4.08e-06	6.58e-05
isogroup5825	General transcription factor IIH polypeptide 4	1e-146	10.6812	1.64675	0.281047	5.85933	4.65e-09	1.47e-07
isogroup58381	Sulfotransferase	2e-14	2.20983	-3.17223	0.600961	-5.2786	1.3e-07	3.02e-06
isogroup584	Glucose-6-phosphate 1-dehydrogenase (Fragment)	3e-179	29.4889	1.24251	0.259191	4.79382	1.64e-06	2.92e-05
isogroup5849	Small nuclear ribonucleoprotein Sm D2	2e-56	9.88542	-0.928409	0.251525	-3.69113	0.000223263	0.00205467
isogroup5851	Periostin osteoblast specific factor a	6e-44	3.61197	-1.9318	0.539737	-3.57916	0.000344703	0.00298114
isogroup5874	Transposable element Tc1 transposase	2e-09	0.711019	-2.58073	0.718292	-3.59286	0.000327065	0.00284704
isogroup590	Peptidylprolyl isomerase	1e-134	42.8471	-1.87362	0.548434	-3.41631	0.000634749	0.00501891
isogroup59003	ATP-dependent RNA helicase DDX55	6e-25	1.28359	2.31633	0.694049	3.33742	0.000845607	0.0063641
isogroup5910	Calcium-binding mitochondrial carrier protein SCaMC-1	1e-36	1.40847	-2.47795	0.591439	-4.1897	2.79e-05	0.000353341
isogroup5911	Zgc:165617 protein	1e-47	20.6054	1.30119	0.217296	5.98812	2.12e-09	7.3e-08
isogroup592	Elongation factor Tu mitochondrial	1e-171	24.8787	-0.7221	0.19452	-3.71222	0.000205453	0.00191881
isogroup59208	E3 ubiquitin/ISG15 ligase TRIM25	4e-11	0.592186	-2.40485	0.745575	-3.22549	0.00125756	0.00882201
isogroup593	Leucine-rich alpha-2-glycoprotein putative	5e-124	1233.28	-1.31898	0.34355	-3.83925	0.000123409	0.00125181
isogroup59367	Zinc finger and BTB domain-containing protein 20	8e-16	9.32502	0.84693	0.265527	3.18962	0.00142458	0.00976388
isogroup5973	AT8A1	2e-87	1.16691	-2.57939	0.603902	-4.2712	1.94e-05	0.000258176
isogroup5994	Complement component C3 (Fragment)	5e-98	80.5974	2.49021	0.275803	9.02892	1.73e-19	2.39e-17
isogroup5996	Chromosome 17 SCAF14597 whole genome shotgun sequence	3e-82	1592.85	-0.723347	0.221274	-3.26901	0.00107925	0.00777707
isogroup600	Ammonium transporter Rh type B-B	3e-174	2.4944	-1.87566	0.545961	-3.43552	0.000591426	0.00472717
isogroup6004	Transposase	7e-13	1.69125	-2.47334	0.740611	-3.33959	0.000839014	0.00632396
isogroup601	Tensin-2	8e-138	21.4845	-1.72732	0.258036	-6.69409	2.17e-11	1.05e-09
isogroup6011	GTPase IMAP family member 4	2e-15	11.4044	4.23282	0.420062	10.0766	7.01e-24	1.61e-21
isogroup60156	Eukaryotic translation initiation factor 2 subunit 1	1e-52	4.85437	-1.12485	0.319814	-3.5172	0.000436125	0.00364833
isogroup6026	Myb X protein (Fragment)	1e-20	5.72882	1.1283	0.340001	3.31852	0.000904952	0.00674009
isogroup603	Vesicle-associated membrane protein 5	2e-12	53.126	0.822356	0.19465	4.2248	2.39e-05	0.000310453
isogroup60606	Furry homolog (Fragment)	1e-13	1.15773	-3.07717	0.585551	-5.25518	1.48e-07	3.37e-06
isogroup6067	Cholesterol 24-hydroxylase	3e-12	31.0868	-2.04588	0.279478	-7.32038	2.47e-13	1.57e-11
isogroup6080	Methyltransferase 7B protein	3e-35	8.24305	0.832326	0.260302	3.19754	0.00138604	0.00954744
isogroup6090	FGGY carbohydrate kinase domain-containing protein	9e-54	23.789	-1.18083	0.215246	-5.48597	4.11e-08	1.08e-06
isogroup6112	ATIF1 (Fragment)	2e-42	77.1389	-0.549842	0.142783	-3.85089	0.000117689	0.00120514
isogroup6123	YEATS domain-containing protein 4	1e-42	3.93833	-1.62402	0.382882	-4.24157	2.22e-05	0.000290772
isogroup6125	DYN2 (Fragment)	6e-16	18.9759	-0.941035	0.257019	-3.66134	0.000250897	0.0022749
isogroup6129	Alcohol dehydrogenase Class vi (Fragment)	1e-99	56.6454	-1.12918	0.18983	-5.94837	2.71e-09	9.05e-08
isogroup6156	Myb/SANT DNA-binding domain-containing 4 protein	4e-20	0.862121	-3.20668	0.650332	-4.93084	8.19e-07	1.57e-05
isogroup6158	Plastin-3	2e-101	3.18201	1.72272	0.447212	3.85213	0.000117094	0.0012015
isogroup616	Probable protein COQ10 mitochondrial	1e-122	28.0767	-1.02874	0.276441	-3.72139	0.000198132	0.00186023
isogroup617	Uridine-cytidine kinase 1	9e-39	12.1979	-1.97268	0.266175	-7.41122	1.25e-13	8.29e-12
isogroup6186	Type II antifreeze protein (Fragment)	2e-61	201.096	2.99789	0.481407	6.22735	4.74e-10	1.87e-08
isogroup61956	Potassium voltage-gated channel subfamily G member 2	2e-35	420.579	-0.890245	0.26509	-3.35827	0.000784326	0.00597749
isogroup6196	SPD2B (Fragment)	2e-27	2.38107	-1.98393	0.52733	-3.76221	0.000168418	0.00162009
isogroup62	Sulfotransferase	6e-160	138.399	-1.3326	0.169163	-7.87763	3.34e-15	2.78e-13
isogroup6209	Isoamyl acetate-hydrolyzing esterase 1 (Fragment)	7e-14	5.35857	-2.67963	0.828714	-3.23348	0.00122293	0.00863698
isogroup621	Phytanoyl-CoA dioxygenase peroxisomal	3e-170	508.328	1.0603	0.208083	5.09557	3.48e-07	7.22e-06
isogroup62223	Trypsinogen H2_3a4	7e-09	3947.2	6.91531	0.36518	18.9367	5.68e-80	2.14e-76
isogroup6234	Protein BCCIP homolog	4e-16	14.7745	-0.906009	0.252994	-3.58115	0.000342081	0.0029627
isogroup625	Zinc finger Ran-binding domain-containing protein 2	2e-74	43.4368	0.875416	0.160375	5.45857	4.8e-08	1.24e-06
isogroup6261	Transmembrane protein 229B	1e-69	3.50341	-2.17199	0.369898	-5.87187	4.31e-09	1.38e-07
isogroup6269	Choriogenin L	2e-144	239.866	6.43981	0.84537	7.61774	2.58e-14	1.89e-12
isogroup628	Elongation of very long chain fatty acids protein	3e-155	61.4142	-1.98336	0.282585	-7.01862	2.24e-12	1.28e-10
isogroup6284	Apolipoprotein B-100	2e-136	2.86999	1.69077	0.463821	3.64531	0.000267074	0.00239564
isogroup63	Reverse transcriptase	9e-95	24.5834	-6.14357	0.354701	-17.3204	3.3e-67	8.3e-64
isogroup6303	Type II (Periplasmic) bacterial L-asparaginase domain-containing protein	6e-76	55.8674	0.756746	0.21919	3.45247	0.000555473	0.00447301
isogroup63782	Vasoactive intestinal peptide receptor 1b (Fragment)	5e-53	9.97638	1.1922	0.344663	3.45904	0.000542109	0.00438059
isogroup6385	Zinc finger protein 235	5e-47	2.37483	2.03312	0.573857	3.54291	0.000395739	0.00336367
isogroup6426	Trans-aconitate 3-methyltransferase	3e-111	97.0513	3.46859	0.470991	7.36445	1.78e-13	1.15e-11
isogroup6437	Actin-related protein 2/3 complex subunit 4	7e-50	25.2366	0.584649	0.183732	3.18208	0.00146223	0.00997128
isogroup6440	SH3 domain and tetratricopeptide repeat-containing protein 2	2e-21	10.2438	1.16947	0.280496	4.1693	3.06e-05	0.000382323
isogroup6457	Chromosome 8 SCAF7842 whole genome shotgun sequence (Fragment)	5e-146	27.5561	-3.48838	0.534638	-6.52476	6.81e-11	3.1e-09
isogroup6466	Reverse transcriptase	2e-25	3.38527	3.97645	0.58792	6.76359	1.35e-11	6.73e-10
isogroup6499	Reticulon	9e-08	44.8334	-4.34028	0.489365	-8.8692	7.37e-19	9.58e-17
isogroup6521	Mitochondrial import inner membrane translocase subunit TIM14	7e-51	49.6135	-0.667059	0.171339	-3.89322	9.89e-05	0.00104345
isogroup6545	Arylsulfatase G	4e-160	2.04062	-1.63635	0.47721	-3.42899	0.000605825	0.00481843
isogroup6561	Inactive serine protease PAMR1	1e-68	2.44719	-2.07104	0.492863	-4.20207	2.64e-05	0.000337687
isogroup6566	Golgi SNAP receptor complex member 1	4e-51	15.6201	0.915326	0.216693	4.22407	2.4e-05	0.000310944
isogroup6581	Tetratricopeptide repeat domain 36 (Fragment)	1e-115	109.687	1.01881	0.174334	5.84402	5.1e-09	1.6e-07
isogroup6585	RNA binding motif single stranded interacting protein 2	1e-139	1.22073	2.67659	0.779587	3.43334	0.000596196	0.00475899
isogroup659	Solute carrier family 22 member 5	7e-148	18.0752	-6.36584	0.485287	-13.1177	2.61e-39	2.02e-36
isogroup6592	Complement component C3 (Fragment)	2e-92	435.964	-1.0602	0.234167	-4.52756	5.97e-06	9.27e-05
isogroup6678	Cytochrome c oxidase subunit 4 isoform 1 mitochondrial	4e-111	57.9777	-1.03026	0.168757	-6.10495	1.03e-09	3.79e-08
isogroup6683	Protein FAM20A	3e-28	85.4874	-0.834739	0.239092	-3.49128	0.000480705	0.0039619
isogroup6692	TSC2	3e-173	1.28149	-1.90716	0.551673	-3.45705	0.00054612	0.0044071
isogroup6693	Epithelial-stromal interaction protein 1	3e-20	12.9578	1.73159	0.41721	4.15041	3.32e-05	0.000410351
isogroup67	Clathrin light chain	2e-99	45.0443	-0.689528	0.121172	-5.6905	1.27e-08	3.69e-07
isogroup67132	TATA element modulatory factor	1e-33	2.79907	2.21206	0.512692	4.31461	1.6e-05	0.000218129
isogroup67257	Ankyrin repeat domain-containing protein 49	8e-13	1.46819	-4.1511	0.597707	-6.94503	3.78e-12	2.09e-10
isogroup675	Tributyltin-binding protein type	2e-89	388.116	-1.44634	0.330713	-4.3734	1.22e-05	0.000172061
isogroup67724	Cytosolic sulfotransferase 1	2e-17	1.46306	2.59337	0.715746	3.6233	0.000290864	0.00256558
isogroup6776	Glycerol-3-phosphate dehydrogenase [NAD(+)]	1e-66	4.94851	2.73004	0.492214	5.54645	2.92e-08	7.85e-07
isogroup6778	Cytochrome P450 CYP2N	5e-41	8.87508	1.78117	0.389719	4.57038	4.87e-06	7.72e-05
isogroup678	Chromosome 11 SCAF14528 whole genome shotgun sequence (Fragment)	2e-115	6.08815	-1.28421	0.368005	-3.48966	0.00048363	0.00398261
isogroup6780	Protein C (Inactivator of coagulation factors Va and VIIIa) (Fragment)	6e-26	1.48212	2.1673	0.632145	3.42849	0.00060694	0.00482559
isogroup67814	Hepatocyte nuclear factor 4-alpha	7e-55	0.816881	-2.87251	0.729678	-3.93668	8.26e-05	0.000899766
isogroup6786	Reverse transcriptase protein (Fragment)	1e-91	2.89456	-2.4914	0.467077	-5.33402	9.61e-08	2.3e-06
isogroup6794	Betaine homocysteine methyltransferase	2e-143	14016.7	-0.895152	0.18224	-4.91193	9.02e-07	1.71e-05
isogroup68	Inositol oxygenase	4e-177	950.696	-1.41978	0.187174	-7.58537	3.32e-14	2.41e-12
isogroup6800	Complement component C3 (Fragment)	3e-105	12072.2	-0.667545	0.122923	-5.4306	5.62e-08	1.42e-06
isogroup68093	Type II antifreeze protein (Fragment)	3e-06	15.2831	-3.82599	0.729573	-5.24415	1.57e-07	3.56e-06
isogroup68187	Metalloendopeptidase	8e-11	17.581	-3.28667	0.516367	-6.36497	1.95e-10	8.2e-09
isogroup68231	Clathrin heavy chain 1	4e-41	11.2775	1.19059	0.367879	3.23637	0.0012106	0.00856395
isogroup6824	ATP-binding cassette sub-family G member 4	3e-09	3.03065	2.53893	0.481711	5.27066	1.36e-07	3.14e-06
isogroup685	Sex hormone-binding globulin	8e-169	861.925	-0.472764	0.147622	-3.20254	0.00136222	0.00942094
isogroup686	Cathepsin B	7e-177	136.03	1.10861	0.250551	4.42469	9.66e-06	0.000140366
isogroup68726	GRAM domain-containing protein 3	4e-21	4.86323	1.69147	0.466611	3.62501	0.000288948	0.00255237
isogroup6873	SV2B (Fragment)	1e-17	2.80768	-5.02101	0.595967	-8.42498	3.61e-17	4e-15
isogroup69	Complement factor B	4e-159	728.294	-1.1816	0.140977	-8.38151	5.23e-17	5.65e-15
isogroup690	Multiple coagulation factor deficiency 2	6e-58	265.198	0.878473	0.19674	4.46515	8e-06	0.00011987
isogroup6916	Fucose mutarotase	8e-92	14.4884	0.760632	0.237058	3.20864	0.00133366	0.00925428
isogroup69161	T-cell surface glycoprotein CD4-2 (Fragment)	7e-09	2.1557	2.36128	0.61547	3.83656	0.000124771	0.00126224
isogroup692	Sodium-coupled neutral amino acid transporter 5	6e-164	17.0207	1.3343	0.302053	4.41743	9.99e-06	0.000144746
isogroup69264	Nuclear receptor coactivator 2	4e-11	3.7709	1.38657	0.391196	3.54443	0.000393466	0.00334718
isogroup6935	AT8B4	3e-23	3.30502	-5.17022	0.560777	-9.21975	2.98e-20	4.42e-18
isogroup6944	LYR motif-containing protein 2	6e-42	12.2754	-1.1684	0.255217	-4.57806	4.69e-06	7.46e-05
isogroup6946	Cytidine deaminase	2e-103	34.4791	-1.73641	0.365132	-4.75557	1.98e-06	3.46e-05
isogroup6965	Lysosomal-associated membrane protein 1	3e-10	47.6633	0.652537	0.172226	3.78884	0.000151351	0.00147999
isogroup6980	Transcription initiation factor TFIID subunit 3	1e-60	27.133	0.693801	0.172526	4.02143	5.78e-05	0.000664556
isogroup6992	Leucine rich repeat containing 40	5e-67	4.74585	-0.97161	0.285617	-3.4018	0.000669448	0.00524408
isogroup70081	Protein FAM20A	3e-38	2.3532	3.16492	0.583681	5.42234	5.88e-08	1.48e-06
isogroup701	Apolipoprotein B-100	9e-157	79.6769	2.3524	0.231227	10.1735	2.6e-24	6.23e-22
isogroup704	Soluble FGFR2 variant 3 (Fragment)	6e-63	16.5597	1.51848	0.357924	4.24246	2.21e-05	0.000289758
isogroup70465	Flotillin-2	6e-09	4.26351	2.10109	0.45124	4.65626	3.22e-06	5.31e-05
isogroup705	HMG box domain containing 4 (Fragment)	6e-157	10.7146	1.10713	0.308361	3.59037	0.000330214	0.00286914
isogroup708	Solute carrier family 38 member 5b	3e-180	167.06	-1.99575	0.164407	-12.1391	6.56e-34	3.24e-31
isogroup7085	Centrin2 (Fragment)	1e-91	15.8816	1.3166	0.281727	4.67332	2.96e-06	4.94e-05
isogroup7122	Nuclear protein 1	4e-29	363.007	1.46908	0.320459	4.5843	4.55e-06	7.26e-05
isogroup714	Carboxylic ester hydrolase	1e-15	26.4164	-1.36824	0.181105	-7.55495	4.19e-14	3.02e-12
isogroup7145	Sodium-dependent multivitamin transporter	2e-38	43.7494	-1.10773	0.20012	-5.53535	3.11e-08	8.31e-07
isogroup7157	Annexin (Fragment)	3e-72	269.735	-0.967271	0.188196	-5.13969	2.75e-07	5.87e-06
isogroup7177	LMBR1 domain containing 2a	3e-148	2.27387	-1.69042	0.486541	-3.47437	0.000512058	0.00417513
isogroup7201	RING finger protein 11	4e-95	4.91062	-2.71854	0.415423	-6.54402	5.99e-11	2.74e-09
isogroup7208	Aconitate hydratase	2e-50	0.800374	-2.48859	0.684858	-3.63372	0.000279359	0.00248441
isogroup7224	NLRC3 protein	1e-19	3.42243	-2.99651	0.42134	-7.11187	1.14e-12	6.77e-11
isogroup723	Integumentary mucin C.1 putative	1e-17	103.355	0.934617	0.165377	5.65144	1.59e-08	4.58e-07
isogroup72395	Chromosome 5 SCAF14581 whole genome shotgun sequence	8e-08	16.1516	2.93445	0.276476	10.6138	2.57e-26	7.32e-24
isogroup724	Eukaryotic translation initiation factor 3 subunit Jb (Fragment)	2e-56	77.4953	-1.01276	0.149602	-6.76968	1.29e-11	6.48e-10
isogroup7248	WW domain-binding protein 4	2e-34	5.23	1.9317	0.446894	4.3225	1.54e-05	0.0002108
isogroup7252	Reverse transcriptase (Fragment)	1e-50	1.13236	2.955	0.755241	3.91266	9.13e-05	0.000977916
isogroup7266	C3orf68 homolog	9e-26	2.02417	-1.51846	0.432051	-3.51454	0.000440513	0.00367687
isogroup728	Leiomodin-1	2e-92	4.98312	-4.02726	0.632955	-6.36264	1.98e-10	8.31e-09
isogroup7290	Protein ACN9 mitochondrial	8e-60	1.47488	-2.267	0.561389	-4.0382	5.39e-05	0.000625475
isogroup73251	Murinoglobulin-2	2e-19	3.03167	2.91985	0.647607	4.50868	6.52e-06	0.000100214
isogroup73332	Phosphatase orphan 1	2e-17	4.12236	-1.91858	0.470168	-4.08063	4.49e-05	0.000532833
isogroup7355	Vitellogenin Aa	9e-163	2446.35	7.73445	0.762263	10.1467	3.43e-24	8.08e-22
isogroup73573	Si:dkey-174c13.2	1e-09	4.30564	2.44495	0.474723	5.15027	2.6e-07	5.6e-06
isogroup73614	Signal transducer and activator of transcription	4e-17	1.54288	2.86406	0.734128	3.90131	9.57e-05	0.00101594
isogroup7381	BAW	4e-30	3.79379	2.1547	0.536707	4.01466	5.95e-05	0.000680023
isogroup74072	SCAN domain-containing protein 3	4e-19	1.39025	2.97401	0.741064	4.01316	5.99e-05	0.000683845
isogroup74190	Cytochrome c oxidase subunit 3	3e-31	4123.97	2.34528	0.245422	9.55611	1.22e-21	2.07e-19
isogroup7420	Succinate dehydrogenase assembly factor 4 mitochondrial (Fragment)	6e-37	19.1206	-0.752494	0.201888	-3.72729	0.000193549	0.00182189
isogroup74716	T-complex protein 1 subunit gamma (Fragment)	1e-31	989.229	1.28887	0.339675	3.79442	0.000147991	0.0014542
isogroup750	Complement C3 (Fragment)	5e-147	651.158	-0.792718	0.227454	-3.48519	0.000491795	0.00403127
isogroup7516	PPUP3535	3e-65	58.198	2.41402	0.42815	5.63824	1.72e-08	4.91e-07
isogroup75172	Myosin 1 beta (Fragment)	6e-42	3.16924	1.694	0.473168	3.58013	0.000343424	0.00297263
isogroup7657	Apolipoprotein M	6e-82	2037.08	-1.38117	0.169173	-8.16425	3.23e-16	3.11e-14
isogroup7675	Cyclin-G2	5e-06	15.8168	0.943497	0.296443	3.18273	0.00145895	0.00995419
isogroup768	Mono [ADP-ribose] polymerase PARP16	3e-122	15.617	1.18357	0.234243	5.05275	4.35e-07	8.87e-06
isogroup7687	UPF0577 protein (Fragment)	2e-09	4.1663	1.7435	0.488992	3.5655	0.000363163	0.00311842
isogroup77	Trafficking protein particle complex subunit 4	1e-131	86.6664	-0.607379	0.183641	-3.30742	0.000941601	0.00695125
isogroup773	Multiple inositol polyphosphate phosphatase 1	3e-174	148.776	0.69016	0.212589	3.24645	0.00116853	0.00832688
isogroup775	C1q and tumor necrosis factor related protein	1e-70	145.57	-1.11428	0.152403	-7.31141	2.64e-13	1.67e-11
isogroup7757	Low-density lipoprotein receptor	2e-17	15.813	-1.86918	0.395615	-4.72474	2.3e-06	3.97e-05
isogroup77637	EHD3 (Fragment)	2e-39	8.00039	1.13067	0.293153	3.85692	0.000114827	0.00118145
isogroup7766	Fgfr1op N-terminal like	6e-72	3.33409	1.32406	0.40339	3.28234	0.00102951	0.0074848
isogroup778	Estradiol 17-beta-dehydrogenase 12	3e-165	21.1925	-0.691129	0.187152	-3.69287	0.000221737	0.00204431
isogroup78	Cytochrome P450 4c3	3e-144	302.47	0.701312	0.19064	3.67872	0.000234405	0.00214535
isogroup780	Guanine nucleotide-binding protein 3 protein	2e-144	5.3992	-1.83326	0.411401	-4.45615	8.34e-06	0.000124114
isogroup7801	NADH-ubiquinone oxidoreductase chain 1	2e-124	669.158	-1.33444	0.244481	-5.45824	4.81e-08	1.24e-06
isogroup7807	MAP7 domain containing 3 (Fragment)	4e-60	0.935206	-2.20933	0.665698	-3.31882	0.000903984	0.00673646
isogroup78098	Beta-microseminoprotein (Fragment)	2e-08	0.916666	-2.76326	0.835328	-3.30799	0.000939666	0.00693867
isogroup7824	Complement component c3	1e-114	22.9583	-2.79777	0.283917	-9.8542	6.57e-23	1.29e-20
isogroup7832	Histone deacetylase	1e-07	5.40141	-1.4744	0.355934	-4.14235	3.44e-05	0.000422103
isogroup7833	Mitochondrial inner membrane protein OXA1L	2e-96	1.58615	2.84381	0.731847	3.8858	0.000101994	0.00106874
isogroup78593	Protein NLRC3	4e-07	4.85089	1.70657	0.493594	3.45743	0.000545353	0.00440251
isogroup7877	Leucine-rich PPR motif-containing protein mitochondrial	2e-81	4.78403	-1.33167	0.352373	-3.77916	0.000157361	0.00153163
isogroup7878	Receptor-transporting protein 3 (Fragment)	2e-83	11.4715	2.63328	0.567423	4.64077	3.47e-06	5.7e-05
isogroup78787	KIAA0391	1e-18	2.43362	3.87842	0.623095	6.22445	4.83e-10	1.9e-08
isogroup78853	Williams-Beuren syndrome chromosomal region 27 protein	2e-12	0.667043	2.50382	0.773945	3.23515	0.00121581	0.0085967
isogroup7908	THO complex subunit 7 homolog	4e-124	38.5955	0.565305	0.170926	3.3073	0.00094199	0.00695242
isogroup793	Cytochrome P450 2F5	6e-117	9.55008	-6.63282	0.550641	-12.0456	2.04e-33	9.79e-31
isogroup7941	Hydroxyacid-oxoacid transhydrogenase mitochondrial (Fragment)	3e-113	53.8825	-0.959196	0.211619	-4.53266	5.82e-06	9.07e-05
isogroup7966	ATP-binding cassette sub-family C (CFTR/MRP) member 4 (Fragment)	6e-22	1.89248	-2.87948	0.657559	-4.37905	1.19e-05	0.000168052
isogroup79764	F-acid glycoprotein	3e-11	681.682	-2.0585	0.529677	-3.88633	0.000101772	0.00106679
isogroup8	Insulin growth factor I Ea-2	4e-79	654.566	-0.550612	0.112054	-4.91383	8.93e-07	1.69e-05
isogroup8010	SHLB2	2e-106	2.2655	-2.73191	0.53771	-5.08064	3.76e-07	7.78e-06
isogroup802	Coagulation factor X	5e-119	684.267	-1.0035	0.179345	-5.59538	2.2e-08	6.1e-07
isogroup80228	ZK1236.4	9e-12	2.20737	3.16885	0.66829	4.74172	2.12e-06	3.68e-05
isogroup8042	Thyroid hormone receptor interactor 4 (Fragment)	7e-57	41.3312	2.09449	0.324959	6.44541	1.15e-10	5.04e-09
isogroup80475	Jumonji C domain containing histone demethylase 1 homolog D	1e-19	5.32812	-1.62115	0.405375	-3.99914	6.36e-05	0.000719655
isogroup8071	Chromosome 8 SCAF14543 whole genome shotgun sequence	2e-36	5.67521	1.41363	0.325572	4.34199	1.41e-05	0.000194435
isogroup8081	Peroxin (Fragment)	4e-08	12.3759	-1.08567	0.220523	-4.92316	8.52e-07	1.62e-05
isogroup80829	Alpha-amylase (Fragment)	3e-38	4.69488	4.86853	0.598883	8.12935	4.32e-16	4.07e-14
isogroup809	SID1 transmembrane family member 1	8e-161	15.4318	-0.833418	0.188996	-4.40972	1.04e-05	0.000148991
isogroup81	Proline-rich protein 15 protein A	8e-54	23.7823	0.708729	0.219678	3.22621	0.00125441	0.00880567
isogroup8136	PPUP9740 (Fragment)	3e-31	2.69805	-2.28962	0.501745	-4.5633	5.04e-06	7.95e-05
isogroup8137	UPF0728 protein	1e-45	6.48231	2.42098	0.489681	4.94399	7.65e-07	1.47e-05
isogroup817	MIA3 (Fragment)	2e-94	18.4739	-1.23296	0.2648	-4.65622	3.22e-06	5.31e-05
isogroup82	N-acetylated-alpha-linked acidic dipeptidase 2	2e-155	27.8672	1.52338	0.28391	5.36571	8.06e-08	1.96e-06
isogroup8203	Putative pre-mRNA-splicing factor ATP-dependent RNA helicase DHX16	7e-65	7.05742	1.03229	0.269195	3.83475	0.000125694	0.00126902
isogroup822	Cytochrome P450 2F2	3e-120	2.39045	-2.78563	0.510562	-5.45601	4.87e-08	1.25e-06
isogroup8224	Protein SET	4e-116	36.9501	0.688804	0.200029	3.44352	0.000574185	0.00460279
isogroup823	Ferredoxin 1	4e-92	32.1513	-3.05916	0.260555	-11.7409	7.86e-32	3.34e-29
isogroup8233	Alpha-2-macroglobulin	5e-34	177.784	-3.66626	0.301041	-12.1786	4.04e-34	2.07e-31
isogroup8242	Ubiquitously-expressed transcript	2e-81	5.91573	-1.99707	0.355014	-5.62533	1.85e-08	5.25e-07
isogroup8285	Sodium bicarbonate cotransporter isoform 1 (Fragment)	2e-27	1.86692	-3.4902	0.568584	-6.1384	8.34e-10	3.11e-08
isogroup829	Chromosome 3 SCAF14700 whole genome shotgun sequence (Fragment)	5e-132	5.99232	0.994772	0.274068	3.62965	0.000283808	0.00251588
isogroup8294	Aminopeptidase N	7e-42	5.66208	-1.05439	0.327879	-3.21581	0.00130078	0.00906787
isogroup8321	Elongin-C	6e-78	19.72	0.672188	0.208981	3.21651	0.00129761	0.00904998
isogroup8333	Alpha-protein kinase 3	9e-110	1.20999	2.55117	0.797178	3.20026	0.00137305	0.0094753
isogroup8339	GTPase IMAP family member 4	3e-68	6.54057	1.87822	0.564935	3.32467	0.000885227	0.00661114
isogroup8363	Sulfurtransferase	3e-40	31.1735	0.752723	0.215068	3.49992	0.000465396	0.00385258
isogroup837	Electron-transfer-flavoprotein beta polypeptide	2e-135	222.978	-0.886463	0.142553	-6.21848	5.02e-10	1.97e-08
isogroup8377	Mitochondrial methylmalonate-semialdehyde dehydrogenase (Fragment)	1e-100	146.858	-0.692795	0.176752	-3.91958	8.87e-05	0.000952977
isogroup8386	Zinc finger CCHC-type and RNA-binding motif-containing protein 1	1e-89	11.0326	0.873403	0.254349	3.43388	0.000595013	0.00475081
isogroup842	Probable nucleolar protein 5-2	1e-179	25.8651	-1.42373	0.332957	-4.276	1.9e-05	0.000253118
isogroup8421	Chromosome 4 SCAF15093 whole genome shotgun sequence	4e-83	4.61921	1.88592	0.380681	4.95407	7.27e-07	1.41e-05
isogroup843	Probable deoxyhypusine synthase	2e-176	10.6728	-0.84124	0.254188	-3.30951	0.000934578	0.00690805
isogroup8433	Double-stranded RNA-dependent protein kinase	2e-41	10.925	1.83818	0.407456	4.51135	6.44e-06	9.91e-05
isogroup8446	GTPase IMAP family member 2	1e-28	4.29039	-1.61107	0.412791	-3.90287	9.51e-05	0.00101117
isogroup8463	Gap junction protein	6e-11	1.47236	-2.90905	0.582631	-4.99296	5.95e-07	1.18e-05
isogroup8475	Cytochrome c oxidase subunit 7A-related protein mitochondrial	5e-65	63.856	-0.695746	0.136067	-5.11327	3.17e-07	6.65e-06
isogroup848	Cytochrome P450 2J2	3e-179	16.4572	-3.7456	0.388996	-9.62891	6.04e-22	1.07e-19
isogroup8497	Swelling dependent chloride channel	1e-52	9.70887	-0.973699	0.265446	-3.66817	0.000244295	0.00222417
isogroup850	Flotillin-1	2e-30	54.2832	0.51362	0.115424	4.44986	8.59e-06	0.00012721
isogroup852	Steryl-sulfatase	2e-137	31.8337	-1.31049	0.209667	-6.25035	4.1e-10	1.63e-08
isogroup856	Reverse transcriptase protein	1e-104	30.0486	-4.67462	0.34491	-13.5531	7.59e-42	6.36e-39
isogroup8584	Cytidine deaminase	8e-88	22.5958	-1.03506	0.250623	-4.12994	3.63e-05	0.000441764
isogroup863	Chromosome 10 SCAF15019 whole genome shotgun sequence	2e-76	12.8758	0.982387	0.219719	4.4711	7.78e-06	0.000117043
isogroup8654	Prolactin-releasing peptide	8e-57	1.04024	-3.39245	0.644184	-5.26627	1.39e-07	3.2e-06
isogroup8655	Molybdenum cofactor biosynthesis protein 1	2e-15	5.18961	-2.34214	0.353349	-6.62841	3.39e-11	1.61e-09
isogroup866	Protein FAM198A	1e-24	5.10748	2.03397	0.507545	4.00746	6.14e-05	0.000698445
isogroup8686	3-oxo-5-beta-steroid 4-dehydrogenase	1e-135	4.06485	1.46519	0.375865	3.89819	9.69e-05	0.00102684
isogroup8687	Heparan-alpha-glucosaminide N-acetyltransferase	8e-47	1.67496	-2.521	0.594776	-4.23858	2.25e-05	0.000294171
isogroup8724	Cyclin D (Fragment)	1e-23	2.26085	3.18018	0.648359	4.90497	9.34e-07	1.76e-05
isogroup8759	Nicotinamide phosphoribosyltransferase	5e-71	4.5013	-2.54505	0.425687	-5.97869	2.25e-09	7.7e-08
isogroup8778	FYVE and coiled-coil domain-containing protein 1	1e-100	5.44012	1.45815	0.365639	3.98796	6.66e-05	0.000749639
isogroup8897	Chromosome 8 SCAF13813 whole genome shotgun sequence (Fragment)	9e-58	3.93681	-1.48581	0.459936	-3.23047	0.00123587	0.00869988
isogroup89	CMP-N-acetylneuraminate-beta-galactosamide-alpha-23-sialyltransferase 4	5e-97	156.123	0.834849	0.145642	5.73218	9.91e-09	2.96e-07
isogroup890	TEN3 (Fragment)	3e-126	5.57982	-1.77174	0.422423	-4.19424	2.74e-05	0.000347359
isogroup8903	Sodium-coupled neutral amino acid transporter 3	7e-08	11.6111	-1.05069	0.310354	-3.38546	0.000710586	0.00551445
isogroup8921	DAG1 (Fragment)	2e-74	43.7388	-4.31558	0.46624	-9.25613	2.12e-20	3.18e-18
isogroup8948	Mannose-P-dolichol utilization defect 1 protein	5e-100	0.705434	-2.53085	0.661947	-3.82335	0.000131651	0.00131895
isogroup897	Glycerate kinase (Fragment)	2e-90	78.1654	0.97657	0.184491	5.29333	1.2e-07	2.81e-06
isogroup8975	Mothers against decapentaplegic homolog 9	7e-22	5.18046	1.81602	0.372871	4.87037	1.11e-06	2.07e-05
isogroup9	Very long-chain acyl-CoA synthetase	3e-140	518.524	1.30113	0.293744	4.42946	9.45e-06	0.000137893
isogroup900	Phosphatidate phosphatase LPIN1	2e-158	15.2057	-1.66218	0.283653	-5.85991	4.63e-09	1.47e-07
isogroup9002	UDP-glucuronosyltransferase	3e-32	13.6961	-3.74344	0.349913	-10.6982	1.04e-26	3.13e-24
isogroup9029	Pentaxin	5e-101	35.6366	3.23808	0.554699	5.83755	5.3e-09	1.66e-07
isogroup904	Gap junction protein	1e-153	80.3001	-0.654597	0.195691	-3.34505	0.000822669	0.00622409
isogroup906	Sulfotransferase 1C1	4e-114	221.595	-0.807184	0.206221	-3.91416	9.07e-05	0.000973248
isogroup9082	Ankyrin repeat domain-containing protein 2	2e-39	2.81037	3.94365	0.63581	6.20256	5.56e-10	2.15e-08
isogroup909	Constitutive coactivator of PPAR-gamma protein 1	2e-52	12.1902	-0.910196	0.20329	-4.47733	7.56e-06	0.000114196
isogroup9104	Bile acid-CoA:amino acid N-acyltransferase	1e-12	18.5157	2.72392	0.367311	7.41585	1.21e-13	8.03e-12
isogroup9111	Cytochrome P450 2D15	5e-10	4.48066	-3.64154	0.533748	-6.82258	8.94e-12	4.63e-10
isogroup914	Integral membrane protein 2B	3e-159	509.43	1.04746	0.102519	10.2172	1.66e-24	4.1e-22
isogroup919	Choline transporter protein 2	1e-170	10.2889	0.783569	0.243293	3.22068	0.00127889	0.00894006
isogroup9196	Pleckstrin domain-containing family G member 2	4e-16	4.25657	-1.73107	0.39238	-4.41173	1.03e-05	0.000147757
isogroup92	Probable urocanate hydratase	3e-151	82.3127	-1.12213	0.232145	-4.83373	1.34e-06	2.45e-05
isogroup9223	DNA-directed RNA polymerases I and III subunit RPAC1	5e-94	3.92368	-1.7609	0.458667	-3.83917	0.00012345	0.00125181
isogroup9249	Chromosome 1 SCAF14640 whole genome shotgun sequence	1e-80	0.821555	-3.24216	0.650973	-4.98049	6.34e-07	1.25e-05
isogroup927	Pyroglutamyl-peptidase 1	2e-132	20.8947	1.65622	0.207422	7.98476	1.41e-15	1.22e-13
isogroup929	Complement factor H	2e-154	1776.68	-1.06577	0.210903	-5.05339	4.34e-07	8.86e-06
isogroup93	UDP-glucuronosyltransferase 2A1	4e-128	135.538	-2.68884	0.248144	-10.8358	2.33e-27	7.4e-25
isogroup935	Ferritin	2e-116	2.27984	-2.41776	0.526967	-4.58807	4.47e-06	7.15e-05
isogroup937	NADH dehydrogenase iron-sulfur protein 8 mitochondrial	2e-128	30.7916	-0.589832	0.151397	-3.89593	9.78e-05	0.00103436
isogroup9370	PPUP455 (Fragment)	2e-08	24.6919	-2.60134	0.424977	-6.12114	9.29e-10	3.45e-08
isogroup9488	S-formylglutathione hydrolase	5e-95	47.327	0.760626	0.147331	5.16271	2.43e-07	5.29e-06
isogroup9492	Peroxiredoxin-1	1e-132	23.3578	1.25692	0.354977	3.54086	0.00039882	0.00338699
isogroup9496	Otopetrin-3 (Fragment)	1e-48	6.10703	-3.72288	0.45018	-8.26975	1.34e-16	1.36e-14
isogroup9499	PLD1 (Fragment)	7e-86	23.113	-5.46263	0.614645	-8.88747	6.25e-19	8.23e-17
isogroup951	NADH-ubiquinone oxidoreductase chain 4	1e-170	185.637	-0.861866	0.259937	-3.31568	0.000914219	0.00679234
isogroup9517	Synaptonemal complex protein 1	8e-12	4.8641	3.20591	0.489148	6.55406	5.6e-11	2.57e-09
isogroup9522	TSC22 domain family protein 3	2e-76	3.94741	1.82927	0.464061	3.94188	8.08e-05	0.000883454
isogroup9536	LIN1 (Fragment)	2e-33	1.32057	-2.44567	0.60533	-4.04022	5.34e-05	0.000620332
isogroup957	Cell death activator CIDE-B	3e-121	231.108	0.996445	0.127013	7.84523	4.32e-15	3.51e-13
isogroup9595	SWI/SNF-related matrix-associated actin-dependent regulator of chromatin subfamily A protein 1	1e-98	5.70769	1.14394	0.346746	3.29906	0.000970087	0.0071124
isogroup961	Cysteine dioxygenase type I	2e-133	401.671	-1.68842	0.350815	-4.81284	1.49e-06	2.69e-05
isogroup962	Isoaspartyl peptidase/L-asparaginase	1e-108	119.308	1.15275	0.305854	3.76896	0.00016393	0.00158296
isogroup9635	UNQ655/PRO1286	5e-26	8.17402	-1.09055	0.260209	-4.19106	2.78e-05	0.000351519
isogroup9652	1-acylglycerol-3-phosphate O-acyltransferase ABHD5	1e-83	7.32177	-1.59198	0.421202	-3.77961	0.000157071	0.00152948
isogroup9656	Merlin	3e-41	29.5144	-3.5529	0.364235	-9.75443	1.77e-22	3.35e-20
isogroup9673	Protein NLRC3 (Fragment)	7e-157	19.7373	-1.24022	0.28561	-4.34238	1.41e-05	0.00019427
isogroup9692	Reticulon	2e-23	13.6346	2.35294	0.531395	4.42784	9.52e-06	0.000138799
isogroup9725	Receptor protein-tyrosine kinase	2e-27	57.9932	0.812581	0.214618	3.78617	0.000152989	0.00149262
isogroup9759	Tripartite motif-containing protein 35	3e-73	11.0744	-4.70998	0.469024	-10.0421	9.95e-24	2.22e-21
isogroup9779	VPS41 (Fragment)	3e-143	5.02954	2.28922	0.435135	5.26096	1.43e-07	3.29e-06
isogroup979	Probable 26S proteasome non-ATPase regulatory subunit 3	5e-168	14.464	-0.9099	0.239071	-3.80599	0.000141237	0.00140247
isogroup9790	RAB31 member RAS oncogene family	2e-119	25.38	2.95051	0.42425	6.95465	3.53e-12	1.96e-10
isogroup981	Serine hydrolase 2 protein	2e-157	4.85449	-1.31722	0.368919	-3.57049	0.000356317	0.00306575
isogroup9835	TC1 transposase protein	7e-18	16.4164	2.52386	0.422571	5.97262	2.33e-09	7.95e-08
isogroup9836	Mitogen-activated protein kinase kinase 2a	2e-119	3.10599	2.41543	0.57579	4.19499	2.73e-05	0.000346353
isogroup984	Coagulation factor X	4e-157	165.367	-1.12303	0.150282	-7.4728	7.85e-14	5.42e-12
isogroup9848	Galectin	9e-57	4.64149	1.64366	0.515546	3.1882	0.00143161	0.00979649
isogroup986	Merlin	1e-35	29.7632	-1.93946	0.497464	-3.89869	9.67e-05	0.00102555
isogroup987	Cell differentiation protein RCD1 homolog	1e-141	3.31359	-1.34654	0.421086	-3.19777	0.00138495	0.00954216
isogroup9881	DNA-dependent protein kinase catalytic subunit	5e-63	2.99207	1.78719	0.479083	3.73043	0.000191151	0.00180416
isogroup9888	Interleukin-8 protein	2e-34	19.8422	2.35032	0.368552	6.37717	1.8e-10	7.61e-09
isogroup9892	Eukaryotic translation initiation factor 3 subunit L	4e-119	218.211	-0.853132	0.129856	-6.56985	5.04e-11	2.34e-09
isogroup9905	Tyrosine-protein kinase	2e-18	3.72061	1.31746	0.375887	3.50494	0.000456715	0.00379008
isogroup991	Pol polyprotein (Fragment)	2e-158	2.71517	-4.65651	0.656556	-7.09233	1.32e-12	7.75e-11
isogroup9910	MDR1A	2e-58	20.2748	-1.5924	0.415536	-3.83216	0.000127023	0.00128099
isogroup9934	SH3 domain-binding glutamic acid-rich protein	4e-60	2.65609	1.55947	0.483979	3.22218	0.00127221	0.00889749
isogroup9948	ES1 protein mitochondrial	7e-121	14.3476	2.06624	0.523674	3.94567	7.96e-05	0.000871708
isogroup9988	TOM20	2e-62	5.55345	-1.31914	0.375296	-3.51493	0.000439875	0.00367257
isogroup999	Double-stranded RNA-binding protein Staufen homolog 2	1e-09	97.3917	-0.794123	0.136387	-5.82256	5.8e-09	1.81e-07
isogroup9998	Histone H4	1e-48	1.04325	-3.05002	0.803344	-3.79666	0.000146659	0.001443

## Sheet: car-mac
isogroup	Protein	e.value	baseMean	log2FoldChange	lfcSE	stat	pvalue	padj
isogroup10031	Si:ch211-262h13.3 protein	2e-16	3.28114	3.61677	0.736962	4.90768	9.22e-07	2.15e-05
isogroup1005	UDP-glucuronosyltransferase 1-1	7e-160	9.69498	1.96173	0.379204	5.17329	2.3e-07	6.29e-06
isogroup10057	Cytochrome c oxidase subunit VIIa-related protein mitochondrial	1e-34	3.41377	-4.99845	0.592328	-8.43866	3.21e-17	4.44e-15
isogroup1009	Bleomycin hydrolase (Fragment)	1e-160	10.2306	-1.16908	0.314306	-3.71957	0.00019956	0.00222912
isogroup1010	Calpastatin	4e-28	92.7569	1.33697	0.142489	9.38299	6.41e-21	1.31e-18
isogroup1012	Ras GTPase-activating protein IQGAP2	2e-150	76.7217	0.537736	0.157511	3.41397	0.000640239	0.00594254
isogroup1014	Fetuin-B	2e-158	416.484	-1.39423	0.134758	-10.3462	4.35e-25	1.41e-22
isogroup10149	RPAC2	4e-66	7.01819	-1.32327	0.399857	-3.30937	0.000935058	0.00811015
isogroup10168	Solute carrier family 35 member F5	3e-34	7.64417	3.20661	0.546331	5.86936	4.37e-09	1.74e-07
isogroup10215	Reverse transcriptase (Fragment)	2e-41	3.51204	-2.19099	0.54974	-3.9855	6.73e-05	0.000884296
isogroup10241	Complement factor H-related protein 2	4e-31	2.29862	-2.54642	0.636316	-4.00182	6.29e-05	0.000832181
isogroup10246	Nuclear nucleic acid-binding protein C1D	9e-85	2.92536	-2.39599	0.598924	-4.00049	6.32e-05	0.000836409
isogroup10259	Transmembrane protein 120A	3e-54	11.1565	-2.10396	0.464675	-4.52782	5.96e-06	0.000110432
isogroup1026	Glyceronephosphate O-acyltransferase	1e-68	58.1543	1.25071	0.344139	3.63432	0.000278716	0.0029502
isogroup10306	RAPH1 (Fragment)	2e-06	14.7971	-1.39643	0.307042	-4.54802	5.42e-06	0.000101692
isogroup1033	Protein MAK16	1e-136	6.5921	-1.91647	0.545646	-3.51229	0.000444257	0.00439046
isogroup10347	Alpha-N-acetylgalactosaminidase	1e-81	7.36443	3.01665	0.408624	7.38246	1.55e-13	1.38e-11
isogroup1035	Aldose reductase	8e-88	130.453	-1.79096	0.151402	-11.8292	2.76e-32	1.81e-29
isogroup10356	Serine/threonine-protein kinase mTOR	9e-33	9.5389	1.29364	0.347441	3.72333	0.000196615	0.00220182
isogroup10369	Cytochrome b-c1 complex subunit 10	1e-25	123.916	-0.883704	0.22988	-3.84419	0.00012095	0.00146308
isogroup10372	Neural cell expressed developmentally down-regulated 4 E3 ubiquitin protein ligase (Fragment)	2e-66	8.96469	-1.37305	0.363538	-3.77691	0.000158785	0.00184267
isogroup10437	Complement C1q protein 3	4e-33	2.89417	-1.75549	0.483106	-3.63375	0.000279329	0.00295466
isogroup10457	Pleckstrin homology domain family B member 2 (Fragment)	3e-131	5.83856	2.33153	0.42577	5.47604	4.35e-08	1.4e-06
isogroup10466	p3 protein	2e-11	38.6317	-2.56422	0.254384	-10.0801	6.76e-24	2.01e-21
isogroup1051	Alpha-2-HS-glycoprotein	6e-144	6875.32	-1.43935	0.231684	-6.21256	5.21e-10	2.49e-08
isogroup10550	Argininosuccinate lyase putative	6e-72	10.3674	-1.55411	0.354653	-4.38206	1.18e-05	0.000197437
isogroup10570	Sterile alpha motif domain containing 13	2e-16	2.01092	-2.37346	0.715598	-3.31675	0.000910713	0.00794144
isogroup10610	CO3 (Fragment)	6e-46	13.2944	2.50043	0.410375	6.09304	1.11e-09	4.96e-08
isogroup10692	Tob1	4e-39	187.382	-1.03541	0.281493	-3.67827	0.000234822	0.00255217
isogroup107	Secernin-2	8e-154	29.1935	1.00593	0.233723	4.30394	1.68e-05	0.000267365
isogroup10702	Mitochondrial enolase superfamily member 1	1e-50	12.6156	0.980416	0.265231	3.69646	0.000218627	0.00240583
isogroup10710	Homeodomain-interacting protein kinase 1	6e-21	4.62958	-1.47449	0.41602	-3.54427	0.000393705	0.00396716
isogroup10768	pre-rRNA processing protein FTSJ3	1e-33	3.62433	-1.65538	0.452519	-3.65814	0.000254051	0.00272371
isogroup10784	Aminopeptidase N	2e-71	2.53445	-2.97048	0.567611	-5.2333	1.67e-07	4.74e-06
isogroup1081	Solute carrier family 22 member 13	4e-180	8.66214	-1.71673	0.393514	-4.36256	1.29e-05	0.000212412
isogroup10824	Solute carrier family 22 member 16	2e-129	6.22987	1.81504	0.482374	3.76273	0.000168071	0.00193514
isogroup1084	Complement component C3	5e-179	62.9562	-1.36091	0.291247	-4.6727	2.97e-06	6.09e-05
isogroup10866	CTD small phosphatase protein 2-B	1e-31	9.52711	-2.20957	0.345346	-6.39813	1.57e-10	8.25e-09
isogroup1087	Alpha-kinase 1	2e-179	3.94178	-1.50425	0.433593	-3.46927	0.000521877	0.00504122
isogroup10875	Granzyme	2e-46	5.90584	4.42848	0.666209	6.64727	2.99e-11	1.8e-09
isogroup1088	Tetraspanin	1e-138	61.6262	0.739824	0.168166	4.39936	1.09e-05	0.000184645
isogroup10896	Melanocortin 2 receptor accessory protein (Fragment)	2e-22	21.5861	2.98459	0.44167	6.7575	1.4e-11	8.89e-10
isogroup10937	Hephaestin 1 (Fragment)	8e-20	6.19482	1.88364	0.404325	4.65874	3.18e-06	6.44e-05
isogroup11	Chromosome 3 open reading frame 17	2e-138	62.0718	-2.36914	0.217239	-10.9057	1.08e-27	4.57e-25
isogroup1100	CYLD (Fragment)	3e-160	14.7131	1.15159	0.247242	4.65776	3.2e-06	6.46e-05
isogroup11031	Tumor necrosis factor receptor superfamily member 5	1e-07	2.47502	3.58384	0.63725	5.62392	1.87e-08	6.59e-07
isogroup11061	Axin interactor dorsalization-associated protein (Fragment)	2e-58	2.27481	1.65262	0.496085	3.33132	0.00086436	0.00761042
isogroup11070	Pannexin 2	7e-106	7.37494	-0.994149	0.292301	-3.40111	0.000671116	0.00617639
isogroup11114	Methylmalonic aciduria and homocystinuria type D protein mitochondrial	1e-23	6.63415	-1.99869	0.441481	-4.52724	5.98e-06	0.000110667
isogroup1112	Mx2 protein	9e-177	8.99004	3.80592	0.563498	6.7541	1.44e-11	9.08e-10
isogroup11122	Apoptosis-inducing factor 2	1e-119	1.78005	2.73191	0.677227	4.03397	5.48e-05	0.000741023
isogroup11133	Cleavage and polyadenylation specificity factor subunit 3	3e-126	2.93381	1.70096	0.451354	3.76858	0.000164177	0.0018981
isogroup1119	Eukaryotic elongation factor selenocysteine-tRNA-specific (Fragment)	1e-45	9.0897	-1.8033	0.35549	-5.0727	3.92e-07	1.02e-05
isogroup11231	Dolichol phosphate-mannose biosynthesis regulatory protein	1e-47	2.22356	-2.50767	0.580184	-4.3222	1.54e-05	0.000248213
isogroup1131	Endothelial differentiation-related factor 1	1e-88	122.661	0.393078	0.116765	3.36639	0.000761581	0.00687055
isogroup11314	Regulator of microtubule dynamics protein 1	2e-13	54.4576	-1.60134	0.212947	-7.5199	5.48e-14	5.14e-12
isogroup1132	Starch-binding domain-containing protein 1	6e-102	8.8126	1.69179	0.382933	4.41798	9.96e-06	0.000171139
isogroup11321	Acidic mammalian chitinase	5e-16	10.6081	2.30408	0.301285	7.64751	2.05e-14	2.01e-12
isogroup1134	Phospholipase A2 group VII (Platelet-activating factor acetylhydrolase plasma)	1e-177	12.5092	-2.07192	0.363205	-5.70455	1.17e-08	4.3e-07
isogroup1136	Fibroblast growth factor 23 (Fragment)	7e-134	32.3119	-2.04252	0.387819	-5.26668	1.39e-07	4.03e-06
isogroup11376	CALM (Fragment)	4e-117	56.2132	0.781802	0.236489	3.30587	0.000946809	0.00819539
isogroup1139	DnaJ homolog subfamily C member 22	1e-99	22.5591	-0.855456	0.206469	-4.14326	3.42e-05	0.00049335
isogroup114	Cytochrome P450 3A40	1e-149	42.3951	-1.23551	0.20698	-5.96922	2.38e-09	1e-07
isogroup11425	Sphingolipid delta(4)-desaturase DES1	7e-100	5.08469	1.40468	0.410672	3.42044	0.000625207	0.00582406
isogroup1143	Protein tyrosine phosphatase receptor type f b (Fragment)	1e-111	16.3881	1.50855	0.248521	6.0701	1.28e-09	5.62e-08
isogroup1145	S-acyl fatty acid synthase thioesterase medium chain	7e-79	5.29968	-1.3165	0.375364	-3.50727	0.000452736	0.00446709
isogroup11469	Probable E3 ubiquitin-protein ligase HERC4	4e-26	9.2363	2.51099	0.685548	3.66275	0.000249521	0.00268261
isogroup1147	Cytochrome P450 2J2	2e-78	59.3399	-3.1219	0.331775	-9.40969	4.98e-21	1.04e-18
isogroup1149	Lambda-crystallin homolog	3e-124	6.74152	-2.04772	0.369772	-5.5378	3.06e-08	1.02e-06
isogroup1152	GRAM domain-containing protein 3	2e-179	1.67692	2.4573	0.656252	3.74444	0.000180796	0.00205102
isogroup11578	Cytochrome c oxidase subunit	2e-52	153.193	1.18754	0.236237	5.02691	4.98e-07	1.26e-05
isogroup1158	Arsenite methyltransferase	3e-115	23.957	1.31483	0.299459	4.39067	1.13e-05	0.000190787
isogroup1159	DUS19 (Fragment)	1e-107	6.56692	-2.97282	0.413488	-7.1896	6.5e-13	5.25e-11
isogroup11601	Leucine-rich repeat-containing G protein coupled receptor 8	2e-09	1.97358	-4.14121	0.655662	-6.31608	2.68e-10	1.36e-08
isogroup1161	Peptidylprolyl isomerase (Fragment)	3e-53	119.728	-0.845175	0.193614	-4.36525	1.27e-05	0.00021054
isogroup1162	Membrane-spanning 4-domains subfamily A member 8A	7e-92	36.4129	2.65211	0.338854	7.82672	5.01e-15	5.4e-13
isogroup11683	Fatty acid binding protein 1	5e-72	216.457	1.30179	0.398663	3.2654	0.00109308	0.0091812
isogroup1179	Hibernation-specific plasma protein HP-55	3e-76	1219.64	-1.22811	0.172019	-7.13938	9.38e-13	7.39e-11
isogroup11798	Interferon-induced very large GTPase 1	6e-53	4.13799	-2.26325	0.611177	-3.7031	0.000212982	0.0023538
isogroup1186	Reticulocalbin-3	4e-120	11.6535	-2.4562	0.309032	-7.94805	1.89e-15	2.18e-13
isogroup11881	Tryptophan hydroxylase	1e-21	4.7303	-3.98765	0.509073	-7.83317	4.76e-15	5.16e-13
isogroup11920	PPUP4125 (Fragment)	1e-79	27.4755	2.63762	0.421748	6.25403	4e-10	1.95e-08
isogroup11931	Protein PAT1 homolog 1	2e-46	1.90665	2.2512	0.622618	3.6157	0.000299537	0.00313721
isogroup11995	Par-6 partitioning defective 6 homolog gamma B (Fragment)	4e-11	9.09076	3.13331	0.356536	8.78819	1.52e-18	2.44e-16
isogroup120	Peroxisomal acyl-coenzyme A oxidase 3	2e-137	35.1637	-4.30766	0.3732	-11.5425	8.06e-31	4.69e-28
isogroup12043	Ras-related protein Rab-20 (Fragment)	1e-62	1.89266	-2.81964	0.653692	-4.31341	1.61e-05	0.000256825
isogroup12090	Chromosome 1 open reading frame 21	3e-68	13.6417	1.74799	0.285131	6.13048	8.76e-10	4e-08
isogroup12179	tRNA aspartic acid methyltransferase 1	8e-92	1.20188	2.97511	0.683169	4.35487	1.33e-05	0.00021837
isogroup12248	Multidrug resistance-associated protein 4	2e-26	4.90098	-2.00993	0.45205	-4.44626	8.74e-06	0.000152733
isogroup12256	Cytochrome P450 2N14	7e-120	31.0174	-6.83919	0.675907	-10.1185	4.57e-24	1.38e-21
isogroup12269	Transmembrane protein 229B	3e-09	1.88498	-2.30258	0.695005	-3.31304	0.000922866	0.00801342
isogroup12290	Glycoprotein endo-alpha-12-mannosidase	1e-31	14.9366	1.1865	0.258025	4.59839	4.26e-06	8.25e-05
isogroup12311	Chromosome 1 SCAF14573 whole genome shotgun sequence (Fragment)	2e-30	3.56669	1.8912	0.469525	4.02789	5.63e-05	0.00075654
isogroup1233	Aldo-keto reductase family 1 member B10	3e-177	128.401	2.53296	0.269959	9.38276	6.43e-21	1.31e-18
isogroup12398	RET2	3e-88	168.68	1.29157	0.281933	4.58111	4.63e-06	8.89e-05
isogroup12400	Phosphate transporter (Fragment)	1e-20	6.47562	-2.91198	0.467991	-6.2223	4.9e-10	2.35e-08
isogroup12409	C-C motif chemokine	1e-16	10.168	1.11961	0.277967	4.02787	5.63e-05	0.00075654
isogroup1242	NED4L	4e-93	48.8745	-1.79357	0.222907	-8.04625	8.54e-16	1.01e-13
isogroup12443	RL14 (Fragment)	1e-91	1424.17	-0.796393	0.154041	-5.17002	2.34e-07	6.37e-06
isogroup12480	Chromosome 13 SCAF14627 whole genome shotgun sequence	2e-11	32.9575	-2.07547	0.494693	-4.19547	2.72e-05	0.000404869
isogroup12503	Hepcidin	9e-19	245.541	-4.22342	0.384226	-10.992	4.18e-28	1.81e-25
isogroup12525	MMAB (Fragment)	3e-93	2.54925	1.98583	0.517854	3.83473	0.000125703	0.00151224
isogroup12536	Upf0249 protein ydjc homolog	1e-30	3.65121	-3.62875	0.734738	-4.93883	7.86e-07	1.86e-05
isogroup12554	Spindle assembly abnormal protein 6	2e-15	2.2223	-3.63023	0.807165	-4.49751	6.88e-06	0.000124484
isogroup12556	Thioredoxin-related transmembrane protein 2-B	2e-15	8.71935	-1.62412	0.360739	-4.5022	6.73e-06	0.000122056
isogroup126	Eukaryotic translation initiation factor 4E-binding protein 2	1e-70	81.225	0.851124	0.173689	4.90027	9.57e-07	2.22e-05
isogroup1261	Calmin	3e-148	4.0632	-2.19917	0.560077	-3.92655	8.62e-05	0.00108984
isogroup12645	Deoxynucleoside triphosphate triphosphohydrolase SAMHD1	6e-14	1.11582	-2.63188	0.793994	-3.31474	0.000917292	0.00798526
isogroup12668	Lysophosphatidylcholine acyltransferase 2 (Fragment)	3e-41	22.0112	2.52235	0.294308	8.57043	1.03e-17	1.52e-15
isogroup12683	Surfactant protein B	3e-13	9.79138	2.0685	0.398255	5.19391	2.06e-07	5.74e-06
isogroup12695	Tripartite motif-containing protein 39	4e-40	77.2373	1.8318	0.254972	7.1843	6.76e-13	5.41e-11
isogroup127	Tropomyosin alpha-3 chain	3e-88	58.9595	0.940358	0.20837	4.51293	6.39e-06	0.000116792
isogroup12785	General transcription factor IIIAa	9e-10	2.37614	-2.93848	0.712504	-4.12416	3.72e-05	0.000528705
isogroup12833	Anoctamin (Fragment)	4e-08	18.3967	1.23021	0.251537	4.89077	1e-06	2.32e-05
isogroup12847	eIF3a	1e-08	2.17042	2.73797	0.592785	4.61882	3.86e-06	7.59e-05
isogroup1286	Tripartite motif-containing protein 39	4e-116	6.21433	-3.81947	0.528323	-7.22942	4.85e-13	4e-11
isogroup129	Fatty acyl-CoA hydrolase precursor medium chain	2e-136	6.27671	2.61512	0.512029	5.10737	3.27e-07	8.67e-06
isogroup1290	Organic solute transporter subunit beta	2e-64	372.951	0.890669	0.140424	6.34273	2.26e-10	1.16e-08
isogroup12969	PPUP3387 (Fragment)	4e-24	29.9157	-2.45741	0.467077	-5.26125	1.43e-07	4.13e-06
isogroup13	Insulin growth factor binding protein 4	4e-82	307.598	-1.12385	0.296023	-3.79649	0.000146761	0.00172193
isogroup13001	Mitogen-activated protein kinase kinase kinase kinase 3	3e-50	4.28573	-1.5254	0.425059	-3.58867	0.000332374	0.00342756
isogroup13068	PO21 (Fragment)	2e-16	18.364	-1.12525	0.30748	-3.65958	0.000252633	0.00271228
isogroup1308	Ependymin	6e-109	8.95102	1.46975	0.322767	4.55358	5.27e-06	9.95e-05
isogroup13090	Hepcidin	2e-45	212.093	3.6338	0.341069	10.6542	1.67e-26	6.27e-24
isogroup1318	GTP-binding protein Rheb	2e-128	11.4582	0.818085	0.249939	3.27314	0.00106359	0.0089764
isogroup1319	MA7D1	1e-52	41.1765	-1.92053	0.259471	-7.40171	1.34e-13	1.21e-11
isogroup1326	RBM5	5e-180	55.4129	1.08266	0.152767	7.08701	1.37e-12	1.04e-10
isogroup1330	Gamma-aminobutyric acid receptor-associated protein	9e-77	224.908	0.537924	0.14237	3.77836	0.000157867	0.00183475
isogroup1332	LYPA2 (Fragment)	6e-135	1.18253	-3.0905	0.655249	-4.71653	2.4e-06	5e-05
isogroup1333	Lymphocyte antigen 6D (Fragment)	3e-17	270.597	3.25188	0.361924	8.98497	2.59e-19	4.67e-17
isogroup13384	SUMO-1 (Fragment)	2e-27	83.0376	-2.47865	0.31632	-7.8359	4.66e-15	5.07e-13
isogroup134	Receptor protein-tyrosine kinase	4e-08	276.901	-0.986671	0.173713	-5.67988	1.35e-08	4.91e-07
isogroup13413	Transmembrane protein 87A (Fragment)	1e-53	4.1886	1.98046	0.465271	4.25659	2.08e-05	0.000321621
isogroup1342	Lysoplasmalogenase	6e-110	25.2344	-1.52676	0.209342	-7.29315	3.03e-13	2.6e-11
isogroup13510	Zgc:110265	2e-83	7.57075	-1.21365	0.354815	-3.4205	0.000625052	0.00582406
isogroup1353	NAD(P)H-hydrate epimerase	7e-177	18.9415	-1.89301	0.217202	-8.71545	2.9e-18	4.51e-16
isogroup13538	Chromosome 2 SCAF8387 whole genome shotgun sequence	4e-12	7.69352	-2.42057	0.572388	-4.2289	2.35e-05	0.00035617
isogroup13551	NADH-ubiquinone oxidoreductase chain 2	1e-70	21.834	-1.24179	0.319251	-3.88969	0.000100374	0.00124695
isogroup13552	NADH-ubiquinone oxidoreductase chain 2	5e-31	65.1472	-1.34505	0.232618	-5.78221	7.37e-09	2.8e-07
isogroup13569	NADH dehydrogenase 1 subunit c2 (Fragment)	2e-67	38.5962	-0.969398	0.191441	-5.0637	4.11e-07	1.06e-05
isogroup13602	Double-stranded RNA-dependent protein kinase	2e-40	3.00482	2.1211	0.618864	3.42741	0.000609364	0.00570937
isogroup1365	Mitochondrial import inner membrane translocase subunit TIM17	6e-82	36.0994	-0.984335	0.233934	-4.20775	2.58e-05	0.000386813
isogroup13726	LIM domain-containing protein ajuba	2e-128	0.713948	-2.62823	0.743852	-3.53327	0.000410458	0.00410778
isogroup1373	Vacuolar protein sorting-associated protein 33A	3e-100	10.9031	1.0705	0.261999	4.08588	4.39e-05	0.000609056
isogroup1375	Soluble FGFR2 variant 3 (Fragment)	3e-39	6.15303	1.25382	0.328083	3.82166	0.000132558	0.00157811
isogroup13773	Virus induced TRIM protein (Fragment)	2e-07	7.93314	-2.9001	0.440474	-6.58404	4.58e-11	2.66e-09
isogroup138	DnaJ homolog subfamily C member 7 homolog	3e-91	74.1359	-0.744056	0.223532	-3.32864	0.000872726	0.00766657
isogroup13813	Reverse transcriptase	5e-08	1.71022	-3.29039	0.65206	-5.04615	4.51e-07	1.15e-05
isogroup13817	ATP-binding cassette sub-family F member 3	6e-28	2.67097	-2.52694	0.719693	-3.51113	0.000446202	0.00440826
isogroup1389	Serine--pyruvate aminotransferase mitochondrial	5e-176	205.556	0.744662	0.143495	5.18947	2.11e-07	5.85e-06
isogroup13906	Nocturnin	4e-67	0.682703	-2.71201	0.809879	-3.34867	0.000812012	0.00724048
isogroup1391	C-1-tetrahydrofolate synthase cytoplasmic	2e-165	102.965	-2.41051	0.297197	-8.11081	5.03e-16	6.15e-14
isogroup1405	Leukocyte cell-derived chemotaxin-2	5e-31	11.9271	-1.87417	0.334226	-5.6075	2.05e-08	7.12e-07
isogroup14057	GRB2-associated-binding protein 1	2e-38	2.91126	1.64718	0.480705	3.4266	0.000611184	0.00571759
isogroup14079	Chitinase3	7e-12	750.301	-1.05637	0.136838	-7.71985	1.16e-14	1.19e-12
isogroup14084	Choline-phosphate cytidylyltransferase B	6e-20	16.1676	-2.40168	0.391124	-6.14046	8.23e-10	3.78e-08
isogroup141	Solute carrier family 25 member 40	5e-180	60.0187	-0.653792	0.155441	-4.20604	2.6e-05	0.000389563
isogroup142	CD82 antigen b	1e-63	7.77917	1.24729	0.331303	3.76479	0.00016669	0.00192283
isogroup14233	ADP-ribosyl cyclase 1	8e-27	0.953017	-2.96416	0.710512	-4.17186	3.02e-05	0.000443386
isogroup1425	Membrane-spanning 4-domains subfamily A member 8A	4e-75	10.2965	1.14113	0.34027	3.35362	0.000797632	0.00713082
isogroup1432	Prohibitin-2	7e-165	24.195	-0.983355	0.268593	-3.66113	0.000251109	0.0026978
isogroup1433	Malate dehydrogenase mitochondrial	1e-171	115.81	-1.81426	0.169732	-10.689	1.15e-26	4.42e-24
isogroup14339	Zinc finger protein 40	8e-37	3.40796	-2.29427	0.575461	-3.98684	6.7e-05	0.000879696
isogroup14363	Coronin	3e-27	10.9592	-1.73944	0.329125	-5.28504	1.26e-07	3.68e-06
isogroup14392	Claudin (Fragment)	2e-50	49.784	-3.20466	0.445433	-7.19448	6.27e-13	5.07e-11
isogroup14458	Protein SERAC1	2e-41	24.1603	-0.820763	0.200679	-4.08992	4.32e-05	0.000599615
isogroup14521	Phosphoinositide-3-kinase regulatory subunit 1 (Alpha)	2e-74	1.14392	-3.05307	0.817762	-3.73345	0.000188875	0.00212858
isogroup1453	Alpha-1-antitrypsin	4e-136	223.227	-0.838714	0.241737	-3.46953	0.000521373	0.00503792
isogroup1454	Cholesteryl ester transfer protein (Fragment)	2e-57	11.1975	-2.73148	0.360372	-7.57962	3.47e-14	3.33e-12
isogroup14558	IHABP	9e-48	30.1049	-2.9611	0.453363	-6.5314	6.52e-11	3.67e-09
isogroup14621	ZFP36 ring finger protein 1 (Fragment)	1e-43	5.20742	4.62868	0.658358	7.03064	2.06e-12	1.52e-10
isogroup14631	Catenin delta-1	2e-25	6.07905	-1.39171	0.424184	-3.28091	0.00103471	0.00878048
isogroup14655	Heat shock protein 4 (Fragment)	3e-24	7.95744	-1.49026	0.404543	-3.68381	0.000229773	0.00250878
isogroup1467	Butyrophilin subfamily 2 member A2	3e-112	27.9731	-1.18305	0.275984	-4.28667	1.81e-05	0.000286197
isogroup14711	Fc of IgE high affinity I receptor for gamma polypeptide (Fragment)	8e-10	11.0742	1.20601	0.310227	3.88752	0.000101272	0.00125709
isogroup1473	Hepatocellular carcinoma-associated protein TD26	8e-64	15.9698	-4.4887	0.67864	-6.61426	3.73e-11	2.21e-09
isogroup14731	NFIX (Fragment)	5e-62	50.2461	1.23352	0.268367	4.59638	4.3e-06	8.33e-05
isogroup14768	PPUP6722 (Fragment)	5e-11	6.92461	1.5554	0.438899	3.54386	0.000394308	0.00397159
isogroup148	Membrane-associated progesterone receptor component 1	3e-90	187.858	0.554111	0.105116	5.27142	1.35e-07	3.95e-06
isogroup1484	Chromosome 11 SCAF14979 whole genome shotgun sequence	1e-117	74.9433	-1.11477	0.141121	-7.89936	2.8e-15	3.15e-13
isogroup14877	Zinc finger protein 670	2e-44	1.1271	-3.16776	0.757034	-4.18444	2.86e-05	0.000422969
isogroup14893	Nuclear receptor subfamily 5 group A member 2 (Fragment)	4e-51	9.13371	-1.52675	0.408598	-3.73655	0.000186561	0.00210705
isogroup1491	Phospholipase A1 member A	4e-98	98.3335	-2.09451	0.184204	-11.3706	5.86e-30	3.28e-27
isogroup14920	Arrestin red cell isoform 2	6e-54	2.62103	-2.38071	0.564902	-4.21438	2.5e-05	0.000377093
isogroup1494	Cyclic AMP phosphoprotein	1e-63	8.27692	-1.85805	0.342438	-5.42596	5.76e-08	1.82e-06
isogroup1495	Syndecan	2e-76	2.60626	-2.28224	0.616484	-3.70203	0.00021388	0.00236202
isogroup1504	Choline/ethanolamine kinase	6e-152	32.5161	-2.20416	0.547671	-4.02461	5.71e-05	0.000766089
isogroup1507	Coagulation factor X	2e-134	1069.33	-1.29942	0.131585	-9.87517	5.33e-23	1.38e-20
isogroup15087	LDL receptor (Fragment)	5e-19	1.53221	-2.25621	0.683383	-3.30153	0.000961592	0.00830292
isogroup15113	Chromosome 2 SCAF15010 whole genome shotgun sequence (Fragment)	1e-49	5.83146	-1.9638	0.474157	-4.14167	3.45e-05	0.000496554
isogroup15159	C209E (Fragment)	1e-38	3.65353	2.95397	0.545598	5.41418	6.16e-08	1.93e-06
isogroup1517	3-oxo-5-beta-steroid 4-dehydrogenase	1e-79	222.037	1.43	0.212008	6.74502	1.53e-11	9.59e-10
isogroup1521	Purine nucleoside phosphorylase	6e-138	1175.7	-2.68988	0.58137	-4.6268	3.71e-06	7.34e-05
isogroup15258	Cystinosin	6e-19	1.21164	-3.61618	0.717608	-5.03922	4.67e-07	1.19e-05
isogroup15268	Protein NLRC3	3e-84	2.30321	-1.76681	0.483855	-3.65153	0.000260683	0.00278513
isogroup1530	D-dopachrome tautomerase	7e-68	73.9888	-2.22923	0.202386	-11.0148	3.24e-28	1.45e-25
isogroup1533	SWI/SNF-related matrix-associated actin-dependent regulator of chromatin subfamily E member 1-related	5e-142	18.285	0.983913	0.272953	3.6047	0.000312513	0.00325431
isogroup15354	Solute carrier family 27 member 2	1e-76	1.31145	-2.60605	0.799815	-3.25831	0.00112076	0.00936773
isogroup1539	Lactose-binding lectin l-2	9e-14	42.997	-5.85869	0.576268	-10.1666	2.79e-24	8.62e-22
isogroup15390	RL35A	9e-72	2499.5	-0.481703	0.1224	-3.93549	8.3e-05	0.00105743
isogroup15457	Neutral amino acid transporter 2	5e-81	2.60859	-3.41376	0.619954	-5.50648	3.66e-08	1.2e-06
isogroup1546	Yghl1	9e-47	29.5261	-2.57447	0.405243	-6.3529	2.11e-10	1.09e-08
isogroup15521	COP9 signalosome complex subunit 5	4e-47	16.8769	0.949449	0.206198	4.60455	4.13e-06	8.06e-05
isogroup1558	PTGES	6e-85	12.1226	-1.0136	0.294962	-3.43637	0.000589555	0.00557105
isogroup15586	Pleiotropic regulator 1	3e-59	1.51002	-3.87117	0.714691	-5.41657	6.08e-08	1.91e-06
isogroup1559	Mitochondrial fission factor protein B	2e-133	7.23915	2.21127	0.39959	5.53385	3.13e-08	1.05e-06
isogroup15647	Cutaneous T-cell lymphoma-associated antigen 5	6e-08	37.6573	-1.44054	0.264172	-5.45301	4.95e-08	1.58e-06
isogroup1565	Glutathione peroxidase	8e-106	49.7291	-1.5774	0.197218	-7.99828	1.26e-15	1.47e-13
isogroup15650	Claudin	1e-65	7.59609	2.49159	0.442888	5.62578	1.85e-08	6.53e-07
isogroup157	Acyl-coenzyme A thioesterase 4	2e-51	260.946	4.88871	0.246806	19.8079	2.54e-87	1.12e-83
isogroup15709	PolyA-binding protein cytoplasmic 1b (Fragment)	1e-37	11.9952	-2.22947	0.296147	-7.52826	5.14e-14	4.83e-12
isogroup15710	Protein BTG1 (Fragment)	2e-29	12.767	2.3169	0.584697	3.96256	7.41e-05	0.000958228
isogroup15729	CGG triplet repeat-binding protein 1 (Fragment)	2e-11	3.7789	-3.17406	0.669908	-4.73805	2.16e-06	4.58e-05
isogroup1575	Agrin (Fragment)	9e-34	199.67	-0.614846	0.147734	-4.16184	3.16e-05	0.000460684
isogroup15757	Apolipoprotein L3	7e-60	24.7719	2.17193	0.402057	5.40204	6.59e-08	2.05e-06
isogroup1580	Arginase	1e-180	101.504	-1.52291	0.321542	-4.73627	2.18e-06	4.62e-05
isogroup1581	Cytochrome c oxidase subunit 4 isoform 2 mitochondrial	9e-76	630.365	0.497283	0.116853	4.25565	2.08e-05	0.000322812
isogroup15908	Pentaxin	1e-51	97.9169	2.64499	0.593457	4.45691	8.31e-06	0.000146419
isogroup15962	CCR4-NOT transcription complex subunit 7	4e-68	5.9177	1.46025	0.424524	3.43972	0.000582307	0.00551608
isogroup15968	Chromosome 16 SCAF14974 whole genome shotgun sequence (Fragment)	2e-60	33.4524	-0.663016	0.192108	-3.45126	0.000557968	0.00533304
isogroup16	GLGB (Fragment)	1e-25	80.6438	-1.2131	0.183619	-6.60664	3.93e-11	2.32e-09
isogroup160	Chromosome 9 SCAF14710 whole genome shotgun sequence (Fragment)	9e-121	15.9534	-1.67996	0.314208	-5.34666	8.96e-08	2.7e-06
isogroup1603	Syntaxin-4 (Fragment)	9e-176	10.6013	-1.92687	0.380458	-5.06462	4.09e-07	1.06e-05
isogroup1608	Tribbles homolog 1	1e-30	16.3999	-2.05185	0.491296	-4.1764	2.96e-05	0.000436925
isogroup16092	ADP/ATP translocase 3	2e-78	1.72634	-3.40991	0.627788	-5.43163	5.58e-08	1.77e-06
isogroup1618	Malate synthase A MSA domain-containing protein	2e-119	120.069	0.787414	0.16946	4.64659	3.37e-06	6.77e-05
isogroup16183	Complement component C3	6e-88	5.24346	3.2307	0.419071	7.70919	1.27e-14	1.28e-12
isogroup16191	Inactive serine protease PAMR1	4e-15	3.52767	-1.89778	0.505102	-3.75721	0.000171817	0.00196944
isogroup16222	FAM32A	2e-45	51.4652	0.644794	0.15906	4.05379	5.04e-05	0.000690916
isogroup16224	Ectonucleotide pyrophosphatase/phosphodiesterase family member 1	6e-42	10.9421	1.10897	0.324888	3.4134	0.000641576	0.00595316
isogroup1626	Diablo mitochondrial	1e-142	157.049	-2.39194	0.602979	-3.96688	7.28e-05	0.000944225
isogroup16291	Stonustoxin subunit alpha	7e-14	2.81842	-1.94065	0.471922	-4.11224	3.92e-05	0.000552961
isogroup163	Leucine-rich repeat-containing protein 17	6e-106	146.732	-0.876551	0.209564	-4.18274	2.88e-05	0.000425729
isogroup16372	Cand1 protein (Fragment)	2e-64	1.88895	-3.32206	0.702142	-4.73132	2.23e-06	4.71e-05
isogroup1642	Retinoic acid receptor responder 3	4e-82	81.2129	-1.2637	0.225264	-5.60986	2.02e-08	7.05e-07
isogroup16540	Serine/arginine-rich-splicing factor 11	7e-52	6.36327	-3.97946	0.511885	-7.77413	7.6e-15	7.97e-13
isogroup1656	General transcription factor 3C polypeptide 6	7e-68	5.52818	1.45446	0.383124	3.79632	0.000146861	0.00172245
isogroup16570	ZADH2	4e-39	7.06873	-1.30418	0.385115	-3.38648	0.00070795	0.00646017
isogroup166	Nucleoside diphosphate kinase	1e-106	345.023	1.01388	0.310897	3.26115	0.0011096	0.00929714
isogroup16603	Transmembrane protein 60	6e-81	7.32102	-2.38676	0.485101	-4.92012	8.65e-07	2.04e-05
isogroup1669	C-C motif chemokine 25	5e-37	14.4384	-4.97496	0.463008	-10.7449	6.26e-27	2.44e-24
isogroup16729	Histone-lysine N-methyltransferase	4e-10	4.69209	-2.42888	0.418999	-5.79687	6.76e-09	2.58e-07
isogroup16731	Bifunctional protein (Fragment)	3e-46	7.52187	-2.23415	0.439212	-5.08672	3.64e-07	9.54e-06
isogroup1674	Pyruvate carboxylase (Fragment)	1e-15	16.3942	1.06902	0.252769	4.22923	2.34e-05	0.000355829
isogroup16746	Nitric oxide synthase 1 (Neuronal) adaptor protein a (Fragment)	9e-66	11.6089	-1.74456	0.309865	-5.63007	1.8e-08	6.39e-07
isogroup1675	Glyoxylate reductase/hydroxypyruvate reductase	8e-129	365.735	0.56834	0.150419	3.77838	0.000157849	0.00183475
isogroup1679	Interleukin-8 protein	3e-32	246.719	-1.9718	0.217422	-9.06901	1.2e-19	2.26e-17
isogroup168	Dihydropyrimidinase-related protein 2	2e-153	65.2561	-1.30183	0.216513	-6.0127	1.82e-09	7.84e-08
isogroup16830	Rho-related GTP-binding protein RhoB	7e-58	1.26795	3.1118	0.708448	4.39241	1.12e-05	0.000190021
isogroup16977	Solute carrier family 25 member 42	2e-23	3.84299	1.62551	0.491327	3.30841	0.000938272	0.00813303
isogroup17074	Polyubiquitin (Fragment)	3e-67	1.01078	-2.30267	0.698623	-3.29602	0.000980654	0.0084274
isogroup1718	Butyrophilin subfamily 1 member A1	2e-13	1.72	-2.90587	0.801376	-3.6261	0.000287734	0.00303108
isogroup172	Uridine phosphorylase 2	9e-159	645.581	-1.04728	0.237616	-4.40745	1.05e-05	0.000178673
isogroup1722	Cutaneous T-cell lymphoma-associated antigen 5	3e-09	51.693	-0.814756	0.203083	-4.01193	6.02e-05	0.0008011
isogroup173	Probable methylmalonate-semialdehyde dehydrogenase [acylating] mitochondrial	1e-168	32.4229	-1.01807	0.225389	-4.51697	6.27e-06	0.000114927
isogroup1734	Exostosin-2	5e-38	2.29035	-2.97481	0.591459	-5.02961	4.91e-07	1.24e-05
isogroup1738	RBP4	3e-118	675.941	-2.34443	0.267393	-8.76773	1.82e-18	2.9e-16
isogroup174	Proteasome subunit beta type	1e-179	130.284	0.73932	0.130305	5.67378	1.4e-08	5.08e-07
isogroup17412	Carboxypeptidase A	1e-91	5.70596	1.66203	0.49499	3.35769	0.000785959	0.0070428
isogroup17469	Metalloendopeptidase (Fragment)	3e-20	10.2552	-4.55419	0.632954	-7.19514	6.24e-13	5.06e-11
isogroup17480	RNA polymerase II subunit A C-terminal domain phosphatase SSU72	7e-08	2.02963	-2.06371	0.583482	-3.53688	0.000404882	0.00405988
isogroup17529	Histidine-rich glycoprotein putative	1e-29	352.087	-0.850519	0.249114	-3.41417	0.000639756	0.00593985
isogroup1756	Proactivator polypeptide (Fragment)	2e-116	34.6757	1.09784	0.260647	4.21198	2.53e-05	0.000380572
isogroup176	Adenosine kinase 2	3e-133	708.146	-0.655513	0.137221	-4.77705	1.78e-06	3.87e-05
isogroup17628	Sialic acid-binding Ig lectin 8 protein	1e-11	4.39016	4.0568	0.770274	5.26669	1.39e-07	4.03e-06
isogroup1764	Ammonium transporter Rh type B-B	2e-125	46.9846	-2.79444	0.394166	-7.0895	1.35e-12	1.02e-10
isogroup17710	C-type lectin domain family 4 member C	1e-11	2.69691	2.48938	0.579288	4.2973	1.73e-05	0.000274447
isogroup17721	TC1 transposase	7e-107	1.84458	-3.42823	0.658621	-5.20516	1.94e-07	5.44e-06
isogroup17854	Abhydrolase domain-containing protein 16A	1e-34	3.8279	-1.44891	0.443473	-3.26719	0.0010862	0.00913831
isogroup18	Hepatic leukemia factor	1e-159	76.2396	-2.58068	0.602468	-4.28351	1.84e-05	0.000289705
isogroup180	Carboxylic ester hydrolase	3e-144	38.6972	1.89747	0.388091	4.88925	1.01e-06	2.33e-05
isogroup18004	Ubiquitin-conjugating enzyme E2 H	4e-26	21.0015	3.62962	0.511307	7.09872	1.26e-12	9.71e-11
isogroup18005	Oxysterol-binding protein	1e-17	1.90451	1.92642	0.540444	3.5645	0.000364544	0.00371951
isogroup1802	Smg-6 homolog nonsense mediated mRNA decay factor	1e-83	17.0194	0.956215	0.241136	3.96546	7.33e-05	0.00094785
isogroup18067	Alpha-2-macroglobulin	9e-07	6.58787	-2.5601	0.591236	-4.33007	1.49e-05	0.000240634
isogroup18068	Isochorismatase domain-containing protein 2 mitochondrial	3e-22	44.2654	2.11452	0.313709	6.74039	1.58e-11	9.86e-10
isogroup1807	Tetraspanin	5e-115	113.952	-0.978631	0.184345	-5.3087	1.1e-07	3.27e-06
isogroup18096	Neural proliferation differentiation and control1	2e-40	1.20083	2.27605	0.682938	3.33273	0.000859981	0.00757619
isogroup18202	Kininogen 1	4e-47	8.59992	-0.937623	0.282912	-3.31418	0.000919112	0.00799604
isogroup1825	Hemicentin-1	1e-89	31.3163	-1.1571	0.230261	-5.02514	5.03e-07	1.27e-05
isogroup18267	Acyl-CoA dehydrogenase family member 11	9e-44	33.802	1.05815	0.192512	5.49656	3.87e-08	1.26e-06
isogroup1834	p33MX	9e-30	34.9224	-1.29357	0.384116	-3.36764	0.000758148	0.00684932
isogroup18346	E3 ubiquitin-protein ligase DTX3L	5e-12	4.51077	1.57563	0.458451	3.43686	0.000588492	0.00556271
isogroup18353	Vacuolar protein sorting-associated protein 37A	5e-57	7.95779	1.21141	0.355293	3.40962	0.00065053	0.00602356
isogroup18358	Abnormal spindle microcephaly-associated protein	2e-27	34.7798	-5.11352	0.371743	-13.7555	4.72e-43	4.85e-40
isogroup18389	Receptor protein serine/threonine kinase	6e-23	13.2727	-1.16628	0.291786	-3.99703	6.41e-05	0.000846996
isogroup18390	Tyrosine-protein phosphatase non-receptor type	1e-23	15.8747	-1.6308	0.41412	-3.93798	8.22e-05	0.00104955
isogroup18413	DeltaC (Fragment)	2e-06	15.7741	-1.77354	0.375381	-4.72465	2.31e-06	4.85e-05
isogroup1843	Glutathione S-transferase theta-1	3e-146	1685.11	0.916262	0.176639	5.1872	2.13e-07	5.9e-06
isogroup18444	Nuclear fragile X mental retardation-interacting protein 1	5e-16	6.3255	-1.59815	0.458571	-3.48507	0.000492003	0.00479773
isogroup18506	UDP-glucose 6-dehydrogenase (Fragment)	3e-31	4.29616	-1.99464	0.419522	-4.75455	1.99e-06	4.27e-05
isogroup18515	Cytochrome P450 2K1	2e-31	51.9648	-7.9583	0.559971	-14.212	7.72e-46	9.15e-43
isogroup1852	MTHR (Fragment)	3e-57	19.5619	1.78413	0.390165	4.57274	4.81e-06	9.22e-05
isogroup18522	Delta 4 (Fragment)	1e-60	8.7757	-1.56806	0.366333	-4.28041	1.87e-05	0.000293321
isogroup186	ERBB receptor feedback inhibitor 1	6e-116	138.598	-1.61566	0.371223	-4.35226	1.35e-05	0.000220638
isogroup1865	Chromosome 7 open reading frame 50	9e-54	9.66344	1.37781	0.379637	3.62928	0.000284216	0.0030012
isogroup1875	Elastin microfibril interfacer 1 (Fragment)	2e-14	50.3739	-0.749744	0.168825	-4.44095	8.96e-06	0.000155931
isogroup18815	Protein ABHD18	3e-86	0.795077	2.42444	0.719665	3.36884	0.000754843	0.00682171
isogroup18821	Histidine triad nucleotide-binding protein 3	3e-31	2.0096	-2.04069	0.556698	-3.6657	0.000246661	0.00265783
isogroup1884	UNC50 (Fragment)	4e-174	14.6918	0.728898	0.215848	3.3769	0.000733068	0.00665197
isogroup18860	DNA-directed RNA polymerase II subunit RPB11-a	3e-79	24.2955	1.28879	0.187942	6.85738	7.01e-12	4.72e-10
isogroup18862	Essential MCU regulator mitochondrial	4e-24	25.268	1.20162	0.184458	6.51437	7.3e-11	4.06e-09
isogroup1892	Solute carrier family 25 member 38	2e-115	16.1023	-2.76743	0.620432	-4.46049	8.18e-06	0.000144655
isogroup18920	TRDMT (Fragment)	4e-27	2.8337	3.3256	0.564365	5.89264	3.8e-09	1.53e-07
isogroup18949	TRAF family member-associated NF-kappa-B activator	3e-06	3.80071	-2.37232	0.539922	-4.39381	1.11e-05	0.00018901
isogroup1897	Thioredoxin domain-containing protein 9	3e-118	8.07891	-1.18462	0.310745	-3.8122	0.000137736	0.00163334
isogroup19	A33 (Fragment)	2e-153	2972.81	-1.66449	0.269807	-6.16918	6.86e-10	3.22e-08
isogroup19030	FIg-Hepta	4e-55	1.62303	-3.48683	0.649028	-5.37239	7.77e-08	2.38e-06
isogroup19075	Guanine nucleotide-binding protein subunit alpha-13	2e-98	1.67772	2.09163	0.643112	3.25235	0.00114455	0.00951497
isogroup19142	Phosphatidylinositol 4-kinase type 2-beta (Fragment)	2e-29	1.33343	-3.02149	0.675309	-4.47424	7.67e-06	0.000137311
isogroup192	Chromosome 5 SCAF10152 whole genome shotgun sequence	2e-41	91.4221	-0.52878	0.154655	-3.4191	0.000628293	0.00584927
isogroup1924	Probable proline dehydrogenase 2	1e-172	75.2832	-0.965887	0.258772	-3.73258	0.00018953	0.00213439
isogroup1935	PAPS1	2e-107	128.711	1.52288	0.277268	5.49244	3.96e-08	1.29e-06
isogroup1936	Golgin A4	3e-163	7.75055	0.993497	0.292263	3.39933	0.000675518	0.00620771
isogroup19386	Si:ch211-119d14.3	2e-08	15.9486	2.26985	0.236006	9.61775	6.73e-22	1.55e-19
isogroup19410	AFAD	2e-37	16.0966	1.44317	0.220513	6.54459	5.97e-11	3.41e-09
isogroup1942	Redox-regulatory protein FAM213A	8e-64	127.815	-1.10451	0.260231	-4.24434	2.19e-05	0.000336656
isogroup1946	TPM4	4e-86	26.9399	1.09302	0.238284	4.58707	4.5e-06	8.67e-05
isogroup19568	Pleckstrin domain-containing family F member 1	5e-93	1.82064	2.83001	0.730302	3.87512	0.000106572	0.00131355
isogroup19653	BMS1	3e-45	3.63081	-3.31852	0.658747	-5.03763	4.71e-07	1.2e-05
isogroup1966	Inorganic pyrophosphatase	3e-148	76.857	-0.857654	0.2396	-3.57952	0.000344226	0.00353913
isogroup1967	Argininosuccinate lyase	4e-171	3.79003	-4.1184	0.64302	-6.40477	1.51e-10	7.94e-09
isogroup1970	Acyl-coenzyme A thioesterase 2 mitochondrial	7e-49	2.83167	-2.84697	0.568388	-5.00885	5.48e-07	1.36e-05
isogroup19749	Periaxin (Fragment)	2e-38	1.66118	-2.37685	0.652797	-3.64102	0.000271564	0.00288693
isogroup19785	C-C motif chemokine	1e-30	3.33444	3.40583	0.641483	5.3093	1.1e-07	3.26e-06
isogroup19789	Transmembrane emp24 domain-containing protein 1	2e-37	9.76283	1.9935	0.573942	3.47334	0.000514024	0.00497627
isogroup19808	CUGBP Elav family member 5 (Fragment)	8e-42	6.24689	-5.4865	0.598435	-9.16809	4.81e-20	9.22e-18
isogroup19949	Ribonuclease kappa-A	1e-47	1.97686	3.79287	0.734048	5.16705	2.38e-07	6.46e-06
isogroup200	NADPH--cytochrome P450 reductase (Fragments)	4e-180	87.4848	-3.73029	0.257662	-14.4774	1.68e-47	2.26e-44
isogroup2006	Crystallin J1B	1e-54	214.395	-2.68552	0.237934	-11.2868	1.52e-29	7.97e-27
isogroup2013	Prostaglandin reductase 1	1e-133	24.4695	-0.799929	0.247144	-3.23669	0.00120926	0.00996428
isogroup20157	Fibronectin	2e-06	2.788	-3.36848	0.701082	-4.80469	1.55e-06	3.42e-05
isogroup2017	Down syndrome critical region protein 3 homolog	3e-174	7.72277	1.2969	0.296408	4.3754	1.21e-05	0.00020246
isogroup2019	BCL2/adenovirus E1B protein-interacting protein 3	4e-119	73.0153	0.438468	0.133738	3.27855	0.00104342	0.00883467
isogroup20195	Hydroxyacyl-thioester dehydratase type 2 mitochondrial	4e-26	22.3547	-1.58449	0.205243	-7.72009	1.16e-14	1.19e-12
isogroup2024	Cytochrome P450 CYP2N	5e-158	6.37559	-2.19098	0.469511	-4.66651	3.06e-06	6.24e-05
isogroup20242	MHD domain-containing death-inducing protein	2e-53	3.97001	1.55836	0.427082	3.64885	0.000263416	0.0028119
isogroup20278	Abl interactor 1	2e-49	25.1687	-2.57775	0.220613	-11.6845	1.53e-31	9.25e-29
isogroup20285	Ankyrin repeat and protein kinase domain-containing protein 1	3e-14	7.97211	2.42169	0.355882	6.80476	1.01e-11	6.56e-10
isogroup2038	Transmembrane emp24 domain trafficking protein 2	2e-129	14.4712	-1.47335	0.280086	-5.26037	1.44e-07	4.14e-06
isogroup20398	Complement factor H-related protein 1	1e-31	18.8192	-3.00467	0.369095	-8.14063	3.93e-16	4.87e-14
isogroup20440	Serum lectin isoform 2	2e-28	2.27126	-3.14113	0.950697	-3.30403	0.000953056	0.00823614
isogroup2046	Ras association (RalGDS/AF-6) domain family 1	4e-165	1.36096	-2.30843	0.610377	-3.78198	0.000155589	0.00181308
isogroup2056	Kelch 32 (Fragment)	2e-37	7.93452	1.21555	0.301684	4.02922	5.6e-05	0.000753519
isogroup2058	IF4G1 (Fragment)	7e-156	15.7174	-1.4348	0.356686	-4.0226	5.76e-05	0.000772326
isogroup206	Metalloendopeptidase	4e-09	447.634	-0.723125	0.216745	-3.33629	0.000849031	0.00749901
isogroup2064	Solute carrier family 22 member 6	3e-162	121.797	-1.13891	0.27398	-4.15691	3.23e-05	0.000468736
isogroup2080	Carbonyl reductase 20beta-hydroxysteroid dehydrogenase	7e-170	137.139	-0.644939	0.144424	-4.4656	7.98e-06	0.000142141
isogroup2082	C2orf25 homolog mitochondrial	2e-160	31.0477	1.65865	0.211884	7.8281	4.95e-15	5.36e-13
isogroup20823	Angiopoietin 3	2e-78	4.26157	2.37145	0.665983	3.56083	0.000369687	0.00376699
isogroup2090	Alpha-2-macroglobulin	2e-120	39.6783	-2.0791	0.284146	-7.31699	2.54e-13	2.19e-11
isogroup2097	Intelectin-1a	4e-175	222.112	-2.11358	0.294118	-7.18617	6.66e-13	5.36e-11
isogroup2099	CC115	1e-76	10.0134	2.50621	0.318882	7.85936	3.86e-15	4.28e-13
isogroup21	Beta-ureidopropionase	2e-178	128.342	-0.670955	0.192293	-3.48923	0.000484418	0.00473725
isogroup21073	Chloride intracellular channel protein	2e-48	12.1082	1.42521	0.344324	4.13915	3.49e-05	0.000501565
isogroup2116	Putative signal peptidase complex subunit 2	2e-133	15.0792	0.936375	0.275553	3.39817	0.000678393	0.00621806
isogroup21160	von Willebrand factor A domain-containing protein 5A	1e-32	6.19721	-2.26418	0.499061	-4.53687	5.71e-06	0.000106308
isogroup21199	DDE superfamily endonuclease (Fragment)	4e-36	3.88854	-3.79693	0.723982	-5.24451	1.57e-07	4.48e-06
isogroup212	Solute carrier family 2 facilitated glucose transporter member 2	1e-180	228.226	-0.541561	0.130405	-4.15293	3.28e-05	0.000475396
isogroup2121	ATP-binding cassette sub-family F member 2	2e-153	4.73775	-2.33742	0.709136	-3.29615	0.000980191	0.00842576
isogroup2123	Ovarian tumor suppressor candidate 2	1e-130	18.9812	-0.756613	0.186496	-4.057	4.97e-05	0.000682412
isogroup2126	GTPase IMAP family member 4	9e-50	149.086	-0.886122	0.180443	-4.91081	9.07e-07	2.12e-05
isogroup213	AKAP2 (Fragment)	5e-51	83.5577	-0.854216	0.17824	-4.79252	1.65e-06	3.61e-05
isogroup21339	Complement C3	8e-75	11.9234	1.42151	0.415996	3.41711	0.000632888	0.0058885
isogroup21349	IgM heavy chain transmembrane form	1e-44	24.4981	-3.21704	0.557082	-5.7748	7.7e-09	2.91e-07
isogroup21356	C-type lectin	7e-12	4.82327	3.13811	0.705303	4.44931	8.61e-06	0.000150803
isogroup2136	Eukaryotic initiation factor 4A-II	1e-138	92.6926	-0.822169	0.242226	-3.39423	0.000688227	0.00629884
isogroup21428	Solute carrier family 44 member 2	1e-51	9.66972	-3.11764	0.460235	-6.77401	1.25e-11	7.98e-10
isogroup21432	ATP-dependent DNA helicase	4e-15	11.3442	-2.46499	0.632588	-3.89667	9.75e-05	0.00121594
isogroup2144	Probable thiopurine S-methyltransferase	4e-150	133.396	-2.0516	0.300475	-6.82784	8.62e-12	5.67e-10
isogroup21443	Lymphocyte antigen 6D (Fragment)	4e-21	23.3275	-3.50928	0.582027	-6.02941	1.65e-09	7.09e-08
isogroup2155	AMBP	2e-72	257.093	-1.36129	0.226701	-6.00478	1.92e-09	8.18e-08
isogroup21588	Nibrin	4e-08	3.53755	1.91638	0.473769	4.04498	5.23e-05	0.000712046
isogroup21801	TLK2 (Fragment)	9e-53	1.7221	-2.05182	0.613595	-3.34394	0.000825974	0.00734495
isogroup21901	Solute carrier family 6 (Neurotransmitter transporter taurine) member 6a (Fragment)	6e-63	3.43096	-2.28393	0.502814	-4.5423	5.56e-06	0.000104044
isogroup2192	CD2 antigen cytoplasmic tail-binding protein 2	2e-157	19.922	1.06834	0.260347	4.10353	4.07e-05	0.000571832
isogroup2197	Corticosteroid-binding globulin	1e-105	125.596	-0.652788	0.137914	-4.73329	2.21e-06	4.68e-05
isogroup2202	Apolipoprotein A-I	5e-114	41153.7	-0.605533	0.129726	-4.66778	3.04e-06	6.21e-05
isogroup22109	AP2A1	3e-88	3.97659	2.97099	0.491656	6.04282	1.51e-09	6.59e-08
isogroup2218	Chromosome 6 open reading frame 62	2e-155	3.08457	2.16867	0.539382	4.02067	5.8e-05	0.000777664
isogroup22194	Coiled-coil domain-containing protein 12	2e-63	8.71758	1.31925	0.365929	3.6052	0.00031191	0.00324919
isogroup22259	Chromosome 6 open reading frame 136	5e-70	1.66974	3.60274	0.86455	4.16718	3.08e-05	0.00045194
isogroup22349	Colorectal mutant cancer protein	1e-49	0.700694	2.58255	0.74825	3.45146	0.000557568	0.00533087
isogroup22524	Spastin	1e-30	1.34152	2.93243	0.756372	3.87697	0.000105766	0.00130499
isogroup2254	Eukaryotic translation initiation factor 3 subunit A	5e-15	62.9333	-0.636614	0.185502	-3.43184	0.000599499	0.00565196
isogroup2260	Retinol dehydrogenase 3	8e-110	294.578	-1.17446	0.208481	-5.63345	1.77e-08	6.29e-07
isogroup2267	UDP-N-acetylhexosamine pyrophosphorylase 1 protein	8e-104	15.2734	-1.12926	0.230983	-4.88894	1.01e-06	2.33e-05
isogroup2280	3-hydroxybutyrate dehydrogenase type 2	6e-140	30.3694	1.16975	0.224523	5.20992	1.89e-07	5.32e-06
isogroup2282	ZMAT5	3e-85	1.1795	2.53465	0.758296	3.34256	0.000830102	0.00736602
isogroup230	UDP-glucuronosyltransferase 2A1	3e-135	43.8852	-3.90884	0.402403	-9.71373	2.64e-22	6.3e-20
isogroup23018	Leucine-rich repeat-containing protein 40	2e-28	2.73307	1.64211	0.466313	3.52147	0.000429163	0.00426391
isogroup23020	Oxysterol-binding protein	1e-25	2.27278	-2.33988	0.583609	-4.00932	6.09e-05	0.000807817
isogroup23057	GDNF family receptor alpha-1	3e-73	3.83615	-1.99541	0.539995	-3.69524	0.000219682	0.00241486
isogroup23072	C2 domain-containing protein	2e-53	66.674	1.44399	0.407756	3.5413	0.000398161	0.0040029
isogroup23287	Chromosome 19 SCAF15051 whole genome shotgun sequence	3e-64	7.40411	-1.59324	0.314086	-5.07264	3.92e-07	1.02e-05
isogroup23312	Complement C3	4e-24	5.10208	-2.03996	0.55311	-3.68817	0.000225869	0.00247141
isogroup23319	Protein strawberry notch	2e-08	9.00317	-1.63508	0.34456	-4.74542	2.08e-06	4.44e-05
isogroup23329	Chymotrypsin B (Fragment)	2e-86	2389.62	2.52204	0.402182	6.27087	3.59e-10	1.77e-08
isogroup23390	Protein SPT2 homolog	2e-30	6.9501	-2.32976	0.376515	-6.18771	6.1e-10	2.88e-08
isogroup234	Fetuin-B (Fragment)	4e-170	111.716	-0.823619	0.212036	-3.88434	0.00010261	0.00127267
isogroup2344	Serum lectin isoform 3	4e-62	190.537	-6.9009	0.485786	-14.2056	8.45e-46	9.65e-43
isogroup2350	Protein jagunal	5e-123	16.4161	-1.62841	0.274515	-5.93197	2.99e-09	1.23e-07
isogroup23514	UNC93 protein MFSD11	2e-37	7.78144	-1.97819	0.610222	-3.24176	0.00118795	0.00981754
isogroup23603	LMBR1 domain containing 2a	8e-36	2.52096	-2.7043	0.593483	-4.55667	5.2e-06	9.81e-05
isogroup2367	Eva1	3e-26	892.707	-2.90186	0.420769	-6.89656	5.33e-12	3.68e-10
isogroup23865	Retinoic acid receptor RXR-beta-A	1e-50	17.1406	-2.39775	0.302522	-7.92588	2.27e-15	2.56e-13
isogroup2394	Kinase	8e-129	8.33942	1.05127	0.311858	3.371	0.000748967	0.00677829
isogroup23960	Large neutral amino acids transporter small subunit 4	9e-09	6.06227	1.67089	0.407702	4.0983	4.16e-05	0.000581203
isogroup24	Nuclear receptor subfamily 5 group A member 2	4e-158	37.8709	-0.777669	0.21091	-3.68721	0.000226729	0.00247994
isogroup2400	Hemicentin-1	1e-163	5.81344	-1.75602	0.388106	-4.5246	6.05e-06	0.000111521
isogroup24054	Dolichyldiphosphatase 1	6e-29	4.19418	1.85377	0.557255	3.32661	0.000879086	0.00770487
isogroup2407	FYVE and coiled-coil domain-containing protein 1	6e-112	17.794	1.01815	0.269059	3.78411	0.000154262	0.00180079
isogroup2414	NLTP	6e-86	101.579	1.09156	0.207865	5.2513	1.51e-07	4.34e-06
isogroup2420	FZD8 (Fragment)	8e-146	59.1059	1.34131	0.311714	4.30301	1.68e-05	0.000268212
isogroup24259	CHCH domain-containing protein C22orf16 mitochondrial	3e-21	80.0846	-1.48429	0.237953	-6.23772	4.44e-10	2.15e-08
isogroup2429	Ependymin (Fragment)	4e-57	212.859	1.10022	0.233303	4.71583	2.41e-06	5.01e-05
isogroup24404	Claudin	2e-31	3.29424	3.01921	0.6138	4.91887	8.7e-07	2.05e-05
isogroup2444	Ubiquitin modifier-activating enzyme ATG7 protein (Fragment)	3e-122	4.16087	1.66992	0.424712	3.9319	8.43e-05	0.00107028
isogroup2458	Translocon-associated protein subunit delta	6e-113	160.289	-0.58151	0.147746	-3.93588	8.29e-05	0.00105617
isogroup24646	TERF1-interacting nuclear factor 2	1e-09	3.67706	2.11813	0.497408	4.25834	2.06e-05	0.000319918
isogroup2465	AQP1	8e-176	44.2838	2.16167	0.328066	6.58912	4.42e-11	2.58e-09
isogroup247	Alpha-2-antiplasmin	6e-80	666.594	-0.476702	0.12672	-3.76186	0.000168653	0.00193894
isogroup2470	Receptor expression-enhancing protein	9e-24	5.80081	-2.10984	0.366174	-5.76186	8.32e-09	3.14e-07
isogroup24729	NADH dehydrogenase [ubiquinone] 1 alpha subcomplex subunit 3	2e-48	29.756	0.680911	0.186441	3.65214	0.00026006	0.00277944
isogroup24733	Zinc finger protein 167	6e-28	7.23063	-5.25737	0.559892	-9.38998	6e-21	1.24e-18
isogroup2492	Cell division cycle and apoptosis regulator 1	2e-116	98.9274	1.57921	0.413666	3.81759	0.000134761	0.00160124
isogroup2501	RCL1	6e-47	80.272	-1.14675	0.268962	-4.26361	2.01e-05	0.000313563
isogroup25075	Zinc finger protein 638	1e-09	11.7552	1.21253	0.262894	4.61224	3.98e-06	7.79e-05
isogroup2514	Eukaryotic translation initiation factor 4E binding protein 3	6e-51	254.58	-1.75822	0.222761	-7.89284	2.95e-15	3.3e-13
isogroup25151	HELZ2 (Fragment)	2e-62	2.1934	3.13802	0.69345	4.52523	6.03e-06	0.000111448
isogroup252	Putative TBT binding protein	4e-64	16268.6	-1.5945	0.235187	-6.77973	1.2e-11	7.69e-10
isogroup2521	Chromosome 15 open reading frame 39 (Fragment)	2e-49	17.1906	1.16628	0.326512	3.57195	0.000354336	0.00363097
isogroup2540	Iodotyrosine dehalogenase 1	1e-151	80.6697	-1.38641	0.187504	-7.39402	1.42e-13	1.27e-11
isogroup2542	Glutathione S-transferase(Rho)	8e-140	793.927	0.967762	0.280629	3.44855	0.000563609	0.00537363
isogroup2545	ATP-binding cassette sub-family G member 2 isoform X1	4e-141	48.642	-0.860835	0.18127	-4.7489	2.05e-06	4.37e-05
isogroup2546	Palmitoyltransferase ZDHHC6	3e-165	38.8312	1.46192	0.317294	4.60745	4.08e-06	7.96e-05
isogroup25481	SCAN domain-containing protein 3 (Fragment)	4e-60	2.26879	-4.39085	0.721798	-6.08321	1.18e-09	5.24e-08
isogroup2552	Complement factor h (Fragment)	5e-15	24.0397	1.85909	0.415867	4.47041	7.81e-06	0.000139551
isogroup2572	Zinc-binding protein A33	1e-43	2814.71	-2.25035	0.202362	-11.1204	9.98e-29	4.81e-26
isogroup2577	Retinol dehydrogenase 16	6e-124	69.2113	-2.96414	0.476161	-6.22507	4.81e-10	2.31e-08
isogroup258	Transmembrane protein 106B	6e-101	39.3499	-1.5344	0.304854	-5.03323	4.82e-07	1.22e-05
isogroup25801	Fibroblast growth factor receptor 1	2e-12	6.81103	-4.06047	0.588141	-6.90391	5.06e-12	3.53e-10
isogroup25823	Fish-egg lectin	1e-06	4.1414	-3.85359	0.731141	-5.27065	1.36e-07	3.96e-06
isogroup2583	Zinc finger BED domain-containing protein 1	1e-16	1.73087	-2.78005	0.614181	-4.52643	6e-06	0.000110957
isogroup2586	Ubiquitin domain-containing protein UBFD1	7e-155	18.3316	0.90093	0.232078	3.88201	0.000103598	0.00128235
isogroup2587	Diablo homolog mitochondrial	1e-119	7.69559	1.50387	0.349339	4.3049	1.67e-05	0.000266347
isogroup2588	Unconventional prefoldin RPB5 interactor 1	6e-122	7.96372	1.44057	0.345268	4.17234	3.01e-05	0.000442889
isogroup26	UDP-glucuronosyltransferase 1-1	9e-173	43.8531	1.14497	0.165699	6.90992	4.85e-12	3.4e-10
isogroup2603	Alpha-mannosidase	4e-54	34.8189	-1.203	0.171691	-7.00678	2.44e-12	1.79e-10
isogroup26035	Brain-type fatty acid binding protein	3e-14	130.272	-2.58201	0.682733	-3.78187	0.000155655	0.00181317
isogroup26114	Complement factor H-related protein 1	1e-24	79.1611	-2.27056	0.32016	-7.09196	1.32e-12	1.01e-10
isogroup26173	Transposase	5e-12	1.68013	-2.79502	0.757318	-3.69067	0.00022366	0.00244986
isogroup2621	IMP3	6e-111	2.98452	-1.96982	0.552157	-3.5675	0.000360399	0.00368454
isogroup2628	Natural killer-tumor recognition sequence protein (Fragment)	9e-149	10.6036	1.25339	0.311923	4.01828	5.86e-05	0.000784907
isogroup2633	CCAAT/enhancer binding protein delta2 protein	6e-54	175.897	-1.51596	0.448783	-3.37793	0.000730339	0.00663503
isogroup2638	Tributyltin binding protein type 1	9e-89	48.8226	1.38823	0.427688	3.24589	0.00117085	0.00970521
isogroup26455	CBX4 (Fragment)	2e-12	21.7636	-1.42175	0.35843	-3.96661	7.29e-05	0.000944866
isogroup26580	MXRA7 (Fragment)	2e-26	2.32781	2.0727	0.529661	3.91325	9.11e-05	0.00114696
isogroup26797	GTPase IMAP family member GIMD1	7e-10	1.35972	2.93997	0.839152	3.5035	0.000459179	0.00452278
isogroup2682	Zinc finger BED domain-containing protein 1	3e-07	58.8949	-1.51314	0.18752	-8.06923	7.07e-16	8.52e-14
isogroup2684	Serine/threonine-protein phosphatase	2e-12	17.015	-1.78885	0.206627	-8.65738	4.83e-18	7.3e-16
isogroup2691	Maspardin	6e-24	11.8499	1.43678	0.267611	5.36889	7.92e-08	2.42e-06
isogroup2698	Mannose-P-dolichol utilization defect 1 protein	4e-82	17.8889	-2.01286	0.358741	-5.6109	2.01e-08	7.02e-07
isogroup27004	NADH-ubiquinone oxidoreductase chain 3	3e-28	174.698	-0.940059	0.265986	-3.53424	0.000408952	0.0040967
isogroup2707	Chromosome 9 SCAF14729 whole genome shotgun sequence (Fragment)	3e-159	11.2561	-0.876268	0.260318	-3.36614	0.000762279	0.00687456
isogroup27107	Interferon-induced GTP-binding protein Mx2 (Fragment)	2e-10	5.93371	-1.57691	0.486599	-3.24068	0.00119246	0.0098495
isogroup27191	Solute carrier family 38 member 4	1e-22	4.50758	-2.3356	0.595934	-3.91923	8.88e-05	0.00112029
isogroup2721	MHC class I antigen (Fragment)	9e-81	10.0311	2.26784	0.683833	3.31637	0.000911965	0.00795011
isogroup2743	Glutathione S-transferase Mu 3	4e-143	169.801	1.05876	0.290166	3.64881	0.000263461	0.0028119
isogroup275	Bystin	3e-157	11.9708	-1.44492	0.405465	-3.5636	0.000365803	0.00372887
isogroup27523	Metalloendopeptidase	4e-10	39.9612	3.41689	0.482336	7.08404	1.4e-12	1.06e-10
isogroup2753	Catechol-O-methyltransferase b	9e-170	225.03	-0.614259	0.183257	-3.3519	0.00080258	0.00716877
isogroup27533	Cytolysin Src-1 (Fragment)	2e-16	9.29206	-1.70098	0.369495	-4.60354	4.15e-06	8.09e-05
isogroup2757	Glucagon receptor	1e-53	3.08102	2.98344	0.57036	5.2308	1.69e-07	4.8e-06
isogroup2766	HMG box-containing protein 1	8e-144	4.76391	1.73942	0.449705	3.86791	0.000109772	0.00134635
isogroup27720	Homocysteine-responsive endoplasmic reticulum-resident ubiquitin domain member 2 protein	5e-09	17.2187	-2.16902	0.331548	-6.5421	6.07e-11	3.45e-09
isogroup27760	Fanconi anemia group F protein	3e-45	5.7981	-1.66673	0.390736	-4.26563	1.99e-05	0.000310892
isogroup2777	Mucolipin-3	4e-94	1.82772	-2.76889	0.741812	-3.7326	0.000189514	0.00213439
isogroup27811	Polyubiquitin (Fragment)	3e-75	34.4914	3.48282	0.353552	9.85094	6.79e-23	1.73e-20
isogroup2784	Alpha2-macroglobulin (Fragment)	1e-99	38.967	-1.63203	0.500459	-3.26106	0.00110995	0.00929722
isogroup2790	Glucosamine--fructose-6-phosphate aminotransferase [isomerizing] 1	9e-140	10.7604	1.22953	0.29249	4.20366	2.63e-05	0.000392725
isogroup27925	Neutral and basic amino acid transport protein rBAT	2e-27	4.76459	-2.89262	0.557887	-5.18496	2.16e-07	5.96e-06
isogroup2793	Lamin-B receptor (Fragment)	2e-177	15.7283	1.76077	0.247533	7.11327	1.13e-12	8.85e-11
isogroup27931	Alpha-2-macroglobulin (Fragment)	2e-53	14.1149	2.4743	0.454575	5.44311	5.24e-08	1.66e-06
isogroup28087	Complement component c3	4e-47	4.13205	-2.48264	0.534893	-4.64138	3.46e-06	6.92e-05
isogroup28121	Isocitrate dehydrogenase [NADP]	5e-94	2.25375	-3.2899	0.837125	-3.92999	8.49e-05	0.00107658
isogroup28166	Alanine aminotransferase 2	2e-19	18.1455	-2.70368	0.394878	-6.84689	7.55e-12	5.03e-10
isogroup2818	Chromosome 2 SCAF14781 whole genome shotgun sequence (Fragment)	3e-74	6.24956	-1.86744	0.42952	-4.34774	1.38e-05	0.000224167
isogroup28205	Ubiquitin specific peptidase like 1	2e-09	2.47681	-2.27793	0.653712	-3.48461	0.000492847	0.00480445
isogroup2834	Zinc finger BED domain-containing protein 1	5e-144	1.68444	-3.20778	0.626974	-5.11629	3.12e-07	8.31e-06
isogroup28365	Serum lectin isoform 1	4e-25	1.47599	-3.65459	0.782413	-4.67092	3e-06	6.13e-05
isogroup28413	Adenylate kinase 7	6e-17	2.69463	-4.36921	0.695788	-6.27952	3.4e-10	1.69e-08
isogroup285	UDP-glucuronosyltransferase 2B31	2e-112	86.6147	-1.71503	0.336717	-5.09339	3.52e-07	9.25e-06
isogroup28538	PPUP9506	7e-10	7.57598	-1.87589	0.444451	-4.2207	2.44e-05	0.000368108
isogroup28642	Septin-4	1e-54	2.44644	3.02961	0.746783	4.05687	4.97e-05	0.000682465
isogroup28647	15.5 kDa protein	1e-15	0.900625	2.76687	0.709295	3.90087	9.58e-05	0.00119747
isogroup2869	Specifically androgen-regulated protein	3e-67	19.4911	0.988893	0.248154	3.98499	6.75e-05	0.000885052
isogroup28759	Zinc finger protein 721	3e-44	6.49349	2.16276	0.368412	5.87049	4.35e-09	1.73e-07
isogroup2887	3-oxo-5-beta-steroid 4-dehydrogenase	2e-163	199.52	0.675444	0.154664	4.36717	1.26e-05	0.000208995
isogroup28909	Sterile alpha motif domain-containing 9 protein (Fragment)	7e-39	1.8827	-3.23656	0.740656	-4.36986	1.24e-05	0.000206995
isogroup2893	Zona pellucida sperm-binding protein 3	3e-18	104.331	-1.56808	0.200957	-7.80309	6.04e-15	6.45e-13
isogroup28931	GTPase IMAP family member 4	2e-06	10.9513	3.16101	0.560702	5.63759	1.72e-08	6.17e-07
isogroup2894	MDR1	8e-33	40.4808	-0.676723	0.190242	-3.55717	0.000374877	0.00380981
isogroup2903	15-hydroxyprostaglandin dehydrogenase (NAD(+))	2e-168	7.40859	1.10646	0.330882	3.34398	0.000825851	0.00734495
isogroup29112	TM131	3e-56	3.14193	2.24818	0.679698	3.30761	0.000940948	0.00814823
isogroup2923	Methionine-R-sulfoxide reductase B1-A	2e-58	32.7946	-1.34426	0.204509	-6.57313	4.93e-11	2.84e-09
isogroup2927	RAP2C member of RAS oncogene family (Fragment)	2e-38	2.26999	3.22053	0.594611	5.4162	6.09e-08	1.91e-06
isogroup29382	CREB binding protein a (Fragment)	1e-21	34.0725	0.718603	0.191344	3.75555	0.00017296	0.0019774
isogroup29439	Forkhead box O3b (Fragment)	1e-10	5.11711	-2.1799	0.567743	-3.83959	0.000123238	0.00148724
isogroup295	Long-chain fatty acid transport protein 3	2e-178	54.9409	0.819755	0.176855	4.63519	3.57e-06	7.08e-05
isogroup2974	15-hydroxyprostaglandin dehydrogenase (NAD(+))	1e-167	3.31216	1.6634	0.462992	3.59272	0.000327246	0.00338147
isogroup29751	Ectonucleotide pyrophosphatase/phosphodiesterase family member 2	4e-44	9.11112	1.46961	0.41684	3.5256	0.000422527	0.00421077
isogroup29776	Chromosome 15 open reading frame 41	2e-80	1.56394	2.25722	0.609348	3.70432	0.000211958	0.00234584
isogroup29782	Dihydropyridine-sensitive L-type skeletal muscle calcium channel subunit alpha-1	3e-65	1.01564	3.51649	0.700351	5.02104	5.14e-07	1.29e-05
isogroup2980	Enoyl-Coenzyme A hydratase/3-hydroxyacyl Coenzyme A dehydrogenase (Fragment)	5e-79	145.969	1.68377	0.169787	9.91696	3.51e-23	9.5e-21
isogroup2981	Chromosome 2 SCAF14997 whole genome shotgun sequence (Fragment)	2e-161	1.87063	-3.63443	0.759561	-4.7849	1.71e-06	3.74e-05
isogroup2983	Ribose-phosphate pyrophosphokinase 1	1e-129	2.45585	-2.2568	0.564416	-3.99846	6.38e-05	0.000842255
isogroup299	TOB1	2e-175	358.07	-1.39939	0.337463	-4.14679	3.37e-05	0.000486717
isogroup30055	Putative ATP-dependent RNA helicase DHX40	4e-32	1.69501	2.23972	0.638895	3.50562	0.000455541	0.00449189
isogroup30057	Calcium-binding mitochondrial carrier protein SCaMC-1-B	2e-39	1.19601	-2.66367	0.750326	-3.55002	0.000385206	0.0038968
isogroup3023	Nuclear receptor coactivator 4	2e-20	371.428	1.47668	0.294567	5.01303	5.36e-07	1.34e-05
isogroup30265	Peroxisome proliferator-activated receptor gamma coactivator-related protein 1	2e-30	1.41947	-2.41398	0.731247	-3.30118	0.000962794	0.00831097
isogroup3035	Alpha-class glutathione S-transferase	9e-132	559.215	-1.56154	0.319298	-4.89054	1.01e-06	2.32e-05
isogroup304	Ras-related C3 botulinum toxin substrate 1	2e-129	63.5736	1.12376	0.257162	4.36986	1.24e-05	0.000206995
isogroup3042	RFT1 homolog	7e-92	5.32015	-1.28872	0.394492	-3.2668	0.00108771	0.00914356
isogroup30476	Dihydropyridine-sensitive L-type skeletal muscle calcium channel subunit alpha-1	5e-78	0.823639	2.82121	0.866523	3.25578	0.00113079	0.00943114
isogroup3049	Interferon-induced protein 44	1e-38	6.71383	-2.02712	0.480963	-4.21471	2.5e-05	0.00037677
isogroup305	Anti-Mullerian hormone	1e-156	11.0586	-1.87524	0.518972	-3.61337	0.000302245	0.00316234
isogroup3055	Peroxisomal membrane protein 2 22kDa (Fragment)	1e-108	127.637	0.891964	0.232923	3.82944	0.000128436	0.00153734
isogroup30554	Eukaryotic translation initiation factor 2 subunit 3	6e-16	22.7402	-0.766658	0.221605	-3.45958	0.000541027	0.00519204
isogroup3066	Glucosamine-6-phosphate isomerase	3e-78	5.28552	1.34434	0.402073	3.34353	0.000827211	0.0073505
isogroup307	Chromosome 17 SCAF14563 whole genome shotgun sequence (Fragment)	1e-06	67.8038	-1.13205	0.210026	-5.39006	7.04e-08	2.18e-06
isogroup3081	Nucleolar protein 16	6e-90	8.32849	-1.35938	0.388958	-3.49494	0.000474175	0.0046488
isogroup30815	Complement component c3	8e-18	22.8588	-2.00809	0.489575	-4.10169	4.1e-05	0.000574734
isogroup3085	Solute carrier family 12 member 5	4e-40	36.0041	-1.97623	0.3643	-5.42474	5.8e-08	1.83e-06
isogroup30963	Acyl-coenzyme A thioesterase 2 mitochondrial	1e-50	3.09645	2.88433	0.536874	5.37245	7.77e-08	2.38e-06
isogroup31	CLOCK-interacting pacemaker	7e-08	40.5798	-3.92351	0.730785	-5.36889	7.92e-08	2.42e-06
isogroup3109	Alpha-1-antitrypsin	2e-54	20.3781	2.35084	0.405328	5.79984	6.64e-09	2.53e-07
isogroup31176	Chromobox protein	8e-34	3.90417	-2.35884	0.629917	-3.74468	0.000180622	0.0020498
isogroup31185	Ubiquitin	2e-34	8.29874	4.1489	0.545865	7.60058	2.95e-14	2.86e-12
isogroup31221	3-oxo-5-beta-steroid 4-dehydrogenase	2e-56	5.79713	2.02241	0.464139	4.35734	1.32e-05	0.000216498
isogroup3128	SWI/SNF related matrix associated actin dependent regulator of chromatin subfamily a member 2	8e-143	3.73314	1.65429	0.474662	3.48521	0.000491759	0.00479687
isogroup313	Glycosyltransferase family 92 protein F13G3.3	1e-07	51.5423	-0.983231	0.28931	-3.39853	0.000677479	0.00621338
isogroup3130	Gamma-interferon-inducible lysosomal thiol reductase	3e-153	46.0173	1.50826	0.220458	6.84149	7.84e-12	5.2e-10
isogroup31318	Ependymin	1e-06	77.6059	2.02026	0.464744	4.34703	1.38e-05	0.000224653
isogroup3134	Protein lifeguard 1	5e-67	0.839203	-2.60706	0.720597	-3.61792	0.000296978	0.00311464
isogroup31605	Serum lectin isoform 3	1e-23	27.9796	5.20553	0.60142	8.65541	4.91e-18	7.39e-16
isogroup3175	PPUP2357 (Fragment)	8e-09	24.7898	0.951817	0.280057	3.39865	0.000677184	0.00621338
isogroup31775	Metalloendopeptidase	1e-49	6.81777	1.9477	0.561945	3.466	0.000528269	0.00508861
isogroup31846	Neural Wiskott-Aldrich syndrome protein	7e-38	8.75055	-0.910923	0.264272	-3.44691	0.000567031	0.00540459
isogroup3187	Alanine aminotransferase 2	3e-128	58.8196	-0.993819	0.24151	-4.11503	3.87e-05	0.000547314
isogroup31884	Eukaryotic translation initiation factor 4E-binding protein 3	1e-13	6.04283	-1.84906	0.50414	-3.66775	0.000244691	0.0026403
isogroup319	Chromosome 16 SCAF15002 whole genome shotgun sequence (Fragment)	3e-60	47.6396	0.633647	0.127871	4.95536	7.22e-07	1.72e-05
isogroup3191	UPF0729 protein	2e-44	69.7854	-0.869604	0.162213	-5.36088	8.28e-08	2.52e-06
isogroup3203	Dihydrofolate reductase	6e-117	50.5073	2.5107	0.218287	11.5018	1.29e-30	7.38e-28
isogroup32065	Solute carrier family 22 member 16	5e-32	30.3637	1.73514	0.252535	6.87087	6.38e-12	4.35e-10
isogroup3222	Antigen peptide transporter 2	6e-51	13.6948	1.13759	0.288522	3.94281	8.05e-05	0.00102994
isogroup3223	N-acetylserotonin O-methyltransferase protein	2e-23	6.02545	-1.61488	0.428771	-3.76629	0.000165691	0.00191345
isogroup3226	Transcription initiation factor TFIID subunit 10 (Fragment)	1e-106	9.56452	-1.56286	0.366881	-4.25984	2.05e-05	0.000318251
isogroup3231	Eukaryotic peptide chain release factor GTP-binding subunit ERF3B	5e-95	16.6446	-1.90786	0.463181	-4.11905	3.8e-05	0.000539579
isogroup327	Deoxynucleoside triphosphate triphosphohydrolase SAMHD1	5e-94	5.87024	2.55695	0.560815	4.55935	5.13e-06	9.71e-05
isogroup3272	Tetratricopeptide repeat	3e-172	7.85378	-2.26173	0.583204	-3.87811	0.000105269	0.00129991
isogroup32747	Nuclear ubiquitous casein and cyclin-dependent kinase substrate 1	3e-19	13.5722	0.908957	0.269149	3.37715	0.00073242	0.00664805
isogroup328	Diacylglycerol O-acyltransferase 2	6e-125	10.7668	-1.04077	0.319156	-3.261	0.00111021	0.00929722
isogroup3281	DNA-directed RNA polymerase subunit	3e-67	6.09364	-1.55125	0.366658	-4.23078	2.33e-05	0.00035408
isogroup330	Sterol 26-hydroxylase mitochondrial	6e-154	45.9414	-2.97606	0.241842	-12.3058	8.43e-35	6.19e-32
isogroup3301	Cytochrome b5 type A (Microsomal)	4e-76	19.9218	-2.18204	0.334823	-6.51698	7.17e-11	4.01e-09
isogroup33033	Allantoicase	7e-27	52.7063	-0.817093	0.237381	-3.44211	0.0005772	0.00547275
isogroup33149	Pentaxin	3e-11	1730.86	2.30111	0.493349	4.66426	3.1e-06	6.3e-05
isogroup33177	Retinol-binding protein 2	1e-32	84.9172	-2.73824	0.729956	-3.75123	0.000175966	0.00200508
isogroup3318	Chloride anion exchanger	4e-87	18.1158	1.32513	0.260892	5.07925	3.79e-07	9.89e-06
isogroup3320	Cystatin	4e-39	739.164	-1.30303	0.11653	-11.182	5e-29	2.48e-26
isogroup3329	C3orf1 homolog	3e-19	3.10062	-2.58642	0.532441	-4.85767	1.19e-06	2.69e-05
isogroup333	Cytochrome P450 2J2	2e-132	144.382	-5.04808	0.310983	-16.2327	2.96e-59	6.09e-56
isogroup3349	Carboxylic ester hydrolase	2e-176	156.316	-3.32691	0.382758	-8.69194	3.56e-18	5.47e-16
isogroup335	Vitamin K-dependent protein S	1e-14	287.865	1.12422	0.256926	4.37566	1.21e-05	0.000202324
isogroup33542	Si:dkey-3n22.9	8e-19	1.60218	-2.4682	0.657677	-3.7529	0.000174797	0.00199619
isogroup33587	Reverse transcriptase protein (Fragment)	4e-14	8.70515	4.85455	0.721389	6.72944	1.7e-11	1.06e-09
isogroup337	Hyaluronan-binding protein 2	4e-140	2899.11	-0.783558	0.168284	-4.65616	3.22e-06	6.5e-05
isogroup33722	Dehydrogenase/reductase SDR family member 4	2e-59	10.3355	2.69158	0.323826	8.3118	9.43e-17	1.27e-14
isogroup339	Selenoprotein P	2e-79	9894.38	0.587397	0.139415	4.21329	2.52e-05	0.000378554
isogroup3393	5-hydroxyisourate hydrolase	9e-78	55.5455	-0.959957	0.226968	-4.22948	2.34e-05	0.000355735
isogroup3397	ADP-ribosylation factor 13B protein	3e-111	10.4801	-1.76626	0.369616	-4.77863	1.76e-06	3.85e-05
isogroup3400	Chromobox protein (Fragment)	6e-34	7.46387	2.23223	0.368559	6.05665	1.39e-09	6.1e-08
isogroup34090	Matrix metalloproteinase-16	5e-47	2.23495	-1.99345	0.6104	-3.26581	0.00109151	0.00917048
isogroup34227	Zinc finger BED domain containing 4	8e-14	0.951465	-2.88372	0.788493	-3.65725	0.000254935	0.00273225
isogroup34243	YF64	7e-58	10.2709	1.37409	0.393848	3.48889	0.000485037	0.0047418
isogroup3432	Multidrug and toxin extrusion protein	5e-35	7.95162	-3.5584	0.493978	-7.20355	5.87e-13	4.8e-11
isogroup3433	Glycine C-acetyltransferase	5e-178	40.6599	-0.725481	0.200509	-3.6182	0.000296663	0.00311345
isogroup34492	Merlin	8e-21	3.52497	1.8702	0.548303	3.41089	0.000647508	0.00599738
isogroup346	Zinc finger protein 576	3e-15	18.9621	0.800833	0.22524	3.55546	0.000377316	0.00382702
isogroup3473	Starch-binding domain-containing protein 1	3e-91	12.4679	1.42693	0.290295	4.91546	8.86e-07	2.08e-05
isogroup3482	Protein prune	4e-175	2.31901	3.30475	0.643269	5.13743	2.79e-07	7.48e-06
isogroup34852	E3 ubiquitin/ISG15 ligase TRIM25	5e-23	8.2534	4.35384	0.645208	6.74797	1.5e-11	9.42e-10
isogroup34983	GIMA4 (Fragment)	4e-41	7.01801	3.19713	0.752621	4.248	2.16e-05	0.000332194
isogroup350	SPARC-related modular calcium-binding protein 2	5e-144	11.4636	-2.22151	0.402093	-5.52486	3.3e-08	1.09e-06
isogroup35038	Granulins	6e-18	1.31038	-2.12095	0.644222	-3.29227	0.000993832	0.00851927
isogroup35108	RTJK (Fragment)	3e-34	20.1514	1.95587	0.390461	5.00913	5.47e-07	1.36e-05
isogroup35112	RuvB helicase (Fragment)	4e-53	2.75685	-2.48961	0.685619	-3.63119	0.000282114	0.00298003
isogroup35117	ALPK2 (Fragment)	3e-67	1.1874	3.22503	0.762528	4.2294	2.34e-05	0.000355735
isogroup3517	Chromosome 17 SCAF15006 whole genome shotgun sequence (Fragment)	1e-123	9.56891	-1.53417	0.372934	-4.11377	3.89e-05	0.000549793
isogroup35209	Chromosome 2 SCAF8387 whole genome shotgun sequence	2e-09	30.4325	7.01721	0.658322	10.6592	1.58e-26	6.01e-24
isogroup3523	Aquaporin-8	3e-138	7.98744	-4.84029	0.63131	-7.66706	1.76e-14	1.75e-12
isogroup3525	RWD domain-containing protein 1	2e-114	27.9256	-2.00309	0.196668	-10.1851	2.31e-24	7.2e-22
isogroup3536	FAHD1	1e-149	17.0921	-1.09264	0.288321	-3.78965	0.000150858	0.00176563
isogroup35422	Peroxisome proliferator-activated receptor beta	2e-18	2.02042	2.06751	0.629258	3.28564	0.00101752	0.00866449
isogroup35493	Actin-related protein 2/3 complex subunit 5	3e-42	5.28183	-3.1092	0.627169	-4.95751	7.14e-07	1.71e-05
isogroup3558	Thymidine kinase 2 mitochondrial	1e-158	2.28791	2.56676	0.585588	4.38321	1.17e-05	0.000196607
isogroup356	Transmembrane and immunoglobulin domain-containing protein 1	3e-28	15.2034	-4.71779	0.422082	-11.1774	5.26e-29	2.57e-26
isogroup3576	Multidrug and toxin extrusion protein	2e-85	1.45158	-3.20252	0.763289	-4.19569	2.72e-05	0.00040484
isogroup35774	RNA-binding protein 42	2e-44	7.0708	1.23327	0.327825	3.76198	0.000168574	0.00193875
isogroup35857	Putative methyltransferase	5e-43	27.7665	2.09014	0.3815	5.47872	4.28e-08	1.38e-06
isogroup36	Proprotein convertase subtilisin/kexin type 6	1e-156	191.252	-0.571031	0.153805	-3.71271	0.000205055	0.00228009
isogroup360	Prostamide/prostaglandin F synthase	2e-06	30.0788	0.918343	0.253953	3.6162	0.000298963	0.00313226
isogroup3602	Eukaryotic translation initiation factor 2 subunit 1	2e-06	56.0044	-1.41769	0.18735	-7.56706	3.82e-14	3.64e-12
isogroup3604	RT nLTR: Non-LTR (Long terminal repeat) retrotransposon and domain-containing protein (Fragment)	5e-42	14.9514	-2.76702	0.385345	-7.18064	6.94e-13	5.51e-11
isogroup36119	Complement C1q protein 2	8e-37	28.4926	-2.94868	0.529181	-5.57214	2.52e-08	8.54e-07
isogroup3619	Mediator of DNA-damage checkpoint 1 (Fragment)	3e-22	25.1354	1.15856	0.254786	4.54721	5.44e-06	0.000101958
isogroup3627	G0/G1 switch regulatory protein 2	4e-50	41.8913	-1.46186	0.438741	-3.33195	0.000862405	0.00759537
isogroup363	N-acylethanolamine-hydrolyzing acid amidase	2e-138	22.9181	-1.25544	0.299238	-4.19545	2.72e-05	0.000404869
isogroup36354	Complement C3	2e-54	1.19158	2.70906	0.711902	3.80539	0.000141582	0.00167135
isogroup3640	Si:dkey-3n22.9	3e-38	0.848983	-2.72946	0.803089	-3.39871	0.000677047	0.00621338
isogroup36479	NELFE	1e-79	5.01971	1.73132	0.457103	3.78759	0.000152114	0.00177797
isogroup366	D site of albumin promoter (Albumin D-box) binding protein	3e-13	76.2578	-2.69451	0.553101	-4.87164	1.11e-06	2.52e-05
isogroup36644	Alpha-mannosidase	6e-53	4.73788	4.79274	0.625344	7.66417	1.8e-14	1.78e-12
isogroup36710	Lectin C-type domain containing protein	6e-21	3.16364	-2.7674	0.82872	-3.33937	0.000839691	0.00743782
isogroup3674	Ubiquitin carboxyl-terminal hydrolase 30	2e-173	4.53685	-1.53413	0.466401	-3.28929	0.00100441	0.00858575
isogroup36762	RNA-binding motif single-stranded-interacting protein 3	2e-18	5.14851	-1.74668	0.387573	-4.50671	6.58e-06	0.00011984
isogroup3689	SENP2	7e-08	17.6095	-2.78774	0.466216	-5.97952	2.24e-09	9.47e-08
isogroup3695	AP-2 complex subunit mu-A	2e-44	21.8294	1.29543	0.399644	3.24146	0.00118919	0.00982517
isogroup37168	Lectin C-type domain containing protein	2e-23	105.153	-6.38212	0.577831	-11.0449	2.32e-28	1.05e-25
isogroup3721	Lysozyme C	2e-38	2891.66	-1.35963	0.241931	-5.61991	1.91e-08	6.71e-07
isogroup3724	Mesoderm specific transcript	4e-08	1.28909	-3.60842	0.719164	-5.01752	5.23e-07	1.31e-05
isogroup3735	F-actin-capping protein subunit beta	3e-180	45.3297	-1.76919	0.315398	-5.60939	2.03e-08	7.05e-07
isogroup3737	TCTP	4e-79	3446.57	0.771539	0.112015	6.8878	5.67e-12	3.88e-10
isogroup3738	DDRGK domain containing 1	4e-71	19.902	-0.886935	0.195937	-4.52664	5.99e-06	0.000110915
isogroup3743	Alanine--glyoxylate aminotransferase 2 mitochondrial	6e-26	2.43804	-2.98833	0.60689	-4.92402	8.48e-07	2e-05
isogroup3746	Nuclear export mediator factor Nemf	3e-64	12.5742	0.87632	0.248452	3.52712	0.000420111	0.00418807
isogroup375	Cytochrome P450 3A24	6e-176	125.713	-1.83442	0.28462	-6.44517	1.15e-10	6.21e-09
isogroup3764	Prostaglandin D synthase	3e-76	6065.39	-1.5891	0.178933	-8.88097	6.63e-19	1.14e-16
isogroup37647	U3 small nucleolar ribonucleoprotein protein MPP10	6e-19	4.27015	-1.84927	0.525093	-3.5218	0.000428632	0.00426062
isogroup37673	Ataxin-7 protein 1	6e-11	8.75454	1.42871	0.349737	4.08512	4.41e-05	0.000610784
isogroup3773	Butyrophilin subfamily 1 member A1	3e-12	1.70077	-2.5019	0.765576	-3.268	0.0010831	0.00911716
isogroup37747	Probable phospholipid-transporting ATPase IA	3e-12	5.04514	-2.86308	0.510356	-5.60997	2.02e-08	7.05e-07
isogroup37939	Cholinergic receptor muscarinic 2a (Fragment)	8e-53	5.41164	1.79016	0.496396	3.6063	0.000310589	0.00323852
isogroup37986	NADH-ubiquinone oxidoreductase chain 1	1e-38	12.6331	-2.90264	0.412092	-7.04367	1.87e-12	1.39e-10
isogroup3808	Erythromycin 3-O-methyltransferase	3e-10	42.4591	1.28293	0.217273	5.90467	3.53e-09	1.44e-07
isogroup3809	Pantothenate kinase 2	6e-88	7.55247	-1.35905	0.325702	-4.17269	3.01e-05	0.000442412
isogroup3814	Serine/arginine-rich splicing factor 10	3e-62	22.0912	1.27104	0.314847	4.037	5.41e-05	0.000733527
isogroup3825	PC4 and SFRS1 interacting protein 1	8e-118	9.06241	2.19496	0.434965	5.0463	4.5e-07	1.15e-05
isogroup383	Dehydrogenase/reductase SDR family member 13	4e-164	193.256	-2.37527	0.271566	-8.74657	2.2e-18	3.48e-16
isogroup3840	Glycolipid transfer protein domain containing 2 (Fragment)	4e-39	45.9235	-1.42019	0.254985	-5.56972	2.55e-08	8.65e-07
isogroup3847	Rho GTPase-activating protein 25	3e-99	6.26845	-1.60465	0.440616	-3.64184	0.000270698	0.00288016
isogroup38536	Glyceronephosphate O-acyltransferase	6e-24	1.48193	-2.66244	0.660301	-4.03216	5.53e-05	0.000745107
isogroup3871	DnaJ domain-containing protein	8e-76	0.936278	-2.8529	0.826049	-3.45367	0.000553006	0.00529871
isogroup3884	ASC	4e-30	3.50335	-2.90794	0.533647	-5.44918	5.06e-08	1.61e-06
isogroup3885	Choriogenin Ha	4e-165	258.889	2.4033	0.644885	3.7267	0.000194	0.00217678
isogroup38877	Hydroxysteroid (11-beta) dehydrogenase 1 (Fragment)	3e-68	4.72997	3.47053	0.595405	5.82885	5.58e-09	2.17e-07
isogroup38883	Cytochrome c oxidase subunit 2	2e-37	9.69526	6.43696	0.598655	10.7524	5.78e-27	2.28e-24
isogroup38933	Retinol binding-protein 7	7e-42	1.92837	2.29784	0.592085	3.88093	0.000104058	0.00128701
isogroup38957	Cathepsin H	3e-08	27.061	1.35186	0.270012	5.00665	5.54e-07	1.38e-05
isogroup39062	Septin-4	4e-25	2.63629	2.47416	0.719172	3.44029	0.000581091	0.00550626
isogroup39074	Cytochrome c oxidase subunit 2	3e-38	10.961	6.59845	0.595485	11.0808	1.55e-28	7.15e-26
isogroup39116	Sulfotransferase	1e-46	3.69439	3.56054	0.688826	5.16901	2.35e-07	6.4e-06
isogroup394	Leiomodin-1	1e-178	20.0968	-3.15625	0.53926	-5.85293	4.83e-09	1.9e-07
isogroup39401	Alpha-2-macroglobulin	5e-49	14.0353	2.54308	0.512965	4.9576	7.14e-07	1.71e-05
isogroup3953	Glutathione peroxidase	4e-121	135.009	-0.726618	0.223805	-3.24666	0.0011677	0.00968391
isogroup39739	Tripartite motif-containing protein 35	6e-12	3.33088	4.02832	0.631911	6.37482	1.83e-10	9.52e-09
isogroup39741	Cytochrome c oxidase subunit 2	8e-38	10.4565	6.78185	0.597949	11.3418	8.14e-30	4.4e-27
isogroup39814	SPRY domain-containing protein 7	2e-48	1.1437	2.86597	0.742769	3.8585	0.000114086	0.00138986
isogroup3987	Beta-ureidopropionase	2e-69	139.042	3.34551	0.377988	8.85084	8.69e-19	1.46e-16
isogroup39874	Interferon regulatory factor 9 (Fragment)	2e-33	4.44446	1.85758	0.41146	4.51461	6.34e-06	0.00011608
isogroup3990	Protein canopy-1	3e-78	31.4142	-1.66243	0.32639	-5.09339	3.52e-07	9.25e-06
isogroup40157	Mitofusin-2	5e-33	10.0649	1.96943	0.394031	4.99815	5.79e-07	1.43e-05
isogroup4016	Nuclear factor interleukin-3-regulated protein	1e-25	9.04782	-2.83223	0.54518	-5.19503	2.05e-07	5.71e-06
isogroup4021	ATP synthase subunit a	1e-70	1540.56	-5.4523	0.242459	-22.4875	5.5e-112	3.39e-108
isogroup40261	HGFL (Fragment)	4e-15	25.6979	-0.949812	0.263248	-3.60805	0.000308509	0.00322351
isogroup4028	L-rhamnose-binding lectin SML	1e-82	8.5782	2.66371	0.714814	3.72644	0.000194201	0.00217825
isogroup4035	Solute carrier family 27 member 2	4e-114	48.1311	-4.7503	0.486887	-9.75647	1.73e-22	4.24e-20
isogroup4043	Ca2+-dependent complex c1r/c1S subunit (Fragment)	9e-103	22.5985	3.41526	0.810899	4.2117	2.53e-05	0.000380855
isogroup40467	Erythrocyte membrane protein band 4.1b (Elliptocytosis 1 RH-linked) (Fragment)	3e-10	2.78351	2.54074	0.594512	4.27366	1.92e-05	0.000301579
isogroup405	Serum paraoxonase/arylesterase 2	3e-127	122.107	-1.73022	0.141401	-12.2363	1.99e-34	1.43e-31
isogroup40508	Sacsin	1e-20	42.1883	-5.34163	0.716326	-7.45698	8.85e-14	8.17e-12
isogroup4051	Polycomb group ring finger 5	5e-96	16.5138	1.36124	0.324243	4.19822	2.69e-05	0.000401503
isogroup406	Acyl-coenzyme A thioesterase 4	3e-33	4.74162	-2.44983	0.41575	-5.89255	3.8e-09	1.53e-07
isogroup4064	Reverse transcriptase protein (Fragment)	6e-17	3.47829	-4.78211	0.656181	-7.28779	3.15e-13	2.69e-11
isogroup4076	Ig heavy chain V-III region VH26	1e-52	1.97131	2.6533	0.608379	4.36126	1.29e-05	0.000213146
isogroup40765	Activator of heat shock protein ATPase	2e-38	2.7691	-2.70843	0.59367	-4.56217	5.06e-06	9.6e-05
isogroup40811	Glycolipid transfer protein domain-containing protein 1	1e-22	1.60058	3.81336	0.80658	4.72781	2.27e-06	4.79e-05
isogroup4083	Large neutral amino acids transporter small subunit 3	3e-108	12.8927	-1.8319	0.350854	-5.22126	1.78e-07	5.04e-06
isogroup40947	Myosin-11 protein (Fragment)	3e-09	3.50922	2.59552	0.546806	4.74668	2.07e-06	4.41e-05
isogroup4105	Corepressor interacting with RBPJ 1	3e-121	12.7264	1.03567	0.312122	3.31815	0.000906158	0.00790843
isogroup41066	Cartilage acidic protein 2	2e-08	1.25395	-2.42118	0.735952	-3.28986	0.00100237	0.0085781
isogroup41098	Sodium-coupled neutral amino acid transporter 4	5e-22	3.36303	-2.22882	0.63408	-3.51505	0.000439678	0.00435497
isogroup41143	Putative isoprenylcysteine alpha-carbonyl methylesterase ICME	2e-30	0.987097	2.96489	0.762115	3.89035	0.000100101	0.00124457
isogroup4117	Apolipoprotein C-II	7e-36	636.87	-0.493576	0.113416	-4.35189	1.35e-05	0.000220774
isogroup4125	Collagen alpha-1XIII chain	1e-42	157.102	1.62165	0.395414	4.10115	4.11e-05	0.000575663
isogroup41559	PTN6 (Fragment)	9e-52	6.70338	1.71005	0.449473	3.80457	0.000142052	0.0016756
isogroup41615	Alpha amylase (Fragment)	8e-69	3.18251	4.92914	0.639703	7.70535	1.3e-14	1.32e-12
isogroup41616	Alpha-amylase	7e-54	657.041	1.62352	0.395745	4.10244	4.09e-05	0.000573758
isogroup41644	Merlin	7e-21	52.979	3.0737	0.498617	6.16444	7.07e-10	3.31e-08
isogroup41645	Merlin	3e-22	84.4025	4.61741	0.570366	8.09553	5.7e-16	6.95e-14
isogroup41668	Rho GTPase-activating protein 12	6e-19	3.98992	-2.21014	0.606925	-3.64154	0.000271009	0.00288247
isogroup417	Asparaginase homolog	2e-165	42.2592	-3.80837	0.287912	-13.2275	6.08e-40	5.69e-37
isogroup41712	NF7B (Fragment)	1e-29	26.7098	2.04402	0.475918	4.2949	1.75e-05	0.000276928
isogroup41723	PPUP3880	6e-41	8.56304	2.84888	0.567558	5.01954	5.18e-07	1.3e-05
isogroup41786	Transmembrane protein 30Ab (Fragment)	7e-54	2.24909	-2.37155	0.542384	-4.37246	1.23e-05	0.000205093
isogroup4196	Cytochrome P450 2J2	2e-178	1.132	-2.68124	0.759733	-3.5292	0.000416825	0.00416339
isogroup4203	MRP4	7e-29	13.6164	-1.31631	0.367305	-3.58371	0.000338748	0.00348747
isogroup4211	Zinc finger protein 318 (Fragment)	5e-06	11.8292	1.21175	0.300153	4.0371	5.41e-05	0.000733527
isogroup4224	PNGF (Fragment)	7e-72	38.0251	0.738981	0.208702	3.54084	0.000398849	0.0040072
isogroup42260	GTPase IMAP family member 8	4e-60	8.37245	1.9751	0.506097	3.90262	9.52e-05	0.00119125
isogroup4233	Vesicle-associated membrane protein 1 (Fragment)	4e-47	4.04236	-1.45513	0.415341	-3.50346	0.00045926	0.00452278
isogroup4241	PIN2/TERF1-interacting telomerase inhibitor 1	7e-16	20.3635	-1.15084	0.310985	-3.70063	0.000215066	0.00237317
isogroup42430	Dsc2l protein (Fragment)	9e-11	4.21153	-1.59245	0.446475	-3.56671	0.000361492	0.00369448
isogroup4248	Chromosome 2 SCAF8387 whole genome shotgun sequence	7e-15	27.2414	-3.39797	0.760594	-4.46753	7.91e-06	0.000141194
isogroup425	Biogenesis of lysosome-related organelles complex 1 subunit 6	8e-67	22.1979	-0.831278	0.205782	-4.03961	5.35e-05	0.000726926
isogroup426	DCP2	6e-118	18.9198	0.946459	0.265981	3.55837	0.00037317	0.00379371
isogroup4266	NADH dehydrogenase [ubiquinone] 1 beta subcomplex subunit 3	5e-54	97.7287	0.645954	0.16287	3.96608	7.31e-05	0.000945792
isogroup4267	Alpha-enolase	6e-126	14.6655	-1.7222	0.36043	-4.77819	1.77e-06	3.85e-05
isogroup42700	Pol polyprotein	1e-30	1.35846	-3.69383	0.739585	-4.99447	5.9e-07	1.45e-05
isogroup42747	Amino acid transporter	1e-10	7.60771	-1.54556	0.415788	-3.71719	0.000201447	0.00224645
isogroup4286	Nocturnin	5e-44	3.13774	-3.64609	0.941085	-3.87435	0.000106911	0.00131663
isogroup42926	Complement factor H-related protein 1	2e-41	2.00134	-2.60851	0.617898	-4.22159	2.43e-05	0.000366842
isogroup430	PPUP1244	2e-20	50.4146	-1.2052	0.323373	-3.72696	0.000193803	0.00217647
isogroup43018	Serum lectin isoform 3	4e-18	460.537	8.73721	0.374413	23.3358	1.92e-120	2.96e-116
isogroup4315	RNA-binding protein 25	3e-91	31.7281	1.21655	0.232472	5.23308	1.67e-07	4.74e-06
isogroup43365	Metabotropic glutamate receptor 1	7e-10	14.2686	-1.84558	0.413892	-4.45909	8.23e-06	0.000145303
isogroup43400	Murinoglobulin-2	7e-54	3.92785	-2.91718	0.614086	-4.75045	2.03e-06	4.35e-05
isogroup43433	E3 ubiquitin-protein ligase TRIM39 (Fragment)	6e-18	4.97952	1.79183	0.447432	4.00469	6.21e-05	0.000822833
isogroup4358	Protein tyrosine phosphatase type IVA 2	3e-55	3.57294	-2.54773	0.583341	-4.36748	1.26e-05	0.000208902
isogroup4366	Aminopeptidase NPEPL1 putative	2e-48	25.8535	-1.81836	0.209319	-8.68705	3.72e-18	5.68e-16
isogroup437	Lamin-A	5e-116	16.9024	-1.46543	0.389397	-3.76334	0.000167661	0.00193114
isogroup43766	Acid sphingomyelinase phosphodiesterase 3a protein	2e-45	6.42743	-2.15885	0.432256	-4.99438	5.9e-07	1.45e-05
isogroup4377	H/ACA ribonucleoprotein complex subunit 4	1e-178	49.6237	-2.07254	0.430672	-4.81233	1.49e-06	3.3e-05
isogroup438	Protoporphyrinogen oxidase	2e-133	14.4931	-1.22581	0.250634	-4.89082	1e-06	2.32e-05
isogroup43821	ATP synthase subunit a (Fragment)	7e-34	1067.95	8.07912	0.358583	22.5307	2.08e-112	1.6e-108
isogroup4391	Ethanolamine-phosphate cytidylyltransferase protein	2e-14	8.06732	-1.54501	0.410833	-3.76068	0.000169454	0.00194655
isogroup44	Nucleobindin-2	4e-141	28.5139	-1.07243	0.246417	-4.35209	1.35e-05	0.000220695
isogroup4405	Upf0249 protein ydjc homolog	3e-77	2.60572	-2.66735	0.676038	-3.94556	7.96e-05	0.00101858
isogroup4413	Peroxiredoxin-6	1e-148	1412.81	0.866718	0.154942	5.59381	2.22e-08	7.64e-07
isogroup4415	Putative tRNA (cytidine(32)/guanosine(34)-2-O)-methyltransferase	1e-106	8.00315	1.85643	0.337015	5.50844	3.62e-08	1.19e-06
isogroup44167	Rho-related GTP-binding protein Rho6 (Fragment)	5e-38	2.23772	-2.21028	0.644848	-3.4276	0.000608944	0.00570937
isogroup4422	Inhibitor of DNA binding 4	9e-75	4.69796	1.53248	0.466851	3.28258	0.00102861	0.00873805
isogroup4428	Pyridine nucleotide-disulfide oxidoreductase domain-containing protein 2	5e-163	13.1258	-1.91133	0.525255	-3.63886	0.000273846	0.00290663
isogroup4429	Putative nuclease HARBI1 (Fragment)	7e-20	4.13809	-3.44114	0.579173	-5.94147	2.82e-09	1.17e-07
isogroup443	Beta-microseminoprotein (Fragment)	1e-28	294.589	-1.7819	0.315274	-5.65192	1.59e-08	5.71e-07
isogroup4438	NADPH--cytochrome P450 reductase	2e-148	34.3858	-4.2048	0.444105	-9.46803	2.85e-21	6.24e-19
isogroup44385	Sarcosine dehydrogenase (Fragment)	4e-20	4.61769	1.78272	0.459672	3.87824	0.000105214	0.00129975
isogroup44718	Transforming growth factor beta 3 (Fragment)	1e-48	18.3157	0.77505	0.238203	3.25374	0.00113895	0.00948633
isogroup448	Sulfotransferase	9e-85	590.721	1.33802	0.134727	9.93135	3.04e-23	8.3e-21
isogroup45213	GTPase IMAP family member 4	5e-06	6.7492	1.59068	0.377076	4.21844	2.46e-05	0.000371449
isogroup453	Stonustoxin subunit alpha	2e-96	27.5605	-2.41933	0.688438	-3.51423	0.000441039	0.00436425
isogroup45312	Histone H2AX	1e-46	5.40874	4.12292	0.682258	6.04305	1.51e-09	6.59e-08
isogroup454	Leucine-rich repeat-containing protein 17	3e-109	23.4162	-1.74502	0.386992	-4.50919	6.51e-06	0.000118661
isogroup45490	Merlin	5e-39	28.5897	6.20455	0.651475	9.52384	1.67e-21	3.73e-19
isogroup45553	Dehydrogenase/reductase SDR family member 11	1e-42	17.5588	4.21863	0.399429	10.5616	4.49e-26	1.61e-23
isogroup4557	Cytochrome b-c1 complex subunit 1 mitochondrial	2e-95	22.8483	-0.945587	0.272746	-3.46692	0.000526467	0.00507415
isogroup457	Membrane-spanning 4-domains subfamily A member 4A	1e-82	69.7505	-1.11129	0.327222	-3.39614	0.000683437	0.00625872
isogroup4581	Histone acetyltransferase type B catalytic subunit	1e-168	2.67678	1.53692	0.471272	3.26122	0.00110936	0.00929714
isogroup45827	Complement component c3	2e-36	1.69102	-2.01228	0.565918	-3.55577	0.00037687	0.00382597
isogroup4586	Protein disulfide-isomerase	6e-133	229.185	-1.35366	0.273742	-4.945	7.61e-07	1.81e-05
isogroup46	Putative glycerophosphocholine phosphodiesterase GPCPD1 homolog 1	1e-75	98.3575	-1.61357	0.309882	-5.20704	1.92e-07	5.39e-06
isogroup4601	Mediator of RNA polymerase II transcription subunit 15	2e-40	113.756	-1.51066	0.447318	-3.37715	0.000732415	0.00664805
isogroup4608	Chromosome 9 SCAF14991 whole genome shotgun sequence (Fragment)	2e-160	3.74847	-3.9325	0.650894	-6.04169	1.53e-09	6.62e-08
isogroup46198	Apolipoprotein C-I	3e-08	5227.25	-0.775897	0.224081	-3.46257	0.000535041	0.00514071
isogroup4634	Osmotic stress transcription factor 1	1e-40	10.8744	-1.48494	0.3958	-3.75174	0.000175613	0.0020018
isogroup46395	Zinc-binding protein A33	4e-49	2.75137	2.4059	0.642548	3.74431	0.000180893	0.00205136
isogroup464	Family with sequence similarity 3 member C	1e-17	22.2522	-2.76665	0.285131	-9.7031	2.92e-22	6.94e-20
isogroup4654	Transcription factor GATA-4	2e-103	4.73477	-1.82738	0.522921	-3.49456	0.000474836	0.00465239
isogroup4656	Mortality factor 4 protein 1	2e-112	12.4168	1.05427	0.292734	3.60147	0.000316427	0.00328619
isogroup466	Phosphatidic acid phosphatase type 2A	1e-150	7.55677	-2.75286	0.529151	-5.2024	1.97e-07	5.5e-06
isogroup4666	Amino acid transporter	3e-53	1.02588	-2.43425	0.747186	-3.25789	0.00112246	0.00937935
isogroup4679	M-phase phosphoprotein 8	1e-24	46.8986	0.984133	0.201599	4.88165	1.05e-06	2.41e-05
isogroup4685	Apolipoprotein B-100	3e-166	44.0139	-1.07148	0.28595	-3.74711	0.000178885	0.00203232
isogroup46889	GTP-binding protein A	3e-52	1.9534	2.49002	0.67159	3.70764	0.000209199	0.00231947
isogroup469	SYQ (Fragment)	1e-172	6.57868	-1.01188	0.310719	-3.25658	0.00112763	0.00940983
isogroup4692	Flightless I homolog	7e-141	6.98389	-1.40828	0.297505	-4.73362	2.21e-06	4.67e-05
isogroup4708	CLASR	4e-09	17.2786	0.918067	0.278678	3.29436	0.000986463	0.00846787
isogroup472	Torsin-3A	3e-122	11.7337	-3.55551	0.709345	-5.01238	5.38e-07	1.34e-05
isogroup47200	TMLH (Fragment)	6e-49	1.35036	2.01714	0.621445	3.24588	0.0011709	0.00970521
isogroup47227	GAS6	4e-31	5.33752	-4.55874	0.617244	-7.38563	1.52e-13	1.35e-11
isogroup473	UDP-glucuronosyltransferase 2B4	3e-127	197.862	2.98224	0.300947	9.90951	3.78e-23	1.01e-20
isogroup4733	Pleckstrin domain-containing family F member 1	5e-39	6.93415	3.24267	0.469316	6.90936	4.87e-12	3.4e-10
isogroup4737	Krueppel factor 4	6e-41	21.3172	-5.9181	0.521169	-11.3554	6.97e-30	3.84e-27
isogroup4742	Retinol dehydrogenase 13	5e-52	3.73052	2.25631	0.532104	4.24036	2.23e-05	0.000341317
isogroup4749	Teneurin-3	2e-52	23.7182	-5.04519	0.389305	-12.9595	2.08e-38	1.73e-35
isogroup47529	Zinc transporter ZIP9	5e-06	13.0036	-2.59069	0.305763	-8.47284	2.39e-17	3.36e-15
isogroup4759	Ras-related protein Rap-1b	7e-112	4.24057	-2.26718	0.466774	-4.85713	1.19e-06	2.7e-05
isogroup47630	GTPase IMAP family member 4	9e-43	31.6279	1.2829	0.385746	3.32575	0.000881805	0.0077265
isogroup4764	Protocadherin Fat 1	6e-45	16.5317	-1.06559	0.268349	-3.9709	7.16e-05	0.000929578
isogroup4771	LGP2	1e-54	10.5608	2.35624	0.560531	4.20359	2.63e-05	0.000392725
isogroup47754	Merlin	3e-17	16.7366	2.10218	0.558447	3.76433	0.000166995	0.00192562
isogroup47871	Cytochrome P450 2J2	9e-27	5.57999	-3.26187	0.494561	-6.59548	4.24e-11	2.49e-09
isogroup48	Receptor expression-enhancing protein (Fragment)	6e-119	29.7285	-0.790234	0.224452	-3.52073	0.000430368	0.00427237
isogroup48155	Intelectin-1a	4e-31	382.262	7.37504	0.297755	24.7688	1.94e-135	6e-131
isogroup4821	Complement factor H (Fragment)	5e-17	21.5662	1.94668	0.499979	3.89352	9.88e-05	0.00123085
isogroup48228	Serine/arginine-rich splicing factor 3 (Fragment)	1e-07	4.47033	3.28042	0.523066	6.27151	3.58e-10	1.77e-08
isogroup483	7-alpha-hydroxycholest-4-en-3-one 12-alpha-hydroxylase	6e-167	203.188	-6.76488	0.295264	-22.9112	3.59e-116	3.69e-112
isogroup4842	NAD kinase	3e-126	11.0081	-2.62599	0.601573	-4.3652	1.27e-05	0.00021054
isogroup48589	Calcium-binding and coiled-coil domain-containing protein 1	7e-23	14.6582	0.927765	0.267722	3.46541	0.000529433	0.00509823
isogroup4882	Chromosome 9 SCAF15033 whole genome shotgun sequence	2e-27	10.7846	-6.74365	0.577407	-11.6792	1.63e-31	9.65e-29
isogroup48919	Cytosolic sulfotransferase 1	2e-09	6.22351	-3.63441	0.511239	-7.10902	1.17e-12	9.1e-11
isogroup48929	Niemann-Pick C1 protein 1	1e-25	3.31093	4.45646	0.605046	7.3655	1.76e-13	1.56e-11
isogroup4896	Ribonuclease P protein subunit p40	7e-139	4.48903	-1.24618	0.381105	-3.26993	0.00107575	0.00906774
isogroup49	Proline synthetase co-transcribed homolog (Bacterial)	1e-164	24.9278	-0.882862	0.20764	-4.25189	2.12e-05	0.000327286
isogroup4904	Kelch ECH-associated protein 1a (Fragment)	3e-62	10.4045	-1.53909	0.325349	-4.73059	2.24e-06	4.73e-05
isogroup4908	C-factor	4e-142	5.57357	-1.50426	0.4589	-3.27796	0.00104559	0.00884979
isogroup492	Histamine N-methyltransferase	8e-36	29.4899	-4.548	0.515771	-8.81786	1.17e-18	1.91e-16
isogroup49360	Abhydrolase domain containing 12B	2e-34	2.58601	3.58303	0.668637	5.35871	8.38e-08	2.54e-06
isogroup4947	Pancreatic progenitor cell differentiation and proliferation factor	1e-54	421.641	-1.65418	0.442713	-3.73647	0.000186623	0.00210705
isogroup4969	ADP-ribosylation factor protein 4C	3e-15	30.1753	1.40146	0.301595	4.64684	3.37e-06	6.77e-05
isogroup497	Bcl-2-related ovarian killer protein	7e-88	1.6546	-2.85962	0.694855	-4.11543	3.86e-05	0.000546847
isogroup4988	Retinoic acid receptor responder 3	5e-39	1.57792	-2.53156	0.6273	-4.03565	5.45e-05	0.000736703
isogroup49978	Glycerophosphodiester phosphodiesterase domain-containing protein 1	9e-31	1.4861	2.87823	0.759506	3.78961	0.000150887	0.00176563
isogroup5	Fatty acyl-CoA hydrolase precursor medium chain	6e-164	1007.38	-0.419787	0.127127	-3.30211	0.000959596	0.008288
isogroup500	Guanine nucleotide-binding protein 3	2e-154	19.3305	-1.34241	0.274267	-4.89452	9.85e-07	2.28e-05
isogroup50039	GTPase IMAP family member 4	4e-35	2.0415	3.07136	0.620261	4.95172	7.36e-07	1.75e-05
isogroup50080	Protein quaking-A	4e-14	5.18879	1.29835	0.363304	3.57373	0.000351937	0.00360879
isogroup5014	Ubiquitin carboxyl-terminal hydrolase protein	1e-31	9.92976	-1.71369	0.469685	-3.64861	0.000263666	0.0028131
isogroup50190	Heterogeneous nuclear ribonucleoprotein K	1e-14	2.49729	-2.61529	0.685098	-3.81739	0.000134869	0.00160179
isogroup502	Caspase	4e-178	10.6461	-0.909651	0.272114	-3.34291	0.000829049	0.00736047
isogroup50259	Protein kinase C and casein kinase substrate in neurons 3	1e-11	7.77876	1.26003	0.349319	3.60711	0.000309632	0.0032328
isogroup5033	Hepcidin (Fragment)	2e-48	4229.92	-2.07734	0.464375	-4.47342	7.7e-06	0.000137676
isogroup50478	Antizyme inhibitor 1b	8e-28	2.43043	2.70733	0.706141	3.83397	0.00012609	0.00151514
isogroup5054	Gamma-glutamylcyclotransferase (Fragment)	2e-39	5.80275	1.47869	0.333492	4.43394	9.25e-06	0.000160186
isogroup506	Protein lifeguard 4	5e-129	25.4002	-1.22457	0.183671	-6.66718	2.61e-11	1.59e-09
isogroup5069	Cytochrome P450 family 26 subfamily C polypeptide 1	1e-40	718.492	-5.72917	0.586072	-9.77553	1.43e-22	3.54e-20
isogroup5073	S23A2	4e-26	3.60862	-4.42761	0.759104	-5.83268	5.45e-09	2.13e-07
isogroup5088	Teneurin-3	5e-55	6.48224	-2.52453	0.392369	-6.43407	1.24e-10	6.65e-09
isogroup5104	Tetratricopeptide repeat protein 31	3e-33	25.0323	0.950603	0.235161	4.04235	5.29e-05	0.000719446
isogroup511	Arylsulfatase G	4e-93	34.262	1.14139	0.186959	6.10504	1.03e-09	4.64e-08
isogroup51243	CD302 antigen	7e-25	3.67287	-2.75135	0.67162	-4.09659	4.19e-05	0.000584984
isogroup51259	Murinoglobulin-2	1e-10	28.4683	-1.63416	0.36078	-4.52953	5.91e-06	0.000109608
isogroup5135	DCN1 protein 1	7e-173	3.40341	2.05665	0.498221	4.128	3.66e-05	0.000521891
isogroup514	Agmatinase mitochondrial	2e-162	57.7707	-1.05779	0.213113	-4.96352	6.92e-07	1.67e-05
isogroup5144	[Pyruvate dehydrogenase [lipoamide]] kinase isozyme 2 mitochondrial	4e-92	4.43706	-3.37308	0.746476	-4.51867	6.22e-06	0.000114214
isogroup5161	EPM2A (Fragment)	5e-42	13.6378	-2.23301	0.328827	-6.79084	1.11e-11	7.16e-10
isogroup517	Organic solute transporter subunit alpha	4e-158	569.238	-2.30157	0.245772	-9.36464	7.63e-21	1.55e-18
isogroup51716	DDT4L	4e-08	3.67977	-3.50997	0.769847	-4.55931	5.13e-06	9.71e-05
isogroup51807	UDP-glucuronosyltransferase	4e-26	5.17049	4.06044	0.629472	6.45055	1.11e-10	6.01e-09
isogroup5182	LIN1	7e-75	1.25297	-3.50753	0.75517	-4.64469	3.41e-06	6.82e-05
isogroup51846	Myeloid-associated differentiation marker	5e-24	2.69145	2.71379	0.614605	4.4155	1.01e-05	0.00017282
isogroup51862	RNA-directed DNA polymerase from mobile element jockey	3e-10	2.75619	-3.56322	0.798324	-4.46338	8.07e-06	0.000143213
isogroup5189	Integral membrane protein 2B	2e-24	21.1028	3.80256	0.38419	9.89762	4.26e-23	1.12e-20
isogroup5195	KCC2D	4e-95	54.7768	-1.57647	0.233587	-6.74896	1.49e-11	9.37e-10
isogroup52	Chromosome 1 open reading frame 51	4e-113	25.1426	-4.066	0.81157	-5.01004	5.44e-07	1.36e-05
isogroup52047	Chromosome 20 SCAF14744 whole genome shotgun sequence	1e-14	4.20657	4.47066	0.656268	6.81225	9.61e-12	6.28e-10
isogroup52194	Adherens junctions associated protein 1	2e-47	1.22764	-2.45811	0.721213	-3.40829	0.000653705	0.00604569
isogroup52429	Sulfotransferase	1e-10	1.74013	-1.88745	0.546653	-3.45273	0.000554943	0.00531071
isogroup5254	Transmembrane protease serine 2	3e-93	12.2647	-2.84165	0.366718	-7.74889	9.27e-15	9.53e-13
isogroup52668	PiggyBac transposable element-derived protein 3	6e-15	2.48559	-2.60157	0.602138	-4.32056	1.56e-05	0.000249552
isogroup52738	NRDE-2 necessary for RNA interference domain containing (Fragment)	6e-17	8.102	1.37226	0.407802	3.36501	0.00076542	0.00689884
isogroup5304	Alpha-1-antitrypsin	7e-54	40946.8	-0.926949	0.183763	-5.04427	4.55e-07	1.16e-05
isogroup532	Biotinidase	5e-148	115.194	-2.56356	0.245329	-10.4495	1.47e-25	5.05e-23
isogroup53236	Complement C3	3e-39	11.2437	-2.4822	0.525481	-4.72368	2.32e-06	4.86e-05
isogroup5328	Antileukoproteinase	2e-53	14.3087	-1.96881	0.42129	-4.67328	2.96e-06	6.07e-05
isogroup534	CD48 antigen	5e-33	35.3213	-2.3441	0.290905	-8.05797	7.76e-16	9.24e-14
isogroup5373	Chromosome 7 SCAF13760 whole genome shotgun sequence	1e-40	312.525	0.983093	0.213443	4.60588	4.11e-06	8.02e-05
isogroup538	Triple QxxK/R motif-containing protein (Fragment)	4e-45	16.0201	2.33949	0.420859	5.55886	2.72e-08	9.17e-07
isogroup5386	Beta-crystallin S	5e-112	1.72819	-2.81753	0.821114	-3.43136	0.00060057	0.00565607
isogroup5393	Transposable element Tcb1 transposase	1e-16	69.9747	-7.32492	0.495037	-14.7967	1.54e-49	2.26e-46
isogroup540	Interferon-related developmental regulator 1	5e-175	54.5168	-1.42566	0.259622	-5.49129	3.99e-08	1.3e-06
isogroup5447	Presequence protease mitochondrial	2e-24	1.91446	-3.43217	0.663869	-5.16994	2.34e-07	6.37e-06
isogroup546	Small VCP/p97-interacting protein	1e-08	67.1496	-0.796341	0.190777	-4.1742	2.99e-05	0.000440534
isogroup54810	Nuclear receptor subfamily 1 group H member 5 (Fragment)	2e-33	1.24074	-3.55217	0.761021	-4.66764	3.05e-06	6.21e-05
isogroup54811	Nuclear receptor subfamily 1 group H member 5 (Fragment)	1e-33	3.05393	4.01802	0.702721	5.7178	1.08e-08	4.01e-07
isogroup54864	PPUP2988 (Fragment)	3e-19	1.51499	3.59662	0.724065	4.96727	6.79e-07	1.64e-05
isogroup54897	Insulin-induced gene protein	6e-44	8.46579	-2.30153	0.517732	-4.44541	8.77e-06	0.00015325
isogroup5502	FCF1 small subunit (SSU) processome component homolog	4e-125	26.8874	-1.08028	0.330555	-3.26808	0.00108278	0.00911716
isogroup551	COX assembly mitochondrial protein 2 homolog	8e-31	24.5761	1.09665	0.187261	5.85628	4.73e-09	1.87e-07
isogroup5511	Chromosome 15 SCAF14556 whole genome shotgun sequence	8e-49	5.37026	-1.4121	0.411476	-3.43178	0.000599636	0.00565196
isogroup5514	Putative ATP-dependent RNA helicase DDX27	3e-75	5.95849	-2.67626	0.536498	-4.98838	6.09e-07	1.49e-05
isogroup5523	LYR motif-containing protein 5 (Fragment)	6e-46	164.894	-0.518932	0.127449	-4.0717	4.67e-05	0.000643879
isogroup5539	Complement C3	1e-119	30.051	1.05618	0.293194	3.60233	0.000315384	0.00327978
isogroup5541	Si:ch211-193k19.2	2e-80	4.76377	-5.5227	0.63906	-8.6419	5.53e-18	8.23e-16
isogroup5559	Microfibrillar-associated protein 4 type I	3e-116	1521.19	-2.05937	0.373545	-5.51304	3.53e-08	1.16e-06
isogroup556	Eukaryotic translation initiation factor 1A X-chromosomal	4e-60	31.441	-1.17166	0.254197	-4.60925	4.04e-06	7.9e-05
isogroup562	RDH2 (Fragment)	1e-89	101.368	1.55651	0.215037	7.23836	4.54e-13	3.76e-11
isogroup56316	Inositol monophosphatase 1	6e-24	2.90267	-2.75564	0.546881	-5.03883	4.68e-07	1.19e-05
isogroup5632	Myelocytomatosis oncogene homolog	6e-36	39.1958	-1.72581	0.459992	-3.75183	0.00017555	0.0020018
isogroup564	Indoleamine 23-dioxygenase 2	4e-147	182.651	0.923445	0.201169	4.59039	4.42e-06	8.56e-05
isogroup565	Protein lifeguard 1	3e-107	66.0436	-1.12152	0.251565	-4.45816	8.27e-06	0.000145653
isogroup56588	SAM9L (Fragment)	6e-28	1.23705	-2.58	0.788207	-3.27325	0.00106317	0.0089764
isogroup56598	TCP11	2e-09	2.18042	-2.41152	0.527836	-4.56869	4.91e-06	9.36e-05
isogroup566	Pdgfa associated protein 1a	9e-55	11.4571	-2.28764	0.461644	-4.95543	7.22e-07	1.72e-05
isogroup567	Cytochrome P450 2W1	1e-124	90.9284	-3.30514	0.331337	-9.97519	1.96e-23	5.54e-21
isogroup568	OCIA domain-containing protein 2	1e-42	127.356	-0.551548	0.136097	-4.05261	5.06e-05	0.000693489
isogroup56848	Serine proteinase inhibitor (Fragment)	4e-41	90.1962	-5.24445	0.444674	-11.7939	4.2e-32	2.7e-29
isogroup5689	Solute carrier family 43 member 1b	5e-23	4.97836	-2.09044	0.588095	-3.55459	0.000378567	0.00383696
isogroup569	Transmembrane 9 superfamily member	3e-99	61.6993	-4.19203	0.277666	-15.0974	1.68e-51	2.73e-48
isogroup5690	Ch1073-321c8.1 (Fragment)	8e-33	12.5323	1.3289	0.304522	4.36388	1.28e-05	0.000211482
isogroup5716	Chromosome 8 SCAF14545 whole genome shotgun sequence (Fragment)	1e-124	2.05025	1.9856	0.602878	3.29353	0.000989375	0.00848578
isogroup5717	Apoptosis-associated speck protein containing a CARD3	5e-33	10.1483	-1.61075	0.312818	-5.14915	2.62e-07	7.07e-06
isogroup572	4-trimethylaminobutyraldehyde dehydrogenase	5e-179	142.106	-2.84196	0.217128	-13.0888	3.81e-39	3.36e-36
isogroup5736	Sulfotransferase	2e-106	5.90293	1.53465	0.44981	3.41177	0.000645436	0.00598357
isogroup5749	STAG2 (Fragment)	1e-80	35.761	-1.05103	0.234492	-4.48216	7.39e-06	0.000132987
isogroup5753	Activin beta A (Fragment)	1e-25	25.5035	-1.11149	0.326059	-3.40886	0.000652338	0.00603668
isogroup5761	Complement factor H-related protein 2	3e-87	19.1863	1.76365	0.457269	3.85692	0.000114823	0.00139663
isogroup57764	Dpy-30 homolog	6e-30	5.05316	1.16434	0.357133	3.26025	0.00111315	0.00931506
isogroup57998	C1QL2 (Fragment)	2e-22	2.06179	3.64231	0.698031	5.21797	1.81e-07	5.11e-06
isogroup5807	GTP cyclohydrolase 1	6e-113	12.9946	-3.7257	0.573455	-6.49695	8.2e-11	4.53e-09
isogroup5814	Thiamine pyrophosphokinase	1e-09	2.67328	2.16458	0.543167	3.98511	6.74e-05	0.000884988
isogroup582	ADP-ribosylation factor 14 effector protein	3e-126	5.31616	-1.99463	0.466839	-4.27263	1.93e-05	0.00030251
isogroup5825	General transcription factor IIH polypeptide 4	1e-146	11.2001	1.8041	0.3008	5.99769	2e-09	8.52e-08
isogroup58381	Sulfotransferase	2e-14	2.79345	-3.00812	0.650891	-4.62154	3.81e-06	7.5e-05
isogroup584	Glucose-6-phosphate 1-dehydrogenase (Fragment)	3e-179	32.1013	1.49479	0.257173	5.81238	6.16e-09	2.37e-07
isogroup5849	Small nuclear ribonucleoprotein Sm D2	2e-56	11.0093	-0.882726	0.272659	-3.23747	0.00120595	0.00994873
isogroup58738	Eukaryotic translation initiation factor 2 subunit 3	3e-51	0.996235	-2.61222	0.757395	-3.44895	0.000562762	0.00536888
isogroup5874	Transposable element Tc1 transposase	2e-09	0.858666	-2.76012	0.771651	-3.57691	0.000347682	0.00357092
isogroup590	Peptidylprolyl isomerase	1e-134	47.4785	-2.37055	0.570302	-4.15666	3.23e-05	0.000468873
isogroup59003	ATP-dependent RNA helicase DDX55	6e-25	1.44163	2.6073	0.722947	3.60649	0.000310364	0.00323741
isogroup5910	Calcium-binding mitochondrial carrier protein SCaMC-1	1e-36	1.80604	-2.14282	0.613046	-3.49536	0.00047343	0.00464453
isogroup5911	Zgc:165617 protein	1e-47	20.1146	1.30962	0.228112	5.74111	9.41e-09	3.52e-07
isogroup5973	AT8A1	2e-87	1.40818	-2.73702	0.676739	-4.04442	5.25e-05	0.00071342
isogroup5994	Complement component C3 (Fragment)	5e-98	85.6478	2.7367	0.300994	9.09222	9.7e-20	1.84e-17
isogroup601	Tensin-2	8e-138	25.7749	-1.52303	0.277677	-5.48488	4.14e-08	1.34e-06
isogroup6011	GTPase IMAP family member 4	2e-15	11.1733	4.40792	0.441565	9.98249	1.82e-23	5.19e-21
isogroup60156	Eukaryotic translation initiation factor 2 subunit 1	1e-52	5.17779	-1.32941	0.356712	-3.72684	0.000193896	0.00217647
isogroup6016	Inositol monophosphatase 1	4e-162	5.71081	1.19905	0.369814	3.2423	0.00118568	0.00980402
isogroup6026	Myb X protein (Fragment)	1e-20	6.01409	1.31476	0.354888	3.70473	0.000211619	0.00234377
isogroup603	Vesicle-associated membrane protein 5	2e-12	56.1338	0.899279	0.2215	4.05996	4.91e-05	0.000674719
isogroup6052	ATP-dependent RNA helicase DDX24	1e-52	15.4146	-1.03507	0.30583	-3.38447	0.00071316	0.00650002
isogroup60606	Furry homolog (Fragment)	1e-13	1.44386	-3.09532	0.651687	-4.7497	2.04e-06	4.36e-05
isogroup6067	Cholesterol 24-hydroxylase	3e-12	35.7948	-2.35378	0.298162	-7.89429	2.92e-15	3.27e-13
isogroup6080	Methyltransferase 7B protein	3e-35	8.87123	0.971403	0.284393	3.41571	0.00063616	0.0059118
isogroup6090	FGGY carbohydrate kinase domain-containing protein	9e-54	27.1684	-1.18633	0.248391	-4.77607	1.79e-06	3.89e-05
isogroup6112	ATIF1 (Fragment)	2e-42	85.1655	-0.543032	0.156192	-3.47668	0.000507657	0.00492701
isogroup6123	YEATS domain-containing protein 4	1e-42	4.52844	-1.64292	0.425196	-3.86391	0.000111588	0.00136319
isogroup6125	DYN2 (Fragment)	6e-16	20.1528	-1.08533	0.281761	-3.85195	0.000117181	0.00142138
isogroup6129	Alcohol dehydrogenase Class vi (Fragment)	1e-99	63.9487	-1.06009	0.216167	-4.90404	9.39e-07	2.19e-05
isogroup6156	Myb/SANT DNA-binding domain-containing 4 protein	4e-20	1.0996	-3.32282	0.698305	-4.75841	1.95e-06	4.2e-05
isogroup6158	Plastin-3	2e-101	3.35022	1.82228	0.48379	3.76667	0.000165437	0.00191151
isogroup616	Probable protein COQ10 mitochondrial	1e-122	32.571	-0.908366	0.279236	-3.25304	0.00114175	0.00949942
isogroup6161	NVL (Fragment)	4e-115	31.7161	-1.14072	0.269961	-4.22549	2.38e-05	0.000361258
isogroup617	Uridine-cytidine kinase 1	9e-39	14.6432	-1.8336	0.285443	-6.4237	1.33e-10	7.08e-09
isogroup6186	Type II antifreeze protein (Fragment)	2e-61	210.411	3.24981	0.49742	6.53333	6.43e-11	3.63e-09
isogroup6196	SPD2B (Fragment)	2e-27	2.67709	-2.34844	0.605008	-3.88167	0.000103741	0.00128361
isogroup62	Sulfotransferase	6e-160	151.451	-1.53608	0.161665	-9.50163	2.07e-21	4.58e-19
isogroup621	Phytanoyl-CoA dioxygenase peroxisomal	3e-170	506.073	1.14339	0.226361	5.05117	4.39e-07	1.13e-05
isogroup62223	Trypsinogen H2_3a4	7e-09	4463.29	6.97931	0.417019	16.7362	7.14e-63	1.57e-59
isogroup625	Zinc finger Ran-binding domain-containing protein 2	2e-74	43.4422	0.82072	0.162161	5.06114	4.17e-07	1.07e-05
isogroup6261	Transmembrane protein 229B	1e-69	4.10959	-2.01964	0.398463	-5.06858	4.01e-07	1.04e-05
isogroup628	Elongation of very long chain fatty acids protein	3e-155	74.1739	-1.76859	0.302679	-5.84311	5.12e-09	2e-07
isogroup6284	Apolipoprotein B-100	2e-136	2.78263	1.67259	0.516721	3.23694	0.00120819	0.00995815
isogroup63	Reverse transcriptase	9e-95	31.2564	-5.94944	0.385864	-15.4185	1.23e-53	2.23e-50
isogroup63782	Vasoactive intestinal peptide receptor 1b (Fragment)	5e-53	9.89064	1.22277	0.371935	3.2876	0.00101045	0.00861856
isogroup6385	Zinc finger protein 235	5e-47	2.426	2.05108	0.617968	3.31908	0.000903155	0.00788669
isogroup6426	Trans-aconitate 3-methyltransferase	3e-111	84.3649	3.39125	0.553018	6.13226	8.66e-10	3.96e-08
isogroup6440	SH3 domain and tetratricopeptide repeat-containing protein 2	2e-21	9.48102	1.00025	0.304098	3.28922	0.00100465	0.00858575
isogroup6457	Chromosome 8 SCAF7842 whole genome shotgun sequence (Fragment)	5e-146	34.9844	-3.03797	0.559845	-5.42644	5.75e-08	1.82e-06
isogroup6466	Reverse transcriptase	2e-25	3.18115	4.08646	0.616298	6.63066	3.34e-11	2e-09
isogroup6499	Reticulon	9e-08	55.9329	-4.20694	0.541359	-7.77108	7.78e-15	8.13e-13
isogroup6521	Mitochondrial import inner membrane translocase subunit TIM14	7e-51	53.3865	-0.78084	0.184342	-4.23582	2.28e-05	0.000347429
isogroup6561	Inactive serine protease PAMR1	1e-68	2.87767	-2.24536	0.56002	-4.00943	6.09e-05	0.000807817
isogroup6566	Golgi SNAP receptor complex member 1	4e-51	16.238	0.974643	0.237299	4.10723	4e-05	0.000564303
isogroup6581	Tetratricopeptide repeat domain 36 (Fragment)	1e-115	117.08	1.03635	0.17691	5.8581	4.68e-09	1.85e-07
isogroup659	Solute carrier family 22 member 5	7e-148	23.1308	-6.3481	0.562661	-11.2823	1.61e-29	8.25e-27
isogroup6592	Complement component C3 (Fragment)	2e-92	498.202	-0.92853	0.251208	-3.69626	0.0002188	0.00240688
isogroup661	Coatomer subunit zeta-1	6e-109	30.8961	0.96125	0.28687	3.35083	0.00080571	0.00718844
isogroup6678	Cytochrome c oxidase subunit 4 isoform 1 mitochondrial	4e-111	65.9767	-0.984918	0.191268	-5.14941	2.61e-07	7.06e-06
isogroup6682	Sister of P-glycoprotein	1e-11	0.775279	-2.63994	0.802114	-3.29123	0.000997498	0.00854594
isogroup6683	Protein FAM20A	3e-28	89.6987	-1.14263	0.213015	-5.3641	8.14e-08	2.48e-06
isogroup6693	Epithelial-stromal interaction protein 1	3e-20	14.7104	2.02846	0.437316	4.63842	3.51e-06	7e-05
isogroup67	Clathrin light chain	2e-99	50.1614	-0.692497	0.131578	-5.263	1.42e-07	4.1e-06
isogroup67132	TATA element modulatory factor	1e-33	2.57128	2.12173	0.560315	3.78668	0.000152673	0.00178383
isogroup67257	Ankyrin repeat domain-containing protein 49	8e-13	1.87608	-4.25386	0.658452	-6.4604	1.04e-10	5.66e-09
isogroup675	Tributyltin-binding protein type	2e-89	464.549	-1.28806	0.374857	-3.43614	0.00059006	0.00557411
isogroup6776	Glycerol-3-phosphate dehydrogenase [NAD(+)]	1e-66	5.50278	3.06839	0.488335	6.28338	3.31e-10	1.66e-08
isogroup6778	Cytochrome P450 CYP2N	5e-41	7.75	1.66892	0.43694	3.81956	0.00013369	0.00158974
isogroup67814	Hepatocyte nuclear factor 4-alpha	7e-55	1.04579	-2.93869	0.766543	-3.83369	0.000126233	0.00151568
isogroup6786	Reverse transcriptase protein (Fragment)	1e-91	3.38982	-2.65252	0.508634	-5.21498	1.84e-07	5.19e-06
isogroup6794	Betaine homocysteine methyltransferase	2e-143	15407.7	-0.961403	0.183286	-5.24538	1.56e-07	4.47e-06
isogroup68	Inositol oxygenase	4e-177	1077.81	-1.6033	0.193232	-8.29728	1.07e-16	1.42e-14
isogroup6800	Complement component C3 (Fragment)	3e-105	13750.4	-0.527081	0.118954	-4.43098	9.38e-06	0.000161858
isogroup68093	Type II antifreeze protein (Fragment)	3e-06	19.4329	-3.41494	0.769788	-4.43621	9.16e-06	0.000158925
isogroup68187	Metalloendopeptidase	8e-11	21.7869	-3.13652	0.583704	-5.37348	7.72e-08	2.37e-06
isogroup6824	ATP-binding cassette sub-family G member 4	3e-09	2.47713	2.31099	0.531319	4.34952	1.36e-05	0.000222698
isogroup686	Cathepsin B	7e-177	149.587	1.30104	0.282303	4.60867	4.05e-06	7.92e-05
isogroup6873	SV2B (Fragment)	1e-17	3.57755	-5.11018	0.658253	-7.76325	8.28e-15	8.57e-13
isogroup69	Complement factor B	4e-159	858.991	-0.978482	0.131588	-7.43597	1.04e-13	9.53e-12
isogroup690	Multiple coagulation factor deficiency 2	6e-58	259.463	0.816943	0.199576	4.09339	4.25e-05	0.000591787
isogroup69011	TRY1 (Fragment)	3e-11	575.209	1.30889	0.402629	3.25086	0.00115057	0.0095599
isogroup69161	T-cell surface glycoprotein CD4-2 (Fragment)	7e-09	2.51515	2.74537	0.605802	4.53179	5.85e-06	0.000108571
isogroup692	Sodium-coupled neutral amino acid transporter 5	6e-164	17.6525	1.47192	0.336962	4.36819	1.25e-05	0.000208351
isogroup69264	Nuclear receptor coactivator 2	4e-11	3.67789	1.40358	0.43056	3.2599	0.0011145	0.00932301
isogroup6935	AT8B4	3e-23	4.2138	-5.17453	0.630893	-8.20192	2.37e-16	3e-14
isogroup6944	LYR motif-containing protein 2	6e-42	13.6581	-1.2628	0.283754	-4.45032	8.57e-06	0.000150213
isogroup6946	Cytidine deaminase	2e-103	39.9951	-1.76365	0.395463	-4.45971	8.21e-06	0.000145103
isogroup6965	Lysosomal-associated membrane protein 1	3e-10	50.184	0.702198	0.19516	3.59806	0.000320597	0.00332614
isogroup6980	Transcription initiation factor TFIID subunit 3	1e-60	27.5488	0.704584	0.190942	3.69005	0.000224214	0.00245417
isogroup70081	Protein FAM20A	3e-38	2.30055	3.24139	0.606083	5.34809	8.89e-08	2.68e-06
isogroup701	Apolipoprotein B-100	9e-157	68.05	2.22135	0.25934	8.56539	1.08e-17	1.58e-15
isogroup704	Soluble FGFR2 variant 3 (Fragment)	6e-63	18.0317	1.68519	0.373383	4.5133	6.38e-06	0.000116661
isogroup70465	Flotillin-2	6e-09	4.1387	2.15409	0.491803	4.37998	1.19e-05	0.000199113
isogroup705	HMG box domain containing 4 (Fragment)	6e-157	11.5327	1.2548	0.344338	3.64409	0.000268342	0.00286003
isogroup708	Solute carrier family 38 member 5b	3e-180	200.013	-1.92194	0.177268	-10.842	2.18e-27	8.94e-25
isogroup7085	Centrin2 (Fragment)	1e-91	16.8458	1.48864	0.302936	4.91404	8.92e-07	2.09e-05
isogroup714	Carboxylic ester hydrolase	1e-15	30.013	-1.35184	0.19156	-7.057	1.7e-12	1.28e-10
isogroup7145	Sodium-dependent multivitamin transporter	2e-38	48.7765	-1.21741	0.211362	-5.75984	8.42e-09	3.17e-07
isogroup7157	Annexin (Fragment)	3e-72	307.684	-0.817982	0.207741	-3.93751	8.23e-05	0.00105116
isogroup7201	RING finger protein 11	4e-95	6.05138	-2.55848	0.456082	-5.60968	2.03e-08	7.05e-07
isogroup7208	Aconitate hydratase	2e-50	1.00392	-2.53608	0.73901	-3.43172	0.000599767	0.00565196
isogroup7224	NLRC3 protein	1e-19	4.31482	-2.7251	0.449403	-6.06382	1.33e-09	5.84e-08
isogroup723	Integumentary mucin C.1 putative	1e-17	96.3509	0.844788	0.175322	4.81849	1.45e-06	3.21e-05
isogroup72395	Chromosome 5 SCAF14581 whole genome shotgun sequence	8e-08	14.7091	2.97421	0.305249	9.74353	1.97e-22	4.77e-20
isogroup724	Eukaryotic translation initiation factor 3 subunit Jb (Fragment)	2e-56	88.8284	-0.980368	0.164136	-5.97291	2.33e-09	9.82e-08
isogroup7248	WW domain-binding protein 4	2e-34	5.63542	2.16632	0.468845	4.62055	3.83e-06	7.53e-05
isogroup72597	Nucleosome-remodeling factor subunit BPTF	4e-16	4.79247	1.35443	0.411565	3.29093	0.000998556	0.00854788
isogroup728	Leiomodin-1	2e-92	6.14537	-4.38423	0.708116	-6.1914	5.96e-10	2.82e-08
isogroup7290	Protein ACN9 mitochondrial	8e-60	1.78115	-2.27722	0.626212	-3.6365	0.000276373	0.00292741
isogroup73251	Murinoglobulin-2	2e-19	3.10954	3.03348	0.687251	4.41394	1.02e-05	0.000173979
isogroup73332	Phosphatase orphan 1	2e-17	4.96191	-1.7897	0.505022	-3.5438	0.000394402	0.00397159
isogroup7355	Vitellogenin Aa	9e-163	14.5994	2.03854	0.581939	3.50301	0.000460036	0.00452609
isogroup73573	Si:dkey-174c13.2	1e-09	3.93081	2.44153	0.519204	4.70246	2.57e-06	5.32e-05
isogroup73614	Signal transducer and activator of transcription	4e-17	1.55451	2.89539	0.794585	3.64391	0.000268532	0.00286107
isogroup74072	SCAN domain-containing protein 3	4e-19	1.54619	3.30129	0.757855	4.3561	1.32e-05	0.000217385
isogroup741	XK-related protein	7e-162	10.2219	-3.32085	0.692806	-4.79333	1.64e-06	3.6e-05
isogroup74190	Cytochrome c oxidase subunit 3	3e-31	3890.94	2.35227	0.28993	8.11325	4.93e-16	6.05e-14
isogroup74716	T-complex protein 1 subunit gamma (Fragment)	1e-31	1121.74	1.57145	0.361287	4.3496	1.36e-05	0.000222698
isogroup7516	PPUP3535	3e-65	67.3145	2.44884	0.462339	5.29665	1.18e-07	3.48e-06
isogroup75172	Myosin 1 beta (Fragment)	6e-42	3.28297	1.8116	0.506521	3.57656	0.000348142	0.00357225
isogroup7657	Apolipoprotein M	6e-82	2442.94	-1.11747	0.159657	-6.99917	2.57e-12	1.89e-10
isogroup768	Mono [ADP-ribose] polymerase PARP16	3e-122	15.2037	1.15313	0.269674	4.27601	1.9e-05	0.000298563
isogroup7701	Arrestin domain-containing protein 3	2e-85	3.1555	2.12446	0.61264	3.46772	0.000524898	0.00506089
isogroup775	C1q and tumor necrosis factor related protein	1e-70	171.55	-0.910997	0.142645	-6.38646	1.7e-10	8.86e-09
isogroup7757	Low-density lipoprotein receptor	2e-17	19.1342	-1.75675	0.405406	-4.33332	1.47e-05	0.000237607
isogroup77637	EHD3 (Fragment)	2e-39	8.89583	1.357	0.294156	4.6132	3.97e-06	7.77e-05
isogroup78	Cytochrome P450 4c3	3e-144	329.043	0.890167	0.19924	4.4678	7.9e-06	0.000141095
isogroup780	Guanine nucleotide-binding protein 3 protein	2e-144	6.17173	-1.87876	0.452704	-4.1501	3.32e-05	0.000480191
isogroup7801	NADH-ubiquinone oxidoreductase chain 1	2e-124	804.005	-1.21473	0.26746	-4.54173	5.58e-06	0.000104265
isogroup78098	Beta-microseminoprotein (Fragment)	2e-08	1.08898	-2.9594	0.880913	-3.35947	0.000780919	0.00701394
isogroup7824	Complement component c3	1e-114	28.0895	-2.68256	0.325994	-8.22887	1.89e-16	2.43e-14
isogroup7832	Histone deacetylase	1e-07	6.34574	-1.5521	0.3927	-3.95237	7.74e-05	0.000994132
isogroup7833	Mitochondrial inner membrane protein OXA1L	2e-96	1.88213	3.27615	0.73936	4.43106	9.38e-06	0.000161858
isogroup78593	Protein NLRC3	4e-07	5.37373	1.79139	0.533111	3.36027	0.000778677	0.00699788
isogroup78766	Chromosome 2 SCAF15004 whole genome shotgun sequence	1e-07	2.62761	-2.05813	0.570213	-3.60941	0.000306893	0.0032088
isogroup7878	Receptor-transporting protein 3 (Fragment)	2e-83	10.3458	2.55398	0.611554	4.17621	2.96e-05	0.000437087
isogroup78787	KIAA0391	1e-18	1.94954	3.70999	0.650145	5.70641	1.15e-08	4.26e-07
isogroup7903	Ionized calcium-binding adapter molecule 2	3e-86	10.5296	1.42837	0.414094	3.44939	0.000561845	0.00536319
isogroup793	Cytochrome P450 2F5	6e-117	12.2079	-6.62437	0.624793	-10.6025	2.9e-26	1.05e-23
isogroup7941	Hydroxyacid-oxoacid transhydrogenase mitochondrial (Fragment)	3e-113	57.9735	-1.06515	0.213665	-4.98515	6.19e-07	1.51e-05
isogroup7966	ATP-binding cassette sub-family C (CFTR/MRP) member 4 (Fragment)	6e-22	2.37606	-2.9148	0.71185	-4.09469	4.23e-05	0.000589145
isogroup8	Insulin growth factor I Ea-2	4e-79	740.019	-0.428343	0.118925	-3.60179	0.000316035	0.00328392
isogroup8010	SHLB2	2e-106	2.61038	-3.12085	0.613189	-5.08954	3.59e-07	9.42e-06
isogroup802	Coagulation factor X	5e-119	781.092	-0.920111	0.207359	-4.43729	9.11e-06	0.000158341
isogroup80228	ZK1236.4	9e-12	2.71753	3.62681	0.659933	5.49572	3.89e-08	1.27e-06
isogroup8042	Thyroid hormone receptor interactor 4 (Fragment)	7e-57	43.3961	2.16747	0.363875	5.95664	2.57e-09	1.08e-07
isogroup80475	Jumonji C domain containing histone demethylase 1 homolog D	1e-19	6.23754	-1.61513	0.436827	-3.69742	0.000217804	0.00239849
isogroup8071	Chromosome 8 SCAF14543 whole genome shotgun sequence	2e-36	4.98477	1.28963	0.375654	3.43302	0.000596909	0.00563363
isogroup8081	Peroxin (Fragment)	4e-08	14.5109	-0.961868	0.235471	-4.08488	4.41e-05	0.000610932
isogroup80829	Alpha-amylase (Fragment)	3e-38	4.09694	4.92367	0.605253	8.1349	4.12e-16	5.08e-14
isogroup8083	Cysteine-rich protein 1	4e-35	14.1623	1.2505	0.288925	4.32811	1.5e-05	0.000242408
isogroup809	SID1 transmembrane family member 1	8e-161	16.9838	-0.830821	0.201058	-4.13224	3.59e-05	0.000514006
isogroup8136	PPUP9740 (Fragment)	3e-31	3.34498	-2.18067	0.542941	-4.0164	5.91e-05	0.000789131
isogroup8137	UPF0728 protein	1e-45	4.51603	1.73013	0.489604	3.53373	0.00040974	0.00410192
isogroup817	MIA3 (Fragment)	2e-94	20.8634	-1.32865	0.296583	-4.47988	7.47e-06	0.000134044
isogroup82	N-acetylated-alpha-linked acidic dipeptidase 2	2e-155	23.6535	1.20875	0.299451	4.03655	5.42e-05	0.00073454
isogroup8203	Putative pre-mRNA-splicing factor ATP-dependent RNA helicase DHX16	7e-65	7.15654	1.07215	0.291601	3.67675	0.000236221	0.00256466
isogroup822	Cytochrome P450 2F2	3e-120	2.64941	-3.94442	0.617816	-6.38447	1.72e-10	8.96e-09
isogroup823	Ferredoxin 1	4e-92	39.919	-2.82083	0.267672	-10.5384	5.75e-26	2.04e-23
isogroup8233	Alpha-2-macroglobulin	5e-34	221.047	-3.54926	0.341092	-10.4056	2.34e-25	7.84e-23
isogroup8242	Ubiquitously-expressed transcript	2e-81	6.94451	-2.09584	0.397077	-5.27817	1.3e-07	3.81e-06
isogroup8285	Sodium bicarbonate cotransporter isoform 1 (Fragment)	2e-27	2.38699	-3.23913	0.611088	-5.3006	1.15e-07	3.41e-06
isogroup829	Chromosome 3 SCAF14700 whole genome shotgun sequence (Fragment)	5e-132	6.28394	1.08748	0.297413	3.65645	0.000255733	0.00273889
isogroup8321	Elongin-C	6e-78	21.4342	0.830037	0.219488	3.7817	0.000155758	0.00181369
isogroup8339	GTPase IMAP family member 4	3e-68	7.28263	2.10495	0.61774	3.4075	0.000655606	0.00606145
isogroup8363	Sulfurtransferase	3e-40	35.1748	1.04066	0.195543	5.3219	1.03e-07	3.06e-06
isogroup837	Electron-transfer-flavoprotein beta polypeptide	2e-135	245.309	-0.971318	0.144654	-6.71477	1.88e-11	1.17e-09
isogroup8372	Pterin-4-alpha-carbinolamine dehydratase 2	4e-64	57.9596	0.756638	0.200328	3.777	0.000158729	0.00184267
isogroup8386	Zinc finger CCHC-type and RNA-binding motif-containing protein 1	1e-89	11.3587	0.925229	0.285758	3.23781	0.00120451	0.00994374
isogroup842	Probable nucleolar protein 5-2	1e-179	29.6177	-1.36175	0.380055	-3.58305	0.000339612	0.00349519
isogroup8421	Chromosome 4 SCAF15093 whole genome shotgun sequence	4e-83	4.6897	1.89141	0.408017	4.63562	3.56e-06	7.07e-05
isogroup8433	Double-stranded RNA-dependent protein kinase	2e-41	11.5392	2.01528	0.451303	4.46547	7.99e-06	0.000142146
isogroup8446	GTPase IMAP family member 2	1e-28	5.12752	-1.7662	0.460096	-3.83877	0.000123653	0.0014911
isogroup8463	Gap junction protein	6e-11	1.8482	-2.83154	0.64112	-4.41655	1e-05	0.000172174
isogroup8475	Cytochrome c oxidase subunit 7A-related protein mitochondrial	5e-65	70.4846	-0.648938	0.153464	-4.2286	2.35e-05	0.000356469
isogroup848	Cytochrome P450 2J2	3e-179	20.5209	-4.24181	0.440155	-9.6371	5.57e-22	1.29e-19
isogroup850	Flotillin-1	2e-30	57.3198	0.527418	0.128548	4.10289	4.08e-05	0.000573175
isogroup852	Steryl-sulfatase	2e-137	34.7579	-1.42433	0.245367	-5.80489	6.44e-09	2.46e-07
isogroup856	Reverse transcriptase protein	1e-104	37.7107	-5.10832	0.414128	-12.3351	5.86e-35	4.41e-32
isogroup8563	Alpha-2-macroglobulin	4e-32	1546.34	0.765922	0.214916	3.56383	0.000365489	0.00372792
isogroup863	Chromosome 10 SCAF15019 whole genome shotgun sequence	2e-76	12.9166	0.992743	0.24816	4.00042	6.32e-05	0.000836409
isogroup8654	Prolactin-releasing peptide	8e-57	1.24508	-3.63258	0.706124	-5.14439	2.68e-07	7.23e-06
isogroup8655	Molybdenum cofactor biosynthesis protein 1	2e-15	6.41782	-2.10281	0.369855	-5.68548	1.3e-08	4.77e-07
isogroup866	Protein FAM198A	1e-24	4.40836	1.8534	0.531308	3.48836	0.000485991	0.00474962
isogroup8686	3-oxo-5-beta-steroid 4-dehydrogenase	1e-135	4.28331	1.60067	0.409064	3.91301	9.12e-05	0.00114718
isogroup8687	Heparan-alpha-glucosaminide N-acetyltransferase	8e-47	2.13009	-2.2675	0.635584	-3.56759	0.000360274	0.00368454
isogroup8724	Cyclin D (Fragment)	1e-23	1.86634	3.06909	0.698641	4.39295	1.12e-05	0.000189658
isogroup8759	Nicotinamide phosphoribosyltransferase	5e-71	5.39592	-2.63402	0.468797	-5.61869	1.92e-08	6.74e-07
isogroup8778	FYVE and coiled-coil domain-containing protein 1	1e-100	5.1003	1.45928	0.386936	3.77138	0.000162347	0.00187906
isogroup89	CMP-N-acetylneuraminate-beta-galactosamide-alpha-23-sialyltransferase 4	5e-97	159.931	0.780793	0.170828	4.57064	4.86e-06	9.29e-05
isogroup890	TEN3 (Fragment)	3e-126	6.32278	-2.0635	0.459543	-4.49034	7.11e-06	0.000128372
isogroup8921	DAG1 (Fragment)	2e-74	54.8406	-4.23512	0.519094	-8.15869	3.39e-16	4.21e-14
isogroup8948	Mannose-P-dolichol utilization defect 1 protein	5e-100	0.903153	-2.55293	0.710297	-3.59418	0.000325417	0.00336595
isogroup897	Glycerate kinase (Fragment)	2e-90	83.462	1.16821	0.191503	6.10022	1.06e-09	4.77e-08
isogroup8975	Mothers against decapentaplegic homolog 9	7e-22	4.9193	1.6813	0.410358	4.09716	4.18e-05	0.000583816
isogroup9	Very long-chain acyl-CoA synthetase	3e-140	599.754	1.72113	0.243904	7.05661	1.71e-12	1.28e-10
isogroup900	Phosphatidate phosphatase LPIN1	2e-158	18.2089	-1.52867	0.315515	-4.84499	1.27e-06	2.85e-05
isogroup9002	UDP-glucuronosyltransferase	3e-32	16.9312	-3.94588	0.395048	-9.98837	1.71e-23	4.94e-21
isogroup9029	Pentaxin	5e-101	34.5529	3.26684	0.654981	4.98769	6.11e-07	1.49e-05
isogroup904	Gap junction protein	1e-153	83.0854	-0.878788	0.212337	-4.13865	3.49e-05	0.000502429
isogroup9082	Ankyrin repeat domain-containing protein 2	2e-39	2.41736	3.84394	0.67266	5.71454	1.1e-08	4.08e-07
isogroup909	Constitutive coactivator of PPAR-gamma protein 1	2e-52	14.0832	-0.823965	0.22271	-3.69972	0.000215837	0.00237853
isogroup9104	Bile acid-CoA:amino acid N-acyltransferase	1e-12	20.9574	3.11966	0.349148	8.93508	4.07e-19	7.17e-17
isogroup9111	Cytochrome P450 2D15	5e-10	5.54868	-3.83316	0.610601	-6.27768	3.44e-10	1.71e-08
isogroup914	Integral membrane protein 2B	3e-159	539.381	1.13374	0.119409	9.49464	2.21e-21	4.87e-19
isogroup917	F10A1	3e-120	93.356	1.11052	0.285332	3.89204	9.94e-05	0.00123739
isogroup9196	Pleckstrin domain-containing family G member 2	4e-16	4.9637	-1.67469	0.436182	-3.83943	0.000123321	0.00148766
isogroup92	Probable urocanate hydratase	3e-151	97.4363	-0.856712	0.233713	-3.66566	0.000246699	0.00265783
isogroup9223	DNA-directed RNA polymerases I and III subunit RPAC1	5e-94	4.50983	-1.73982	0.50811	-3.4241	0.000616841	0.00576179
isogroup9249	Chromosome 1 SCAF14640 whole genome shotgun sequence	1e-80	1.04967	-3.35806	0.701273	-4.78851	1.68e-06	3.68e-05
isogroup927	Pyroglutamyl-peptidase 1	2e-132	20.9274	1.72925	0.230716	7.49513	6.62e-14	6.17e-12
isogroup929	Complement factor H	2e-154	2054.09	-0.826256	0.200773	-4.11538	3.87e-05	0.000546847
isogroup93	UDP-glucuronosyltransferase 2A1	4e-128	162.892	-2.81547	0.27764	-10.1408	3.64e-24	1.11e-21
isogroup935	Ferritin	2e-116	2.76684	-2.38163	0.585353	-4.06871	4.73e-05	0.000651326
isogroup9370	PPUP455 (Fragment)	2e-08	29.6089	-2.57136	0.494069	-5.20446	1.95e-07	5.45e-06
isogroup940	Reticulon	3e-124	204.603	0.743359	0.179368	4.14432	3.41e-05	0.000491296
isogroup9456	Nocturnin	1e-18	30.6568	-3.04528	0.698146	-4.36196	1.29e-05	0.000212772
isogroup9469	Keratin type I cytoskeletal 18	2e-77	16.8403	1.34685	0.377767	3.5653	0.000363439	0.00370946
isogroup9488	S-formylglutathione hydrolase	5e-95	49.6524	0.790708	0.149239	5.29827	1.17e-07	3.45e-06
isogroup9492	Peroxiredoxin-1	1e-132	24.1868	1.31836	0.387836	3.39927	0.000675652	0.00620771
isogroup9496	Otopetrin-3 (Fragment)	1e-48	7.78146	-3.29752	0.46306	-7.12115	1.07e-12	8.4e-11
isogroup9499	PLD1 (Fragment)	7e-86	29.6201	-5.50237	0.682252	-8.06501	7.32e-16	8.79e-14
isogroup9517	Synaptonemal complex protein 1	8e-12	4.88627	3.27442	0.516251	6.3427	2.26e-10	1.16e-08
isogroup9522	TSC22 domain family protein 3	2e-76	3.84294	1.91953	0.512163	3.74789	0.000178325	0.00202672
isogroup953	Growth hormone-inducible transmembrane protein	4e-161	69.3088	0.675829	0.141697	4.76953	1.85e-06	4e-05
isogroup9536	LIN1 (Fragment)	2e-33	1.67133	-2.63158	0.67048	-3.92492	8.68e-05	0.00109591
isogroup957	Cell death activator CIDE-B	3e-121	239.258	1.10199	0.131165	8.40151	4.41e-17	6.04e-15
isogroup9595	SWI/SNF-related matrix-associated actin-dependent regulator of chromatin subfamily A protein 1	1e-98	6.23985	1.34032	0.365653	3.66555	0.000246806	0.00265805
isogroup961	Cysteine dioxygenase type I	2e-133	481.309	-1.54397	0.375176	-4.11533	3.87e-05	0.000546847
isogroup9635	UNQ655/PRO1286	5e-26	8.94328	-1.16234	0.29537	-3.93519	8.31e-05	0.0010583
isogroup9652	1-acylglycerol-3-phosphate O-acyltransferase ABHD5	1e-83	7.86335	-1.97704	0.410531	-4.8158	1.47e-06	3.25e-05
isogroup9656	Merlin	3e-41	36.3712	-3.49186	0.421953	-8.27548	1.28e-16	1.67e-14
isogroup9673	Protein NLRC3 (Fragment)	7e-157	22.0183	-1.25736	0.317203	-3.96389	7.37e-05	0.000953305
isogroup9719	Chromosome 2 SCAF8387 whole genome shotgun sequence	1e-13	477.296	0.749445	0.211583	3.54209	0.000396963	0.00399216
isogroup9759	Tripartite motif-containing protein 35	3e-73	14.0808	-4.61793	0.517243	-8.92797	4.34e-19	7.6e-17
isogroup9779	VPS41 (Fragment)	3e-143	5.30984	2.49612	0.458404	5.44525	5.17e-08	1.65e-06
isogroup9790	RAB31 member RAS oncogene family	2e-119	29.6599	2.93613	0.464647	6.31905	2.63e-10	1.33e-08
isogroup9835	TC1 transposase protein	7e-18	13.6891	2.02912	0.429577	4.72354	2.32e-06	4.86e-05
isogroup9836	Mitogen-activated protein kinase kinase 2a	2e-119	3.12143	2.21462	0.61458	3.60347	0.000314002	0.00326871
isogroup984	Coagulation factor X	4e-157	190.413	-1.01615	0.171306	-5.93178	3e-09	1.23e-07
isogroup9848	Galectin	9e-57	4.97692	1.9277	0.48517	3.97324	7.09e-05	0.000922052
isogroup9881	DNA-dependent protein kinase catalytic subunit	5e-63	2.99267	1.82938	0.534617	3.42186	0.000621949	0.00580071
isogroup9888	Interleukin-8 protein	2e-34	22.9285	2.62493	0.378157	6.94136	3.88e-12	2.77e-10
isogroup9892	Eukaryotic translation initiation factor 3 subunit L	4e-119	243.316	-0.789398	0.114937	-6.8681	6.51e-12	4.43e-10
isogroup991	Pol polyprotein (Fragment)	2e-158	3.44464	-4.8659	0.719371	-6.76411	1.34e-11	8.51e-10
isogroup9910	MDR1A	2e-58	24.018	-1.67309	0.461524	-3.62514	0.000288809	0.00304034
isogroup9934	SH3 domain-binding glutamic acid-rich protein	4e-60	2.78781	1.67538	0.506932	3.30495	0.000949926	0.00821369
isogroup9948	ES1 protein mitochondrial	7e-121	16.0635	2.30431	0.551388	4.17912	2.93e-05	0.000431948
isogroup999	Double-stranded RNA-binding protein Staufen homolog 2	1e-09	107.844	-0.810342	0.154004	-5.26182	1.43e-07	4.12e-06
isogroup9998	Histone H4	1e-48	1.33386	-3.13074	0.82974	-3.77316	0.00016119	0.00186707
